# Supplementary material
Source: PubMed Central journal article supplement (PMC4492479)
Supplement: NIHMS702492-supplement-2.pdf [file NIHMS702492-supplement-2.pdf]

Supporting Information for:

**Tunable, Chemoselective Amination *via* Silver Catalysis**

Jared W. Rigoli, Cale D. Weatherly, Juliet M. Alderson, Brian T. Vo and Jennifer M. Schomaker\*

*Department of Chemistry, University of Wisconsin-Madison, 1101 University Avenue*

*Madison, Wisconsin, 53706-1396*

|                                                                  |    |
|------------------------------------------------------------------|----|
| <b>Table of Contents</b> .....                                   | 1  |
| <b>I. NMR Spectra</b> .....                                      | 2  |
| <b>II. Proton NMR of AgOTf:Ligand Titration experiment</b> ..... | 56 |
| <b>III. Pulse Gradient Spin Echo Diffusion Experiments</b> ..... | 60 |

# I. NMR Spectra.

## Compound 3h.

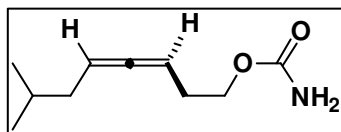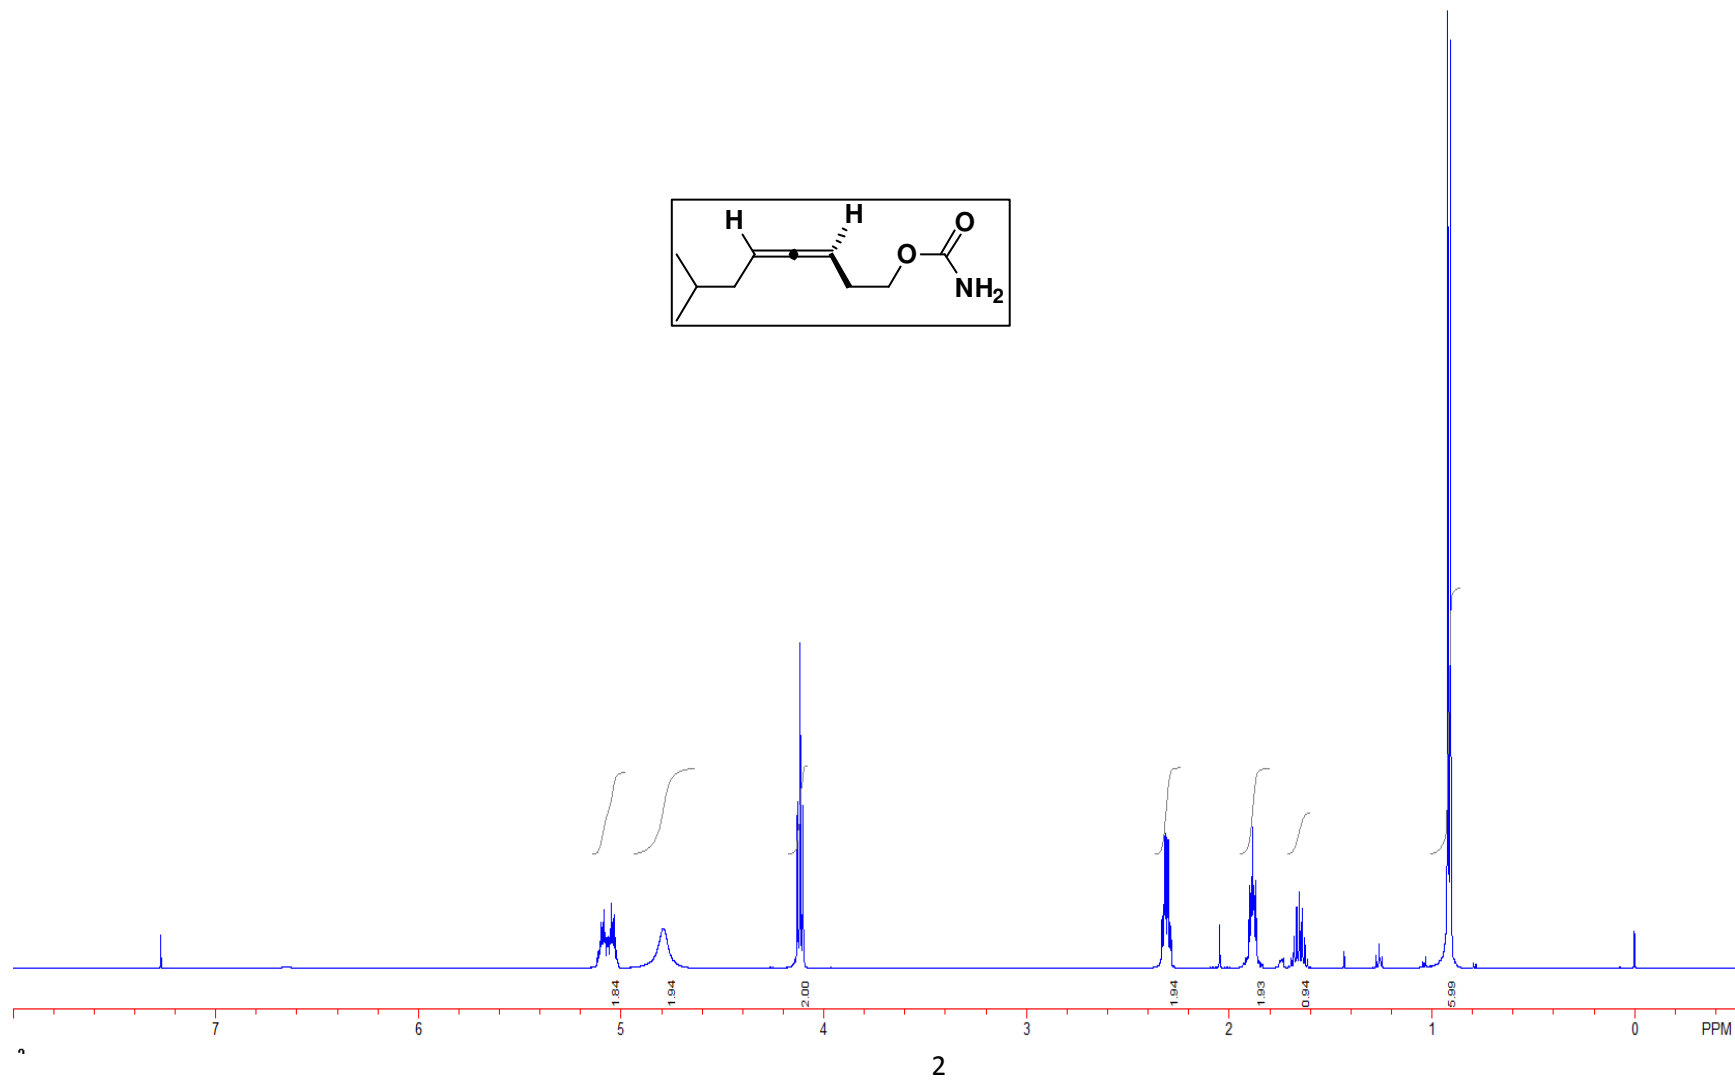

Compound 3h.

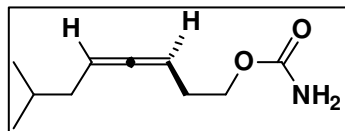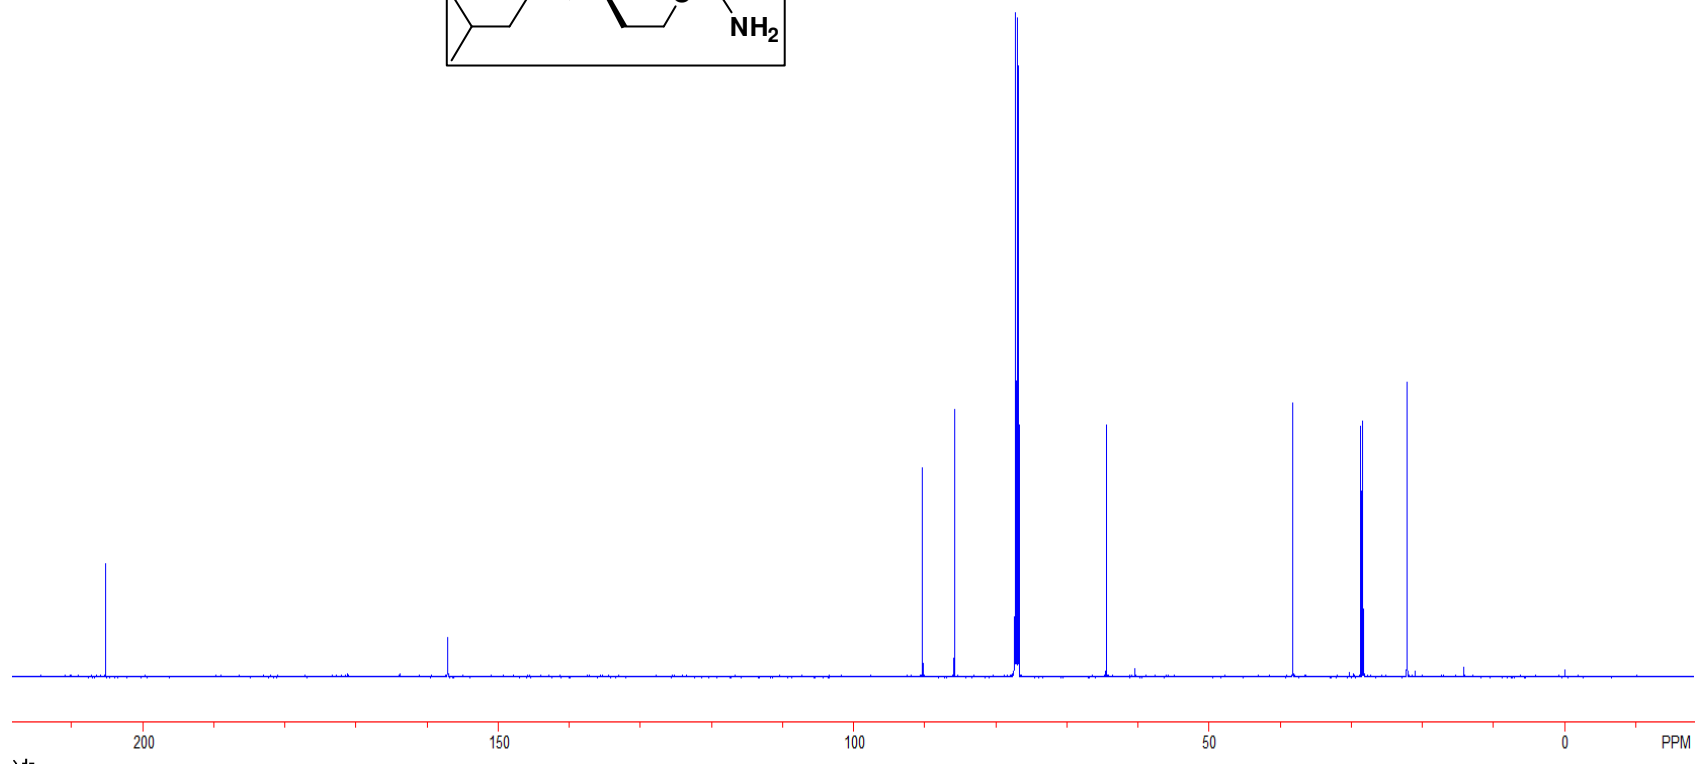

Compound 3j.

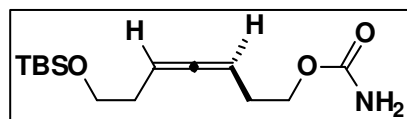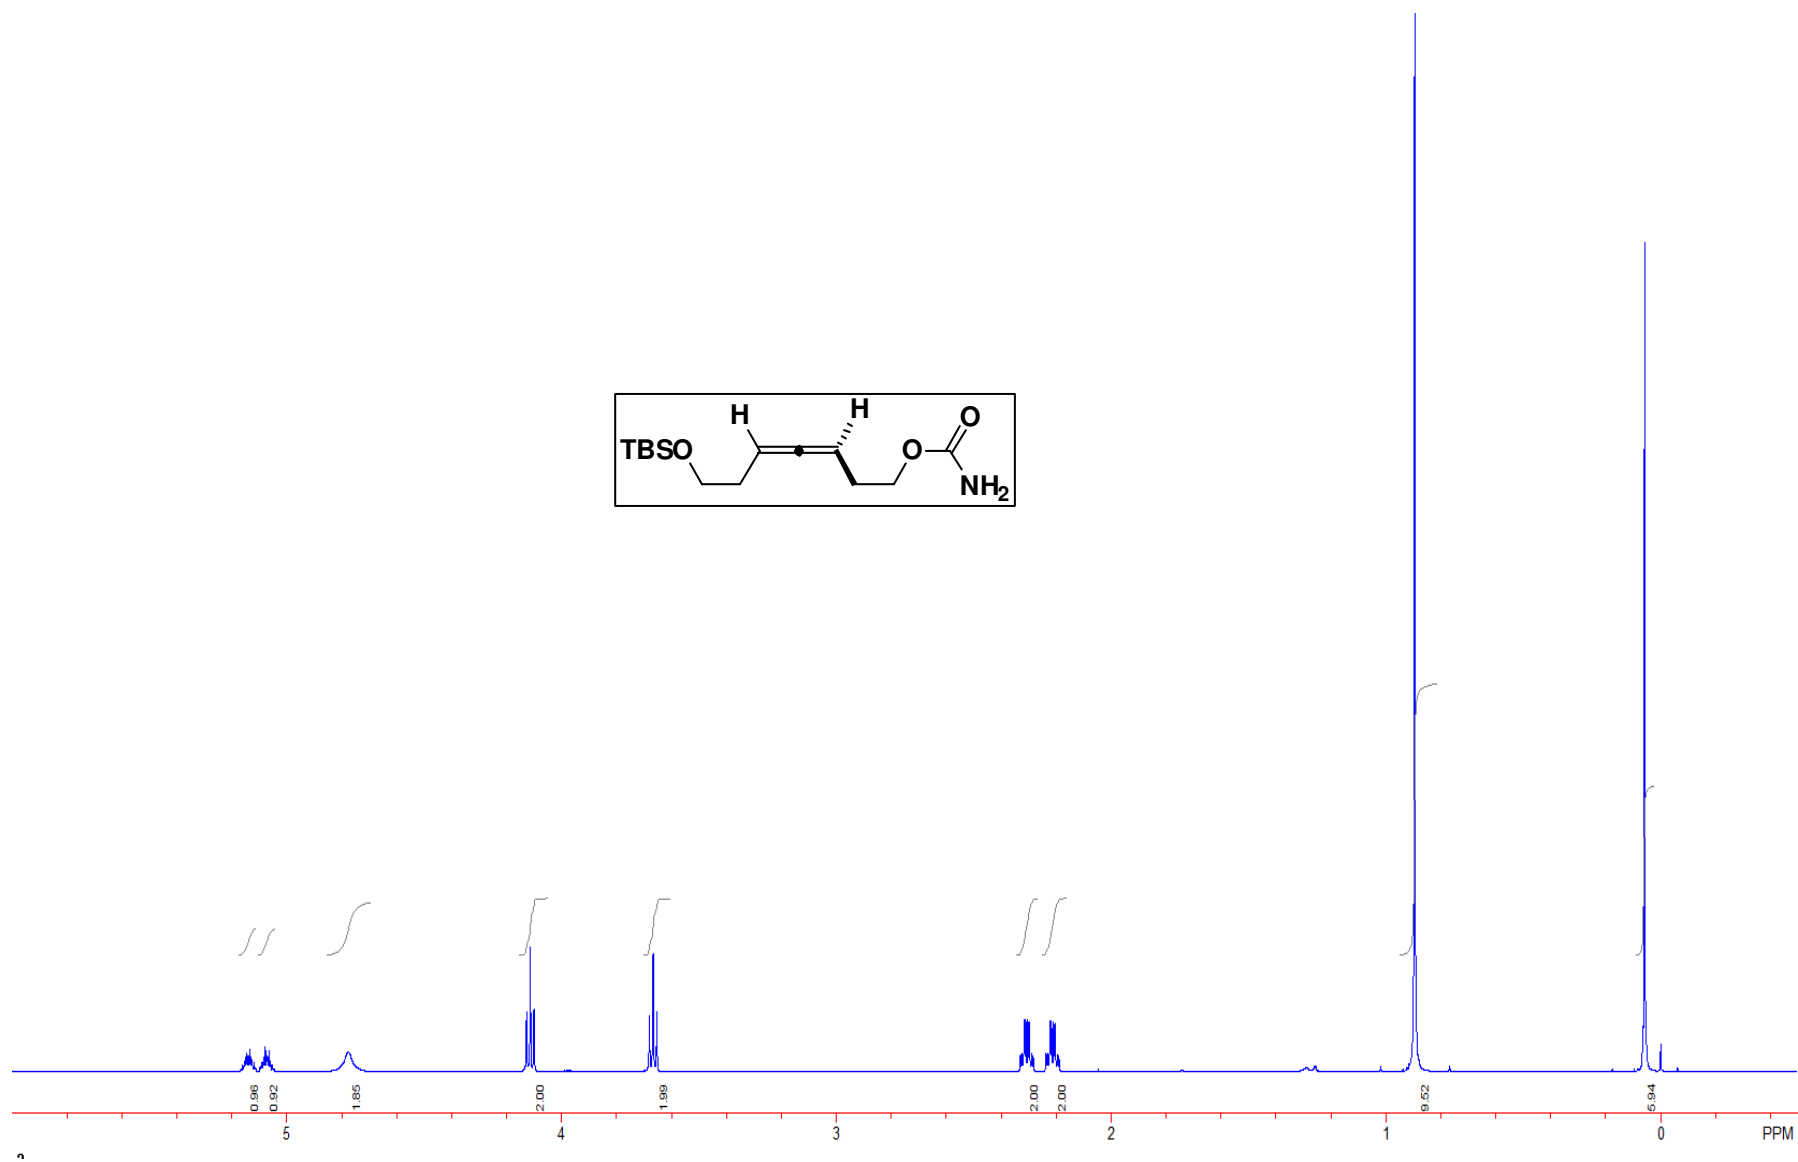

Compound 3j.

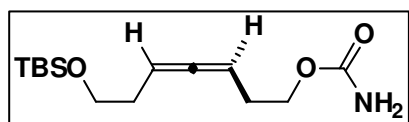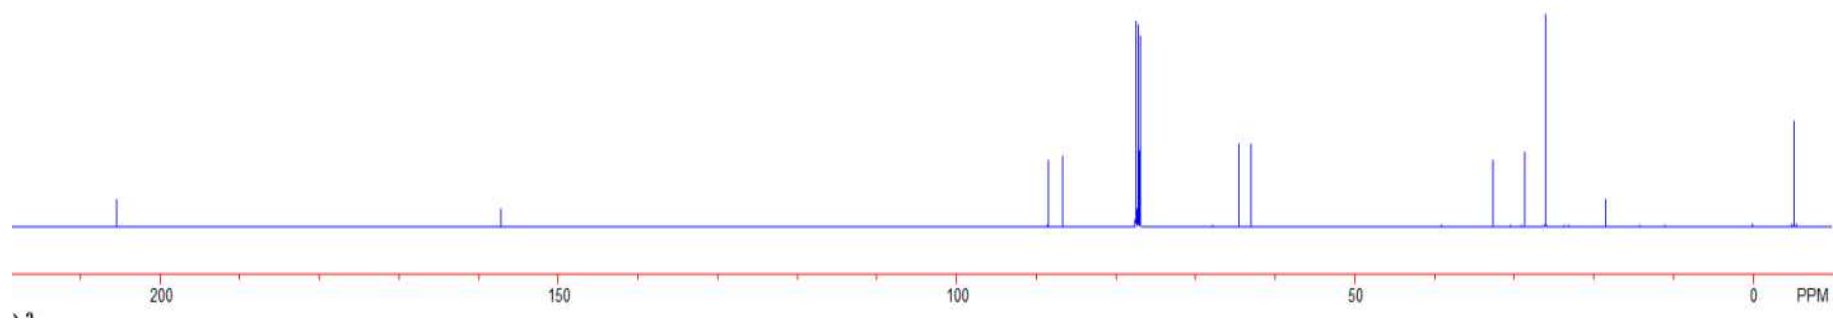

Compound 4h.

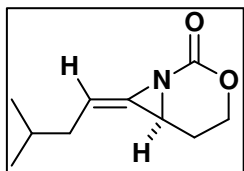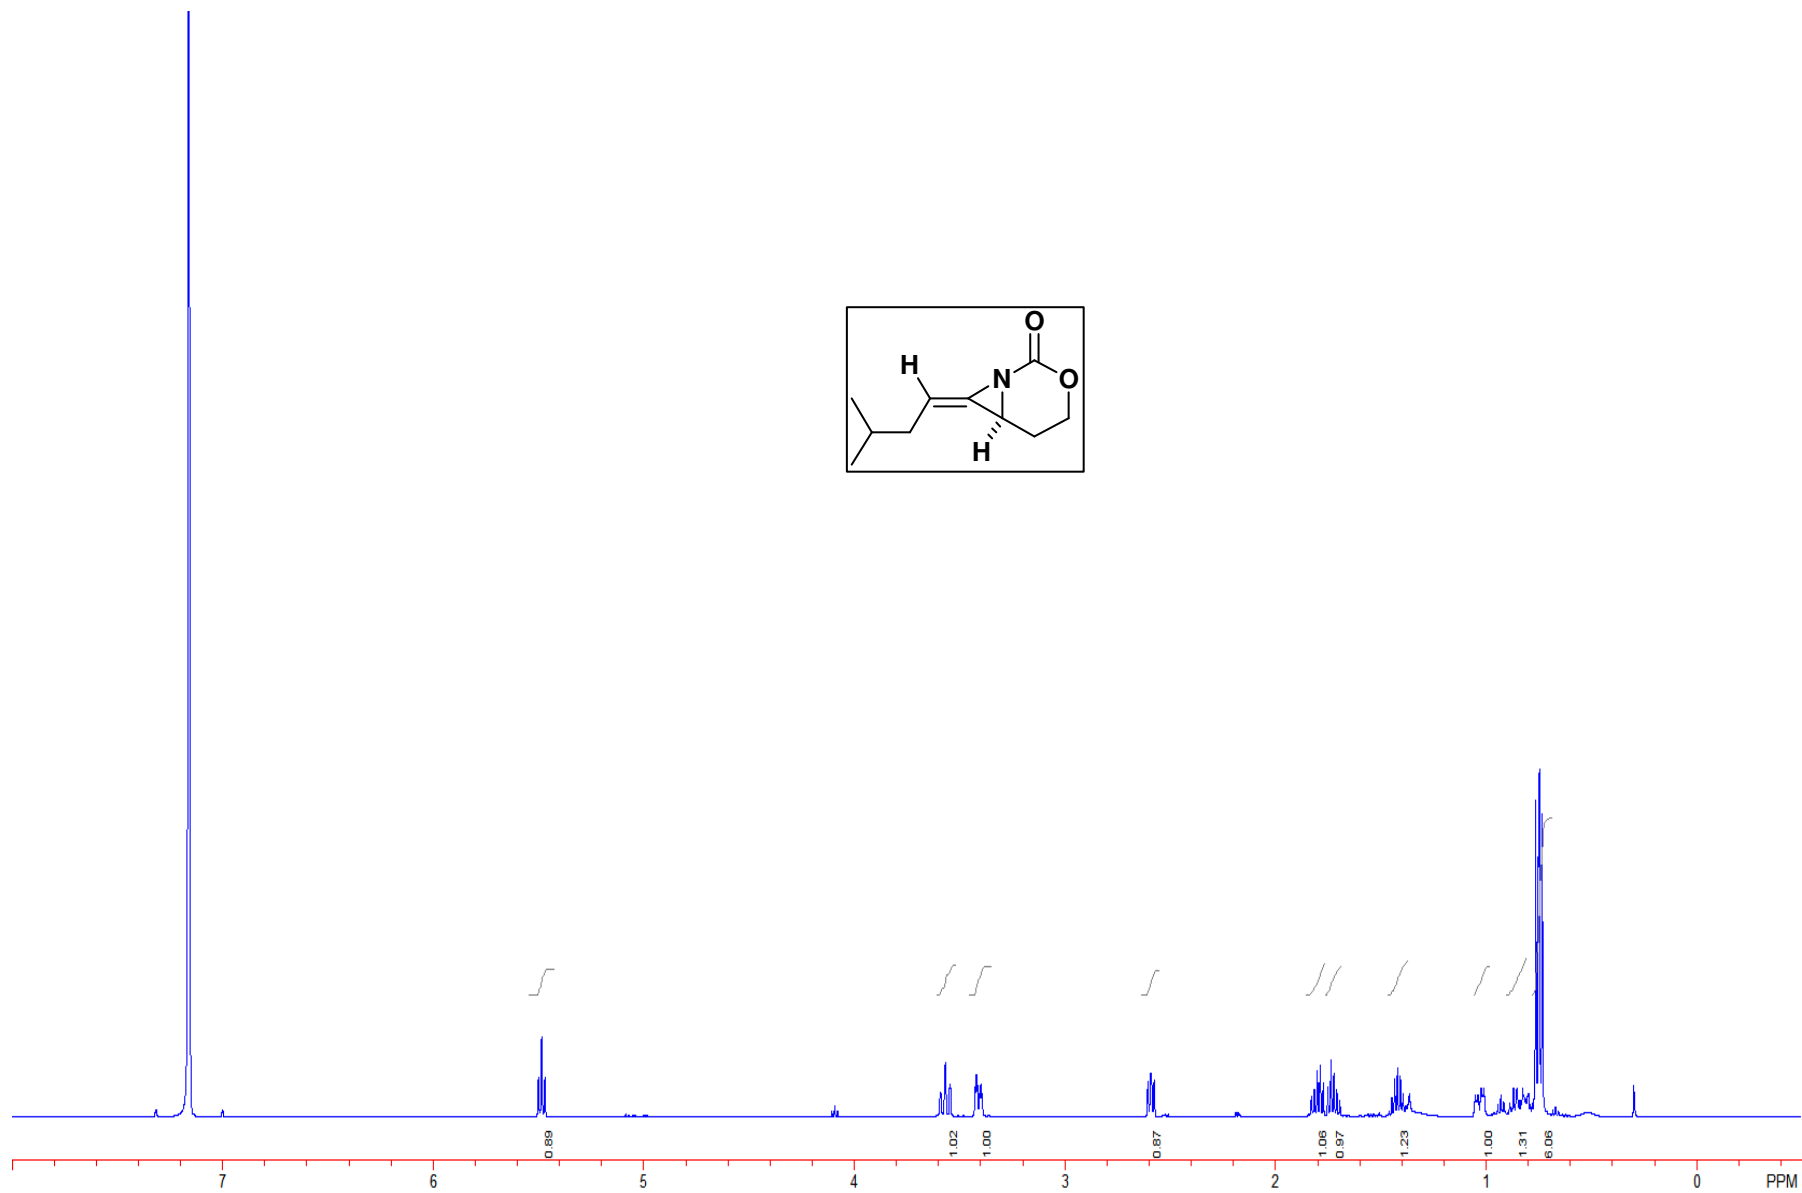

Compound 4h.

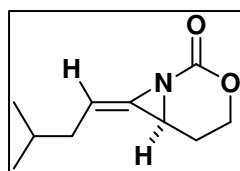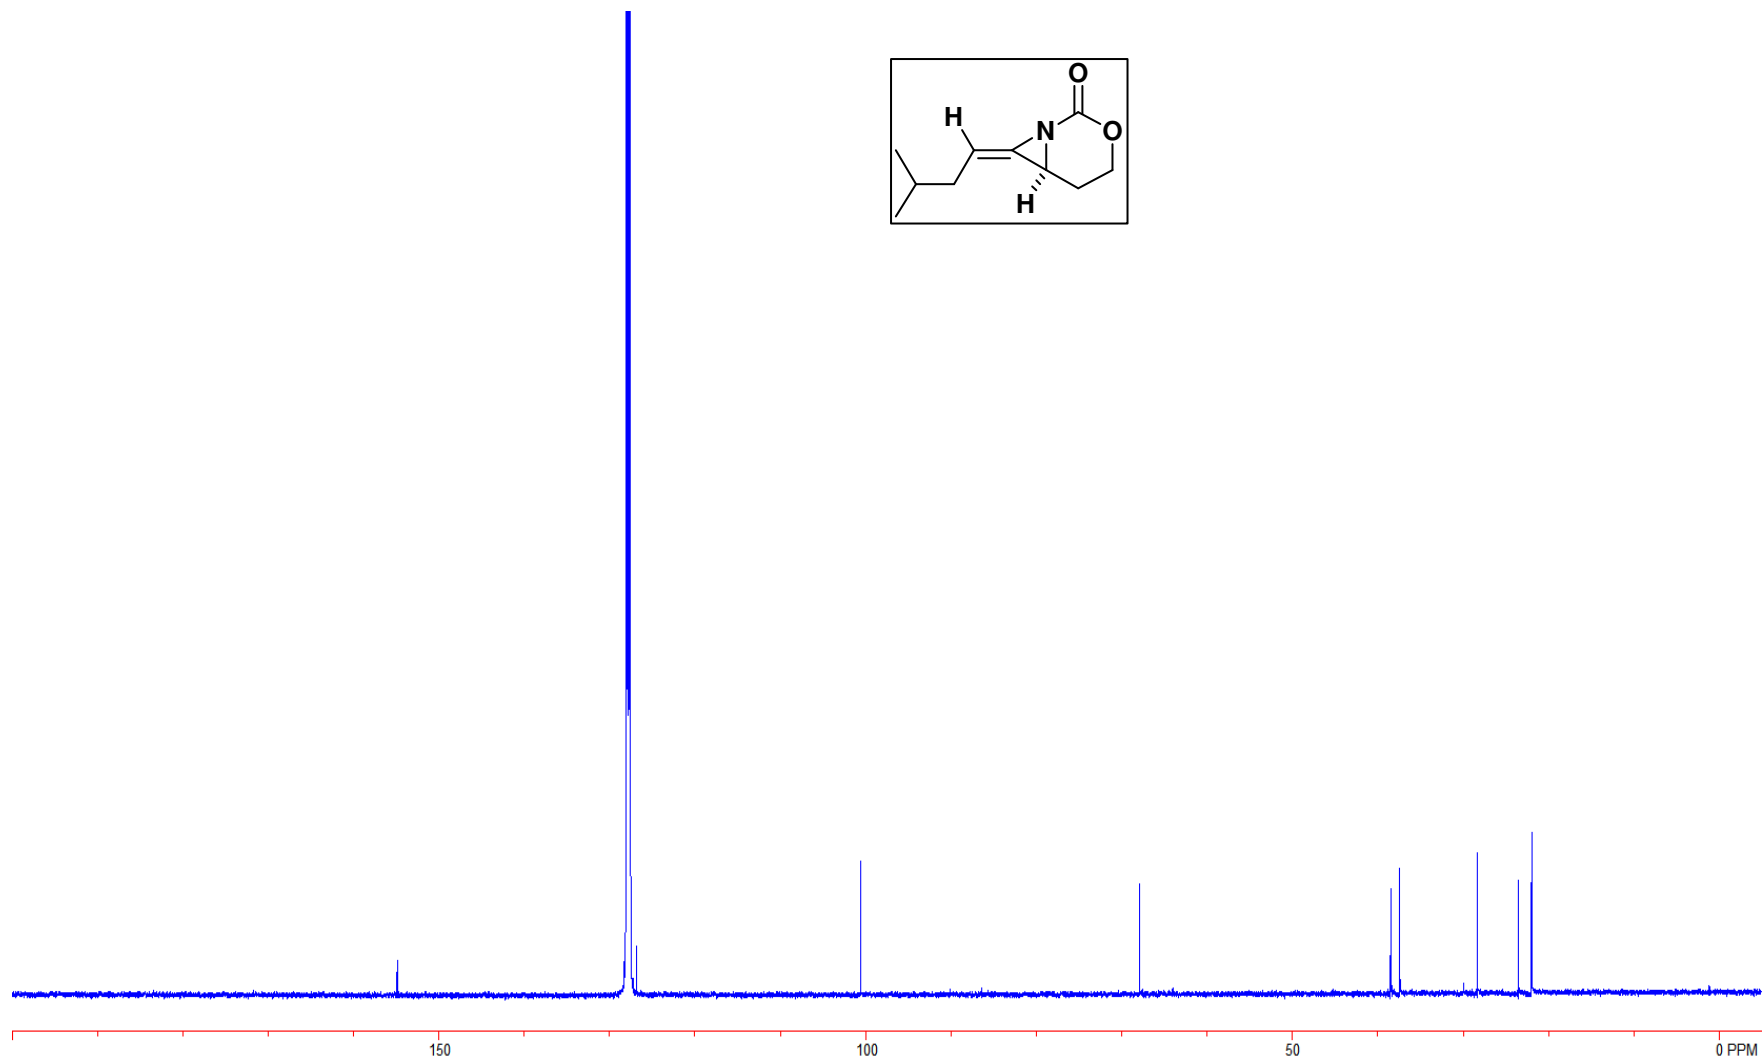

Compound 4j.

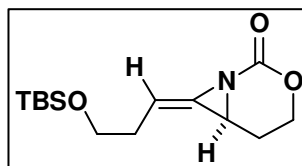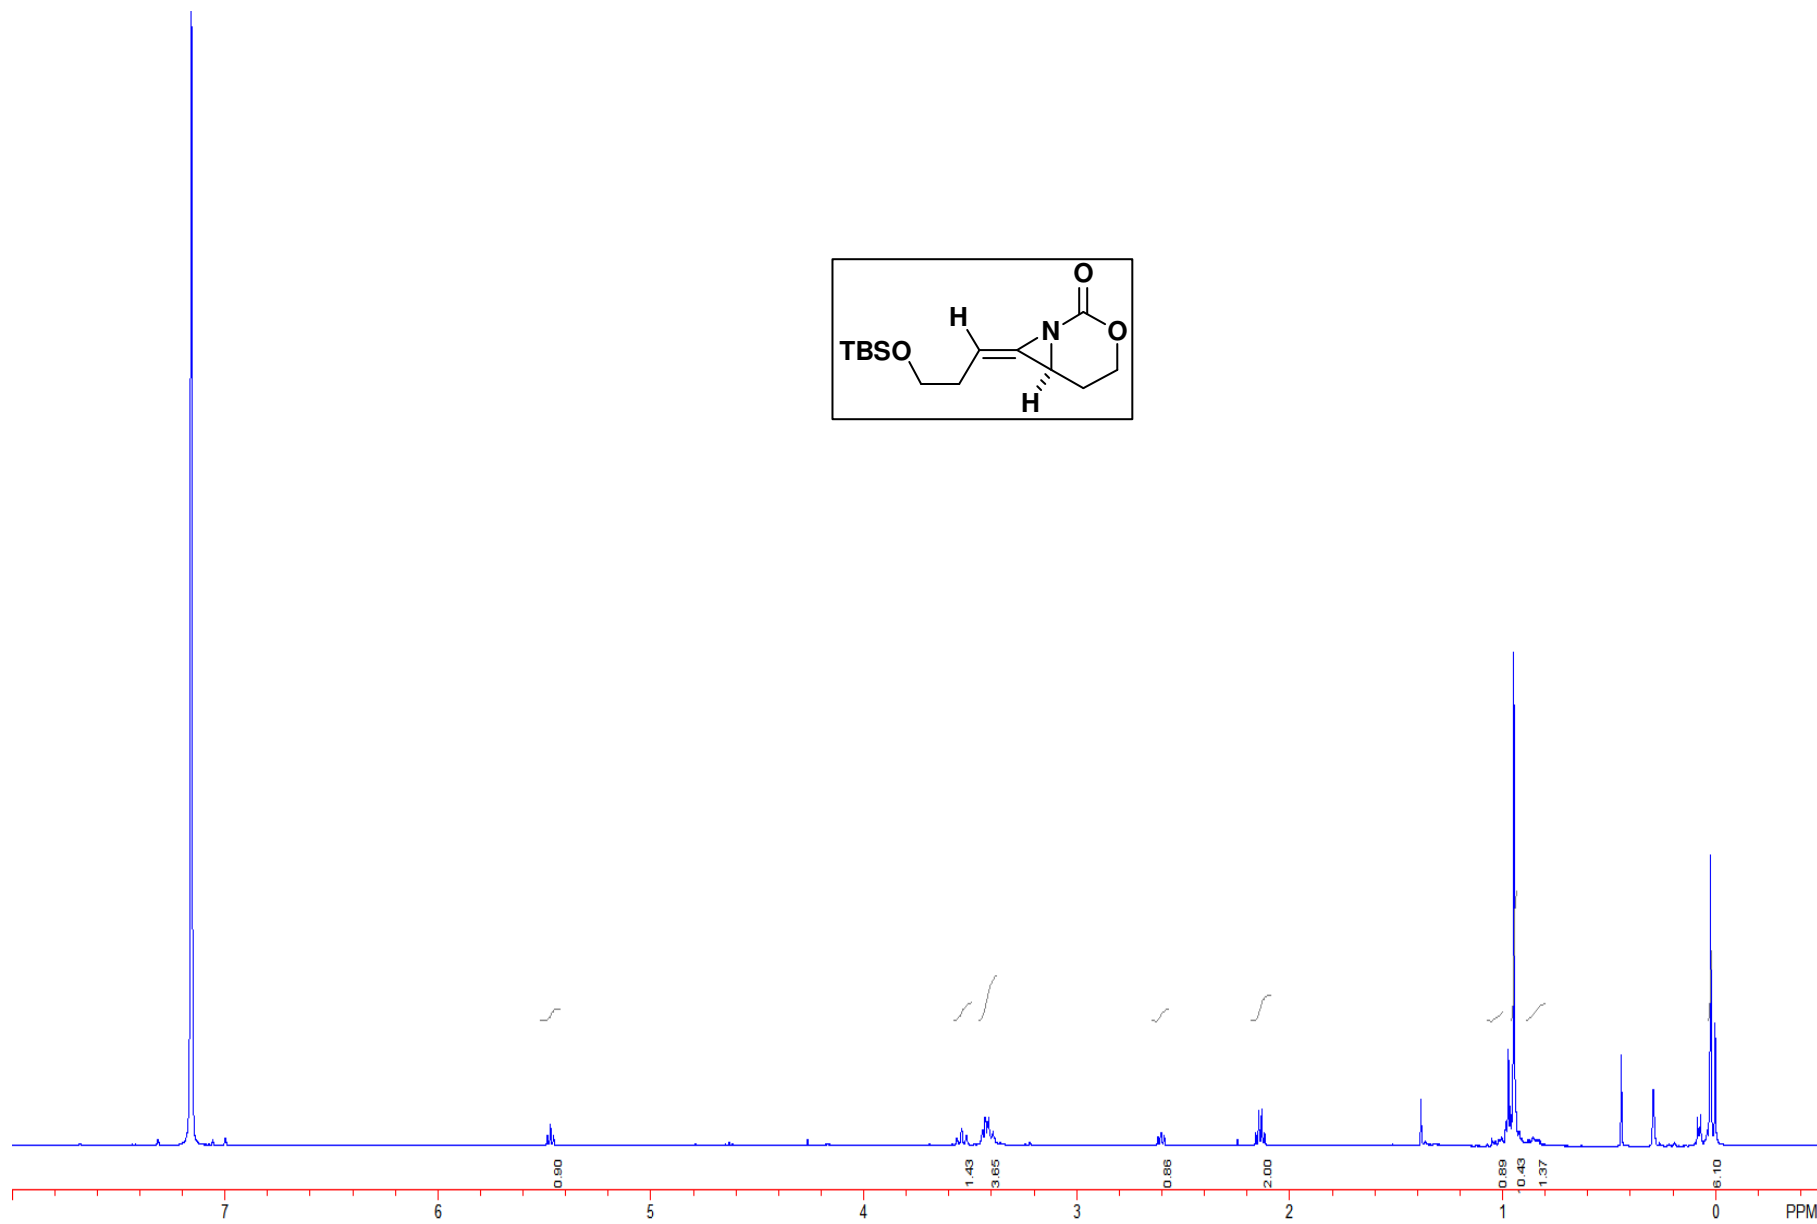



Compound 4j.

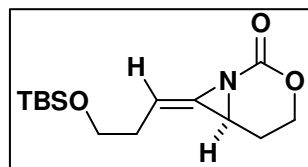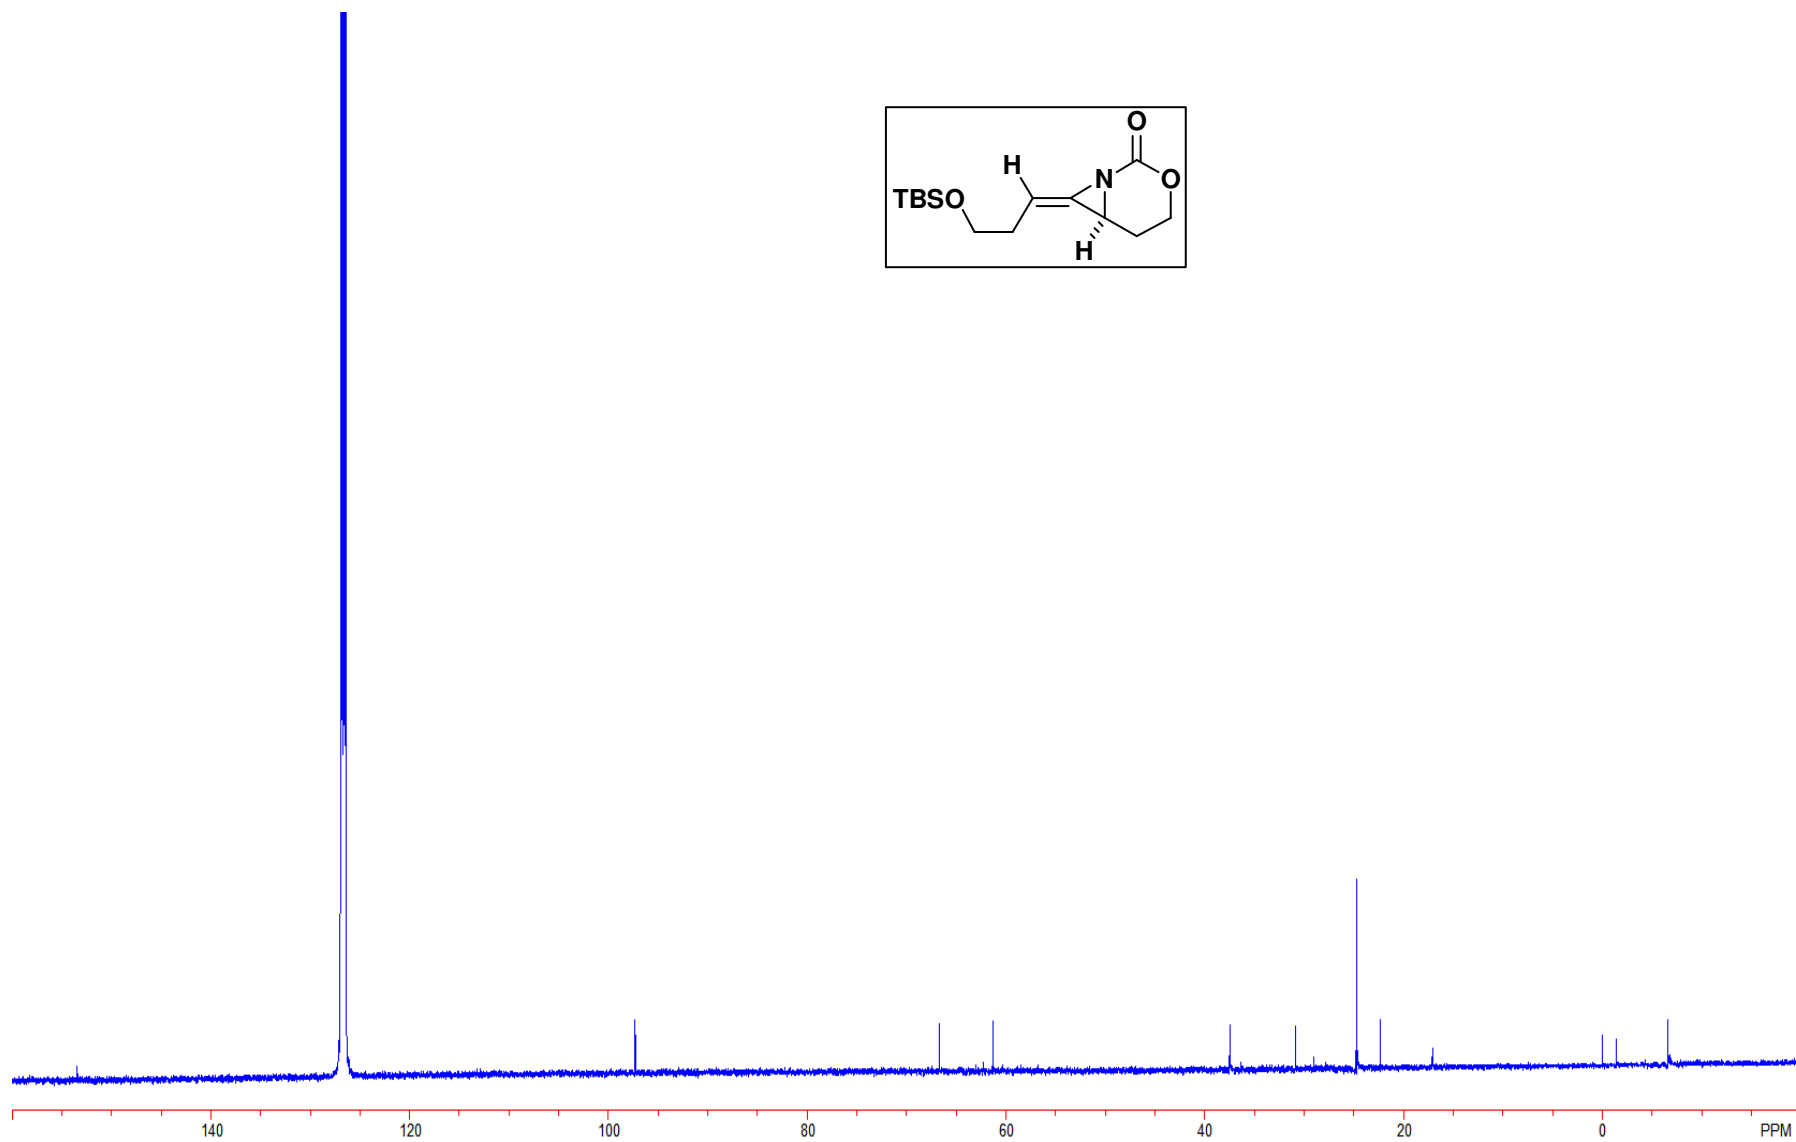

Compound 5a.

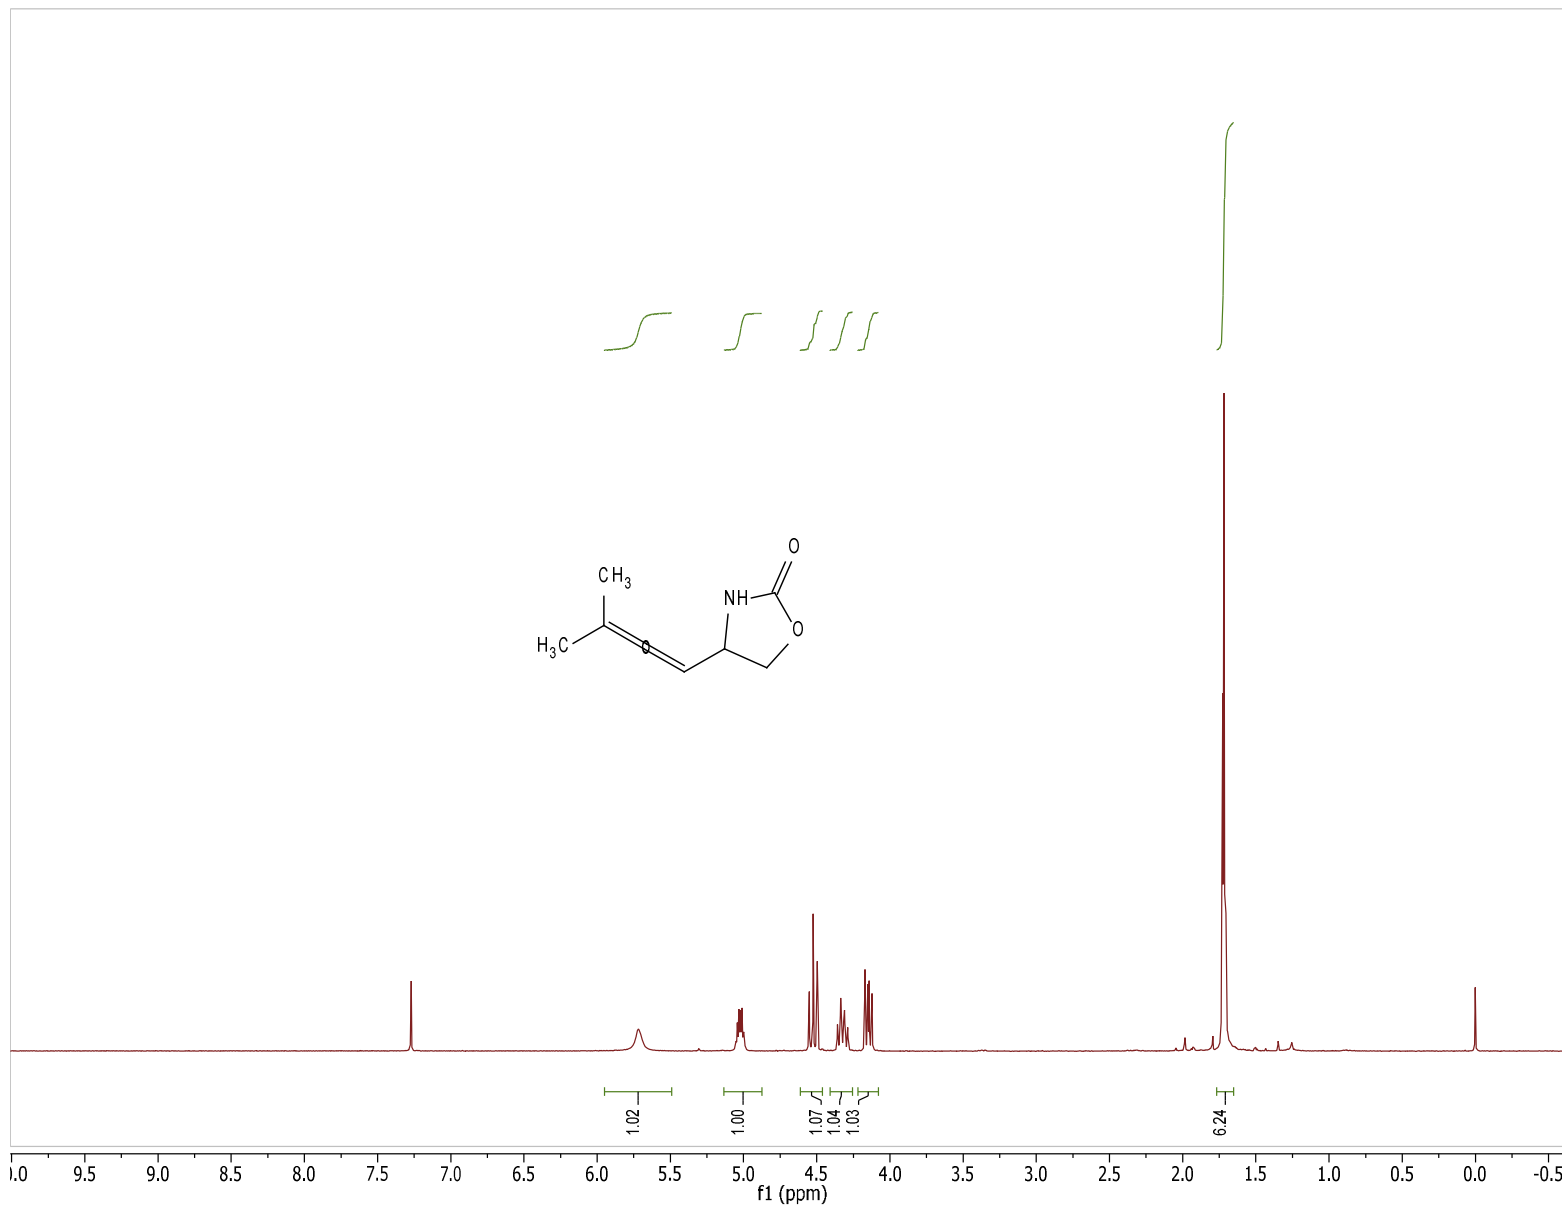

Compound 5b.

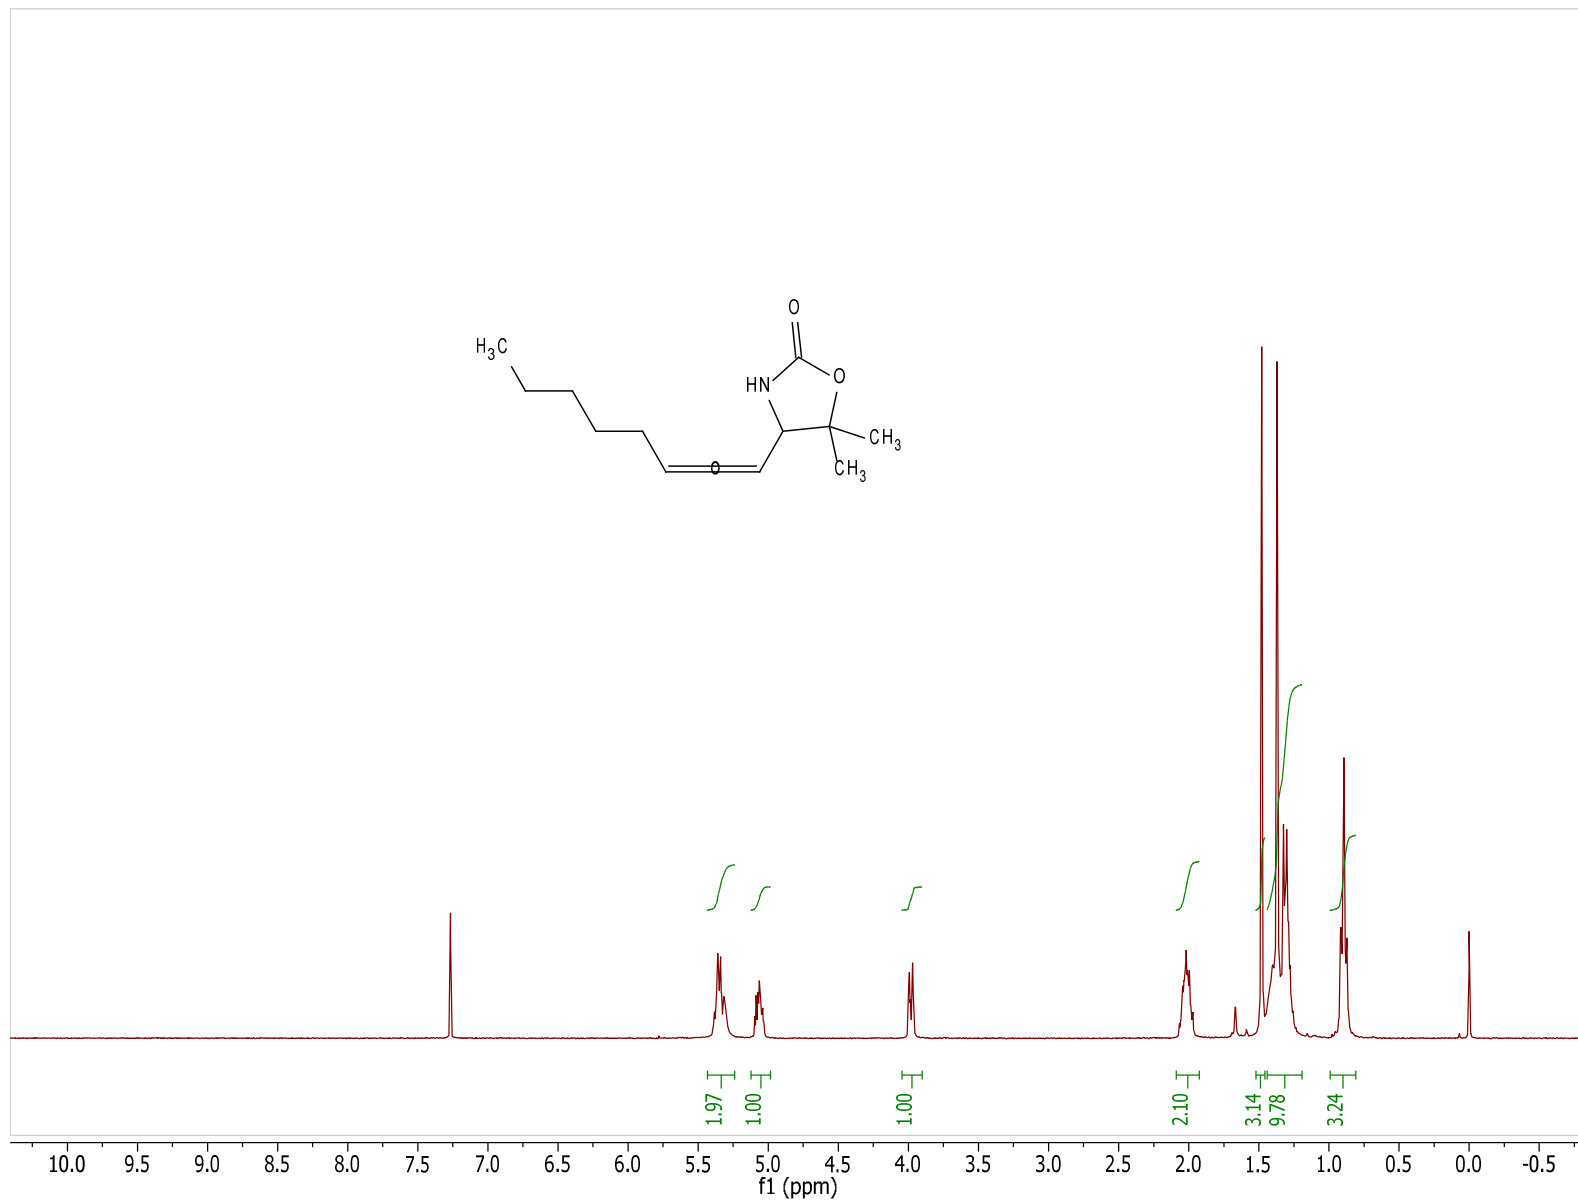

Compound 5c.

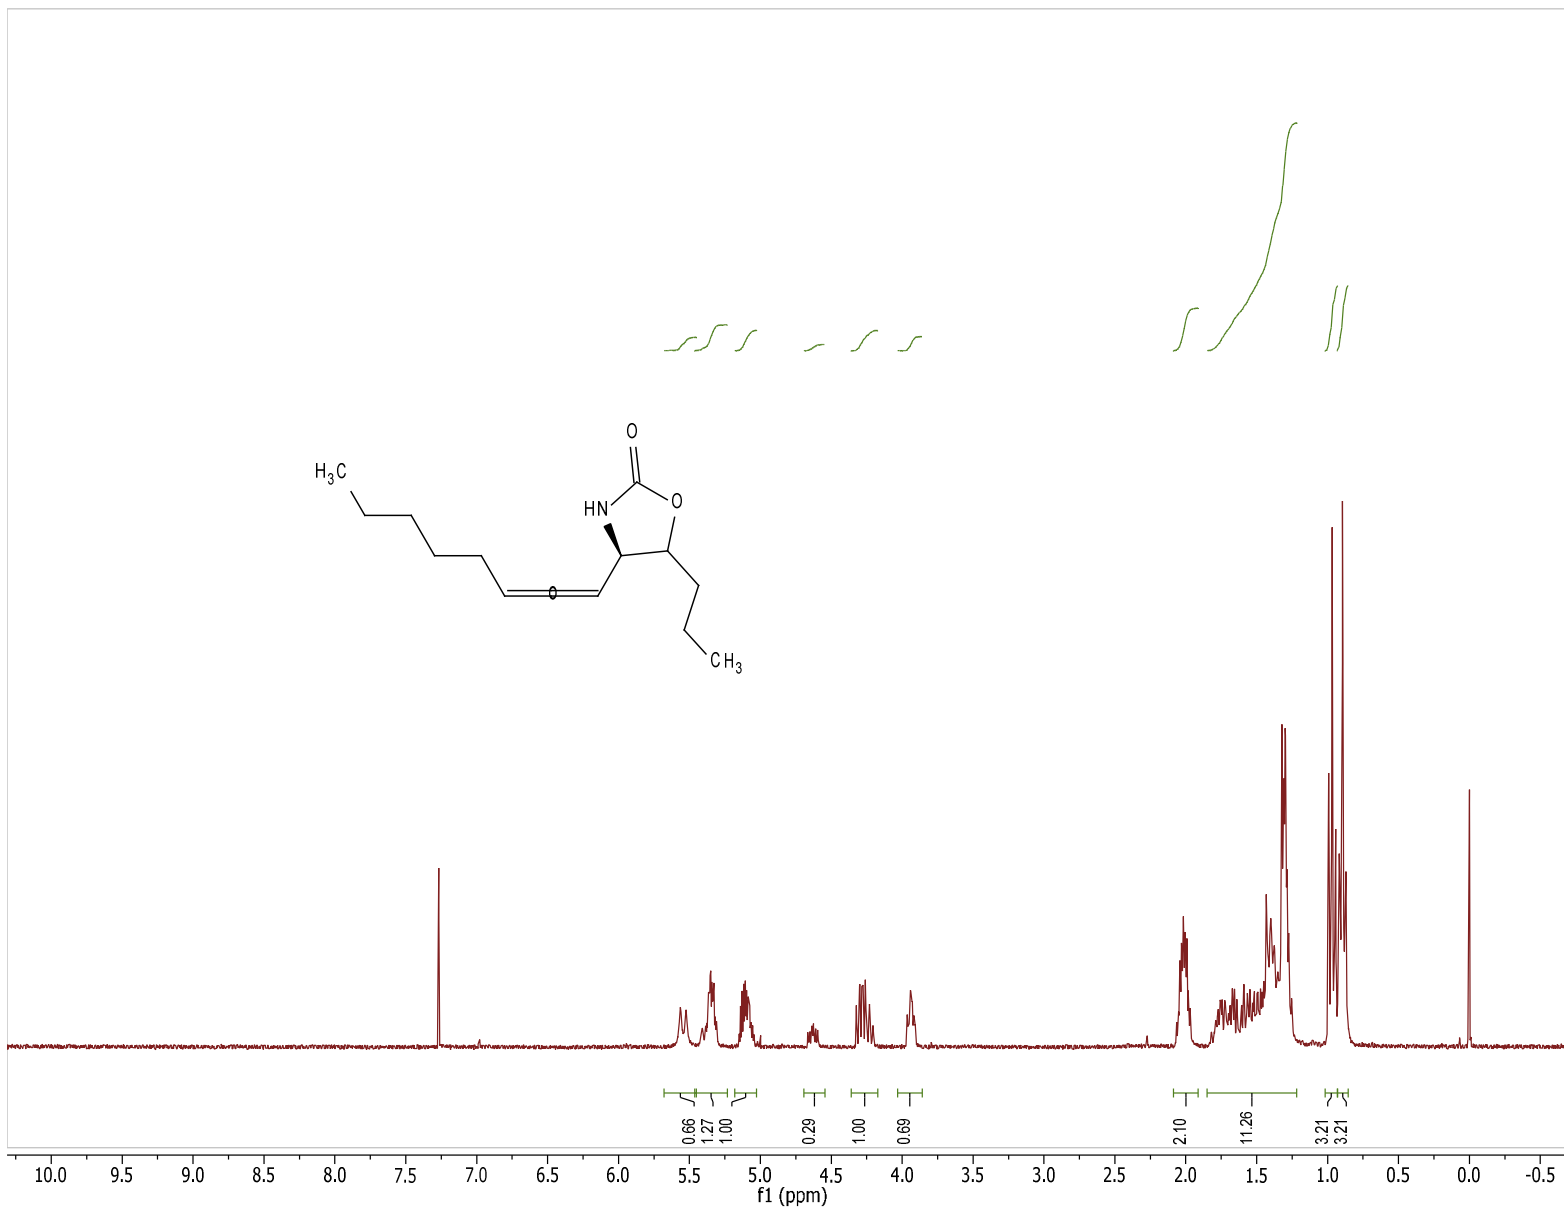

Compound 5d.

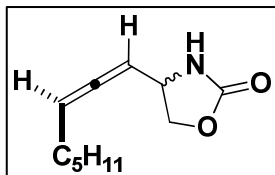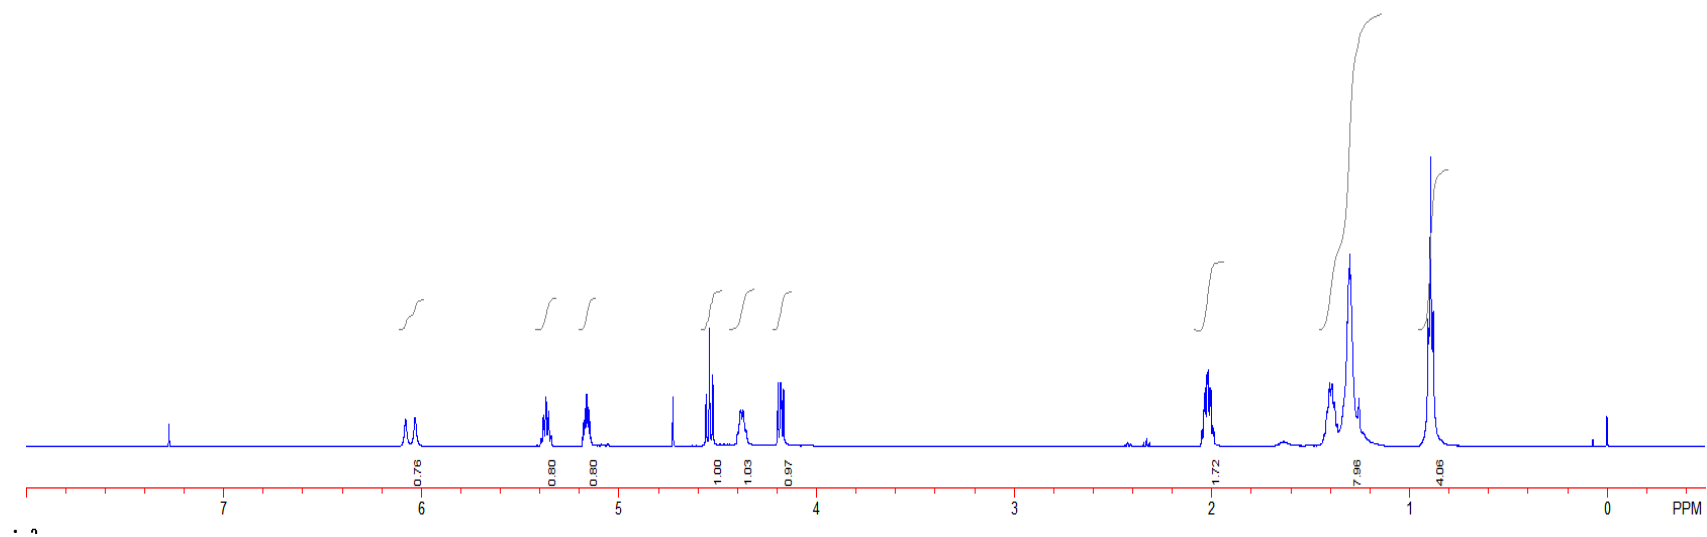

Compound 5e.

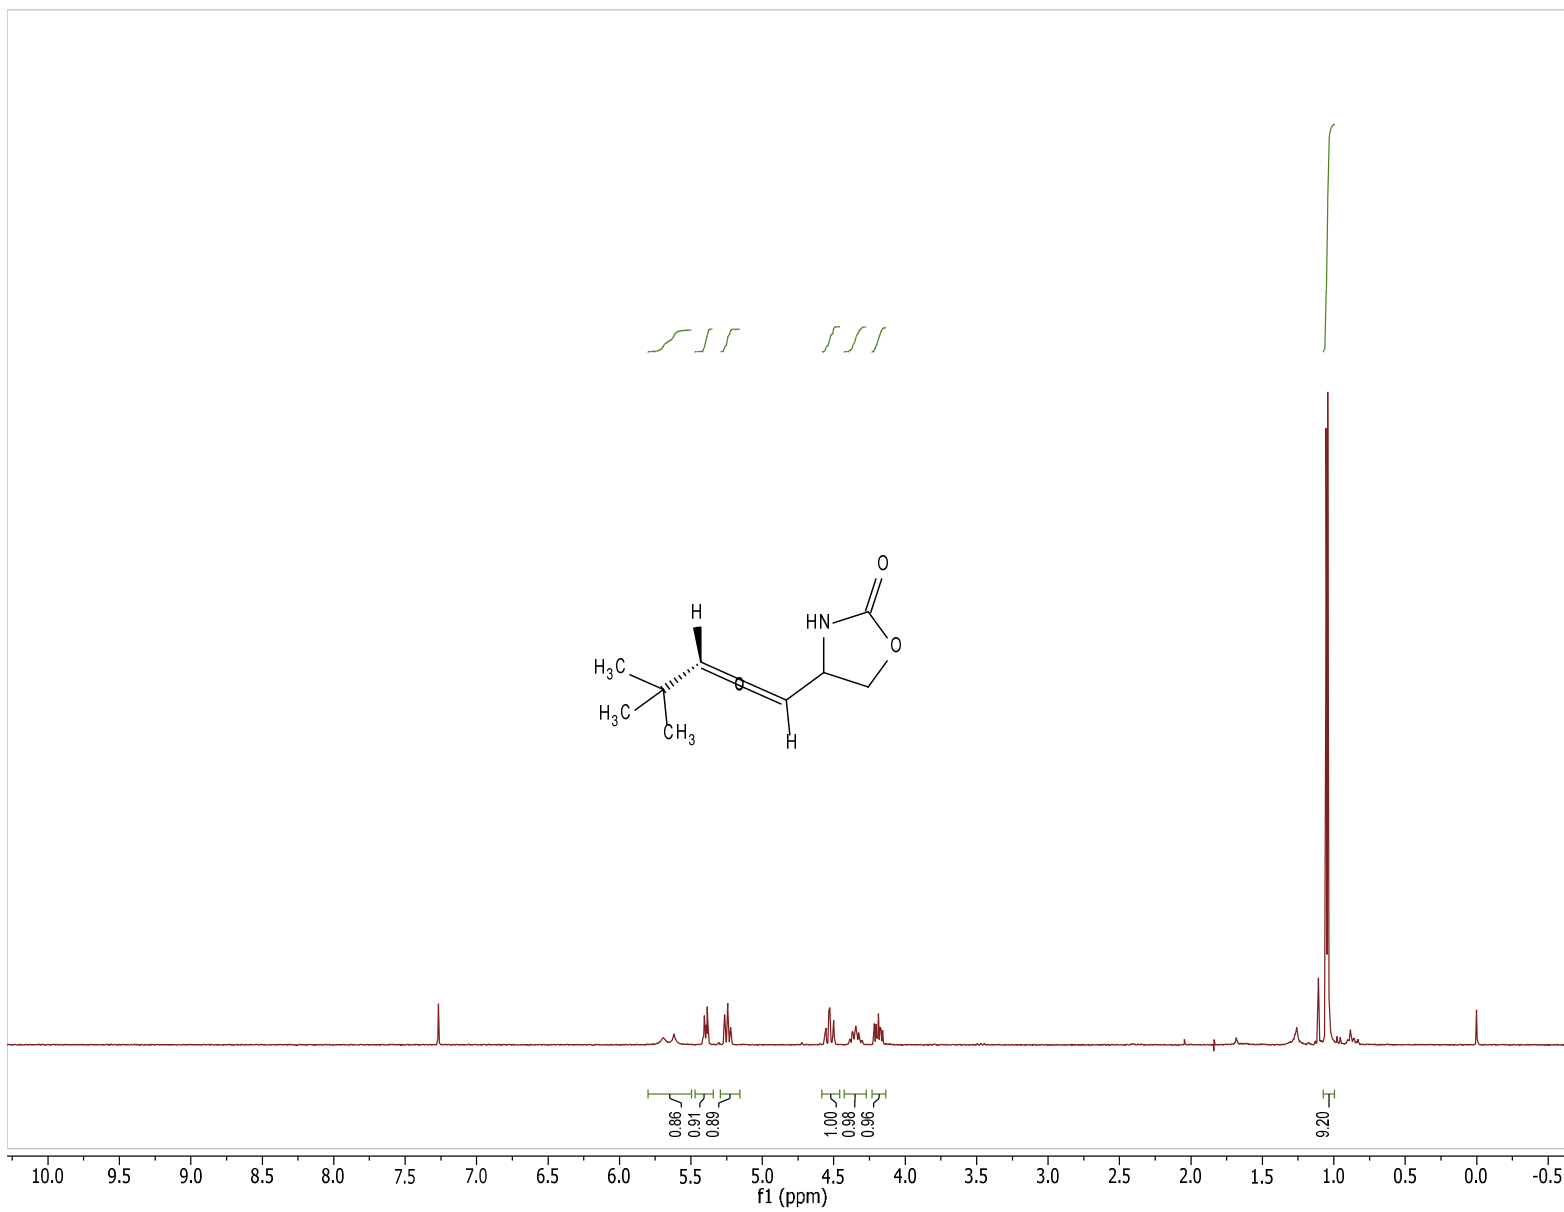

Compound 5f.

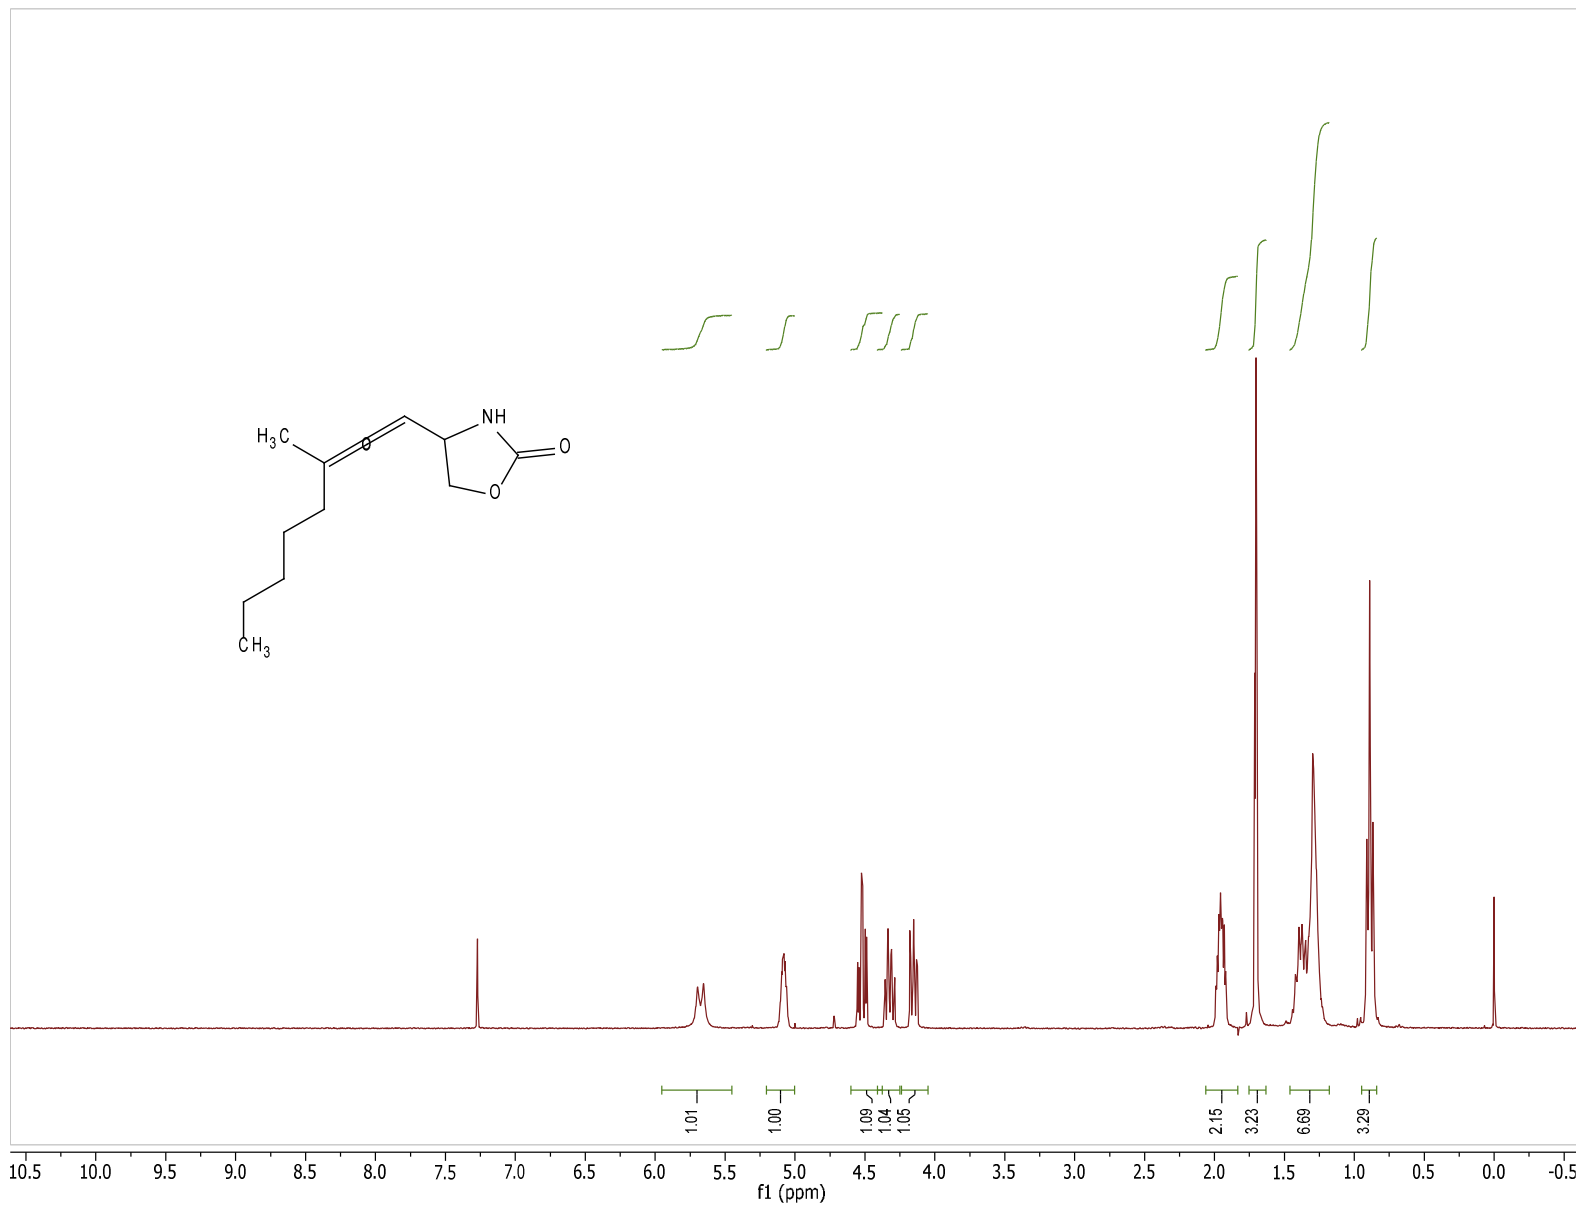

Compound 5g.

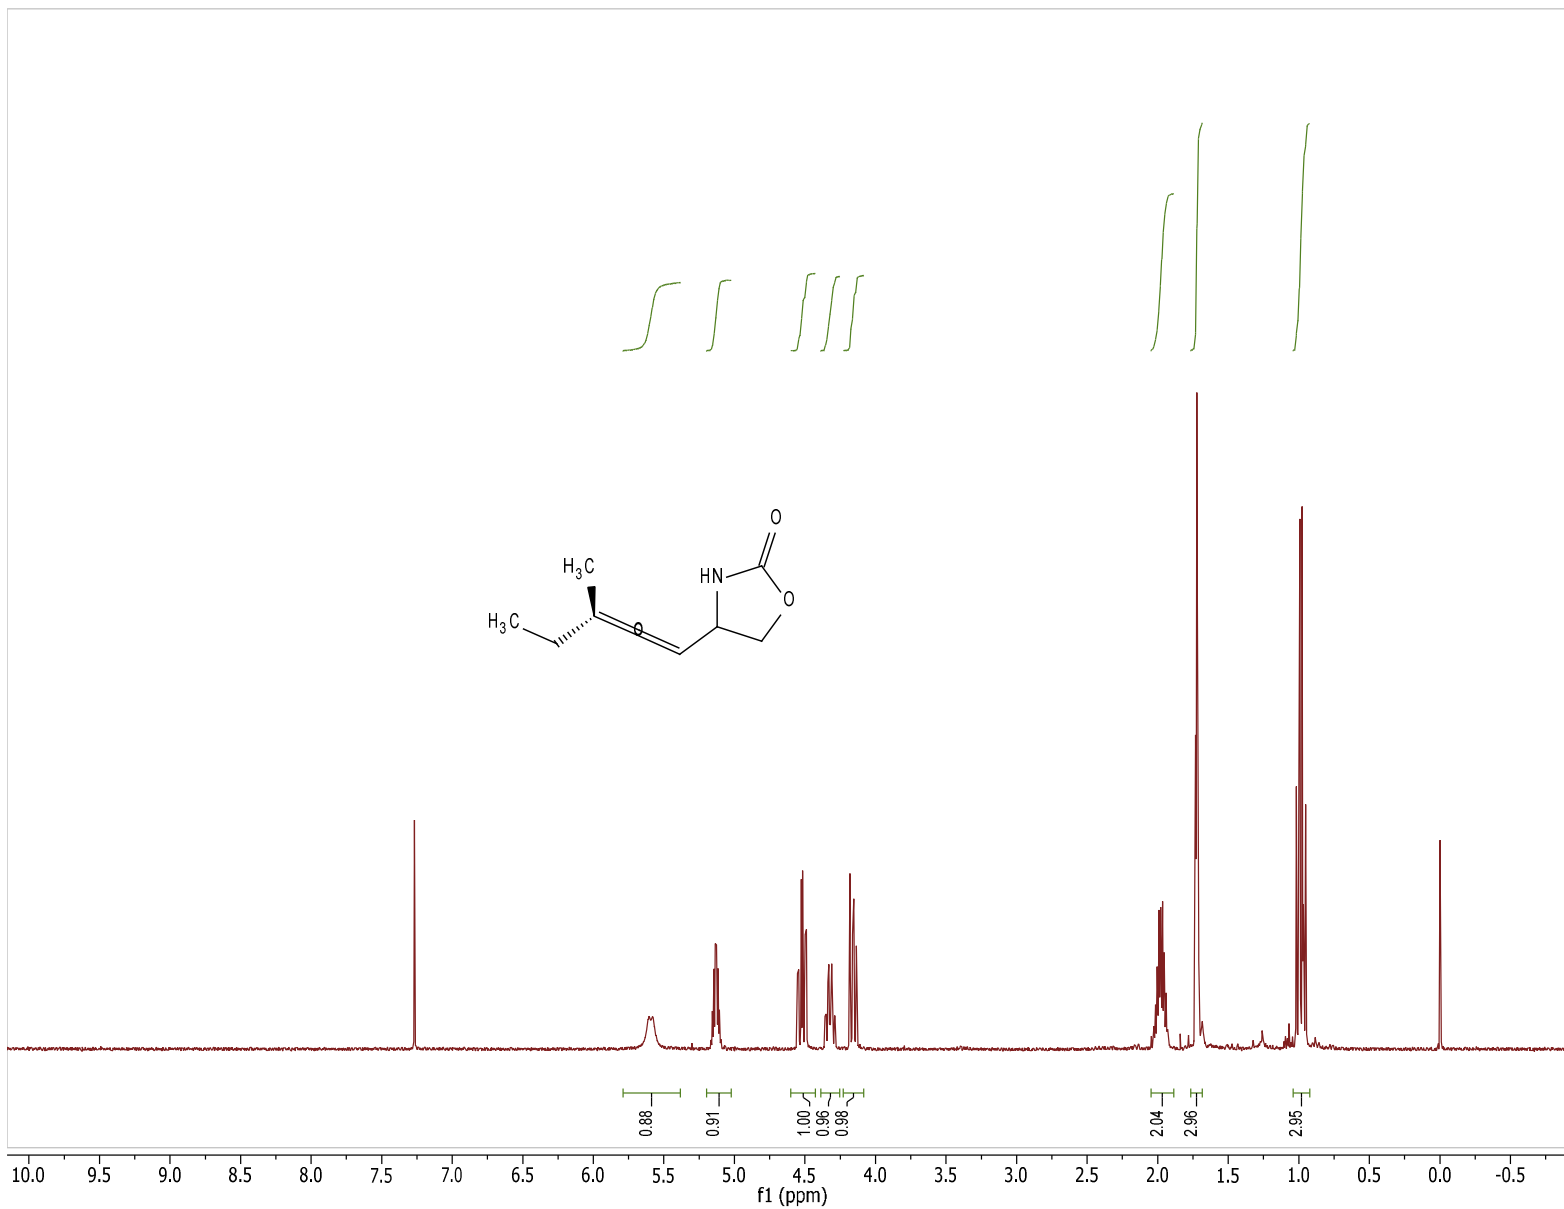



Compound 5h.

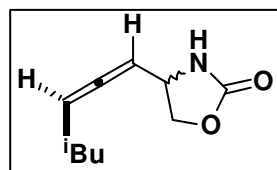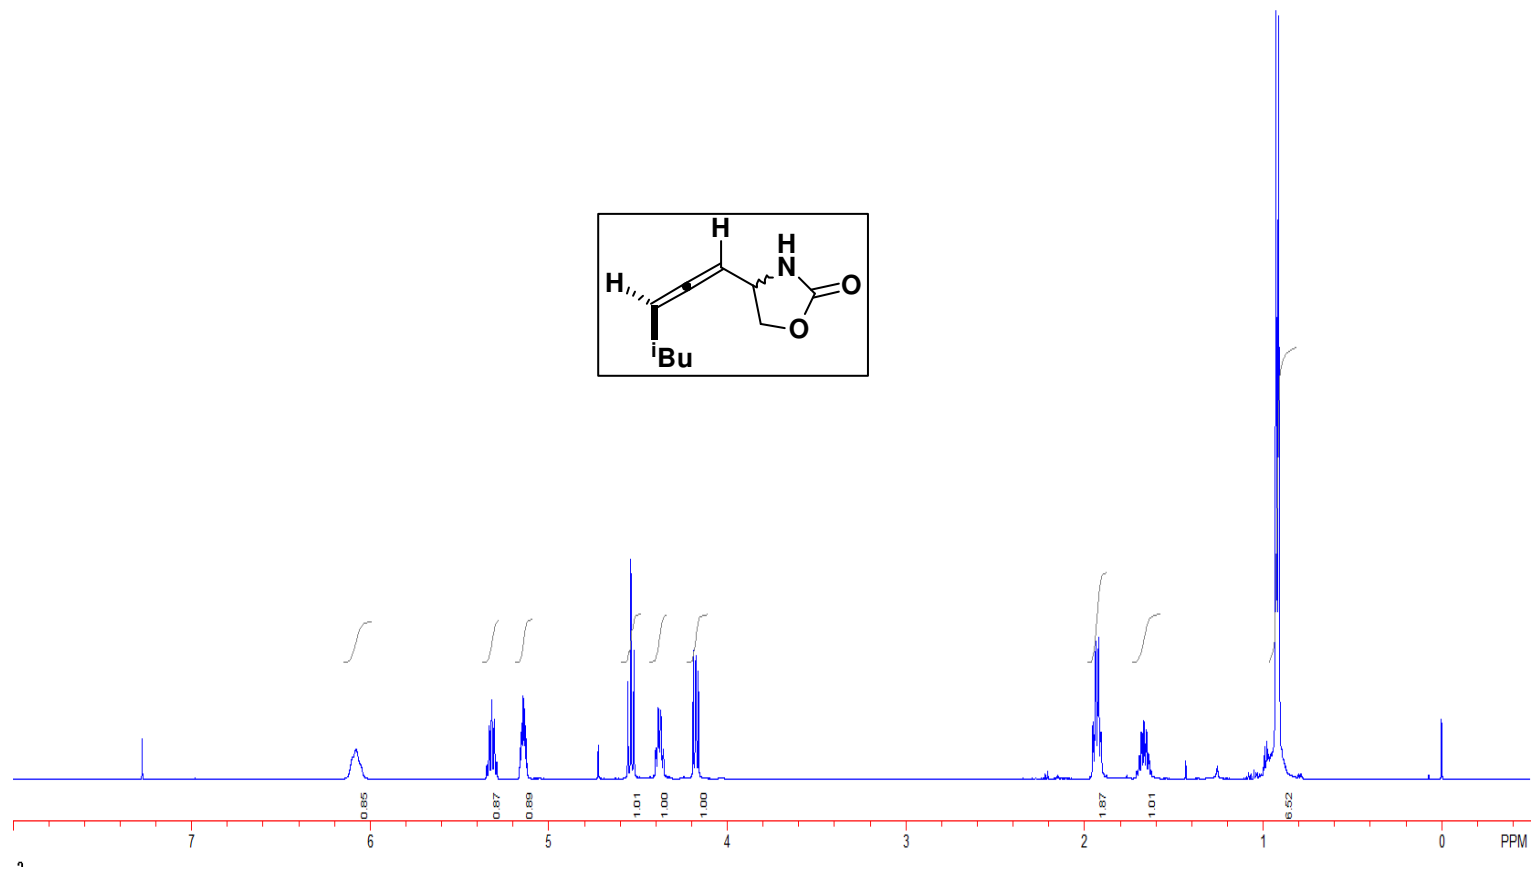

Compound 5h.

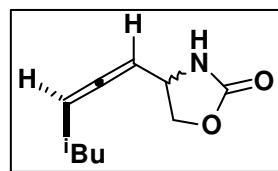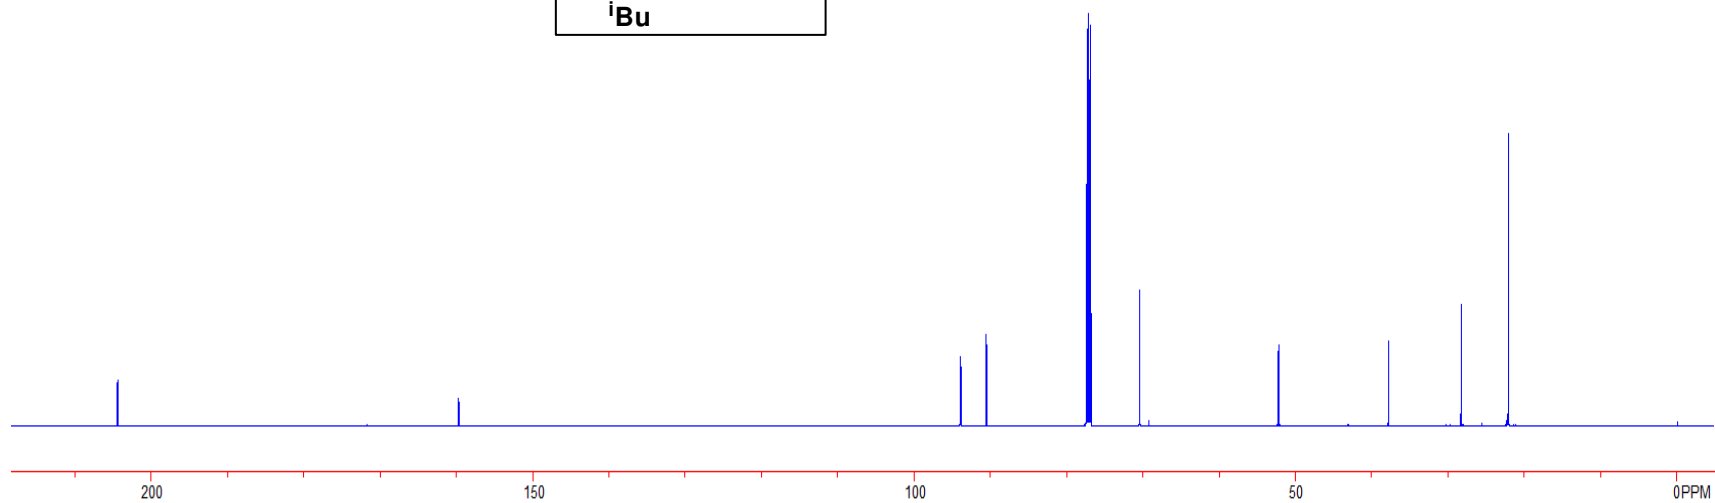

Compound 5i.

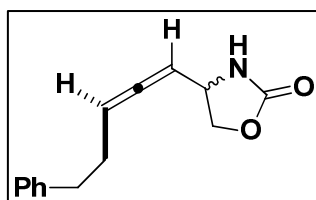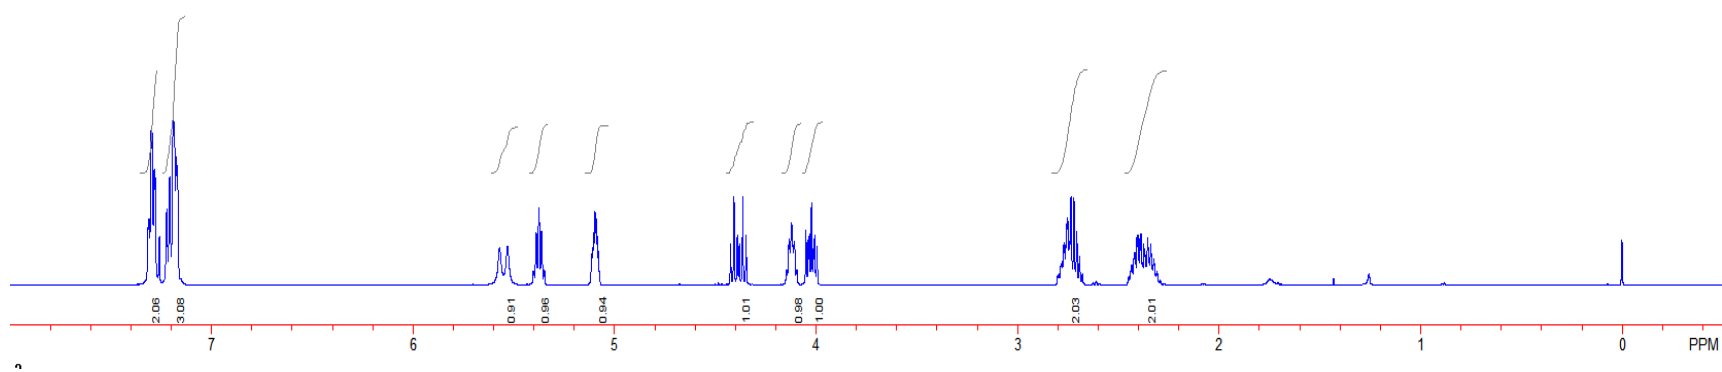

Compound 5j.

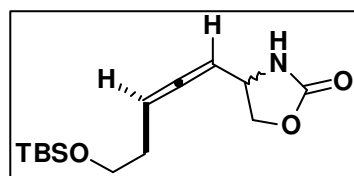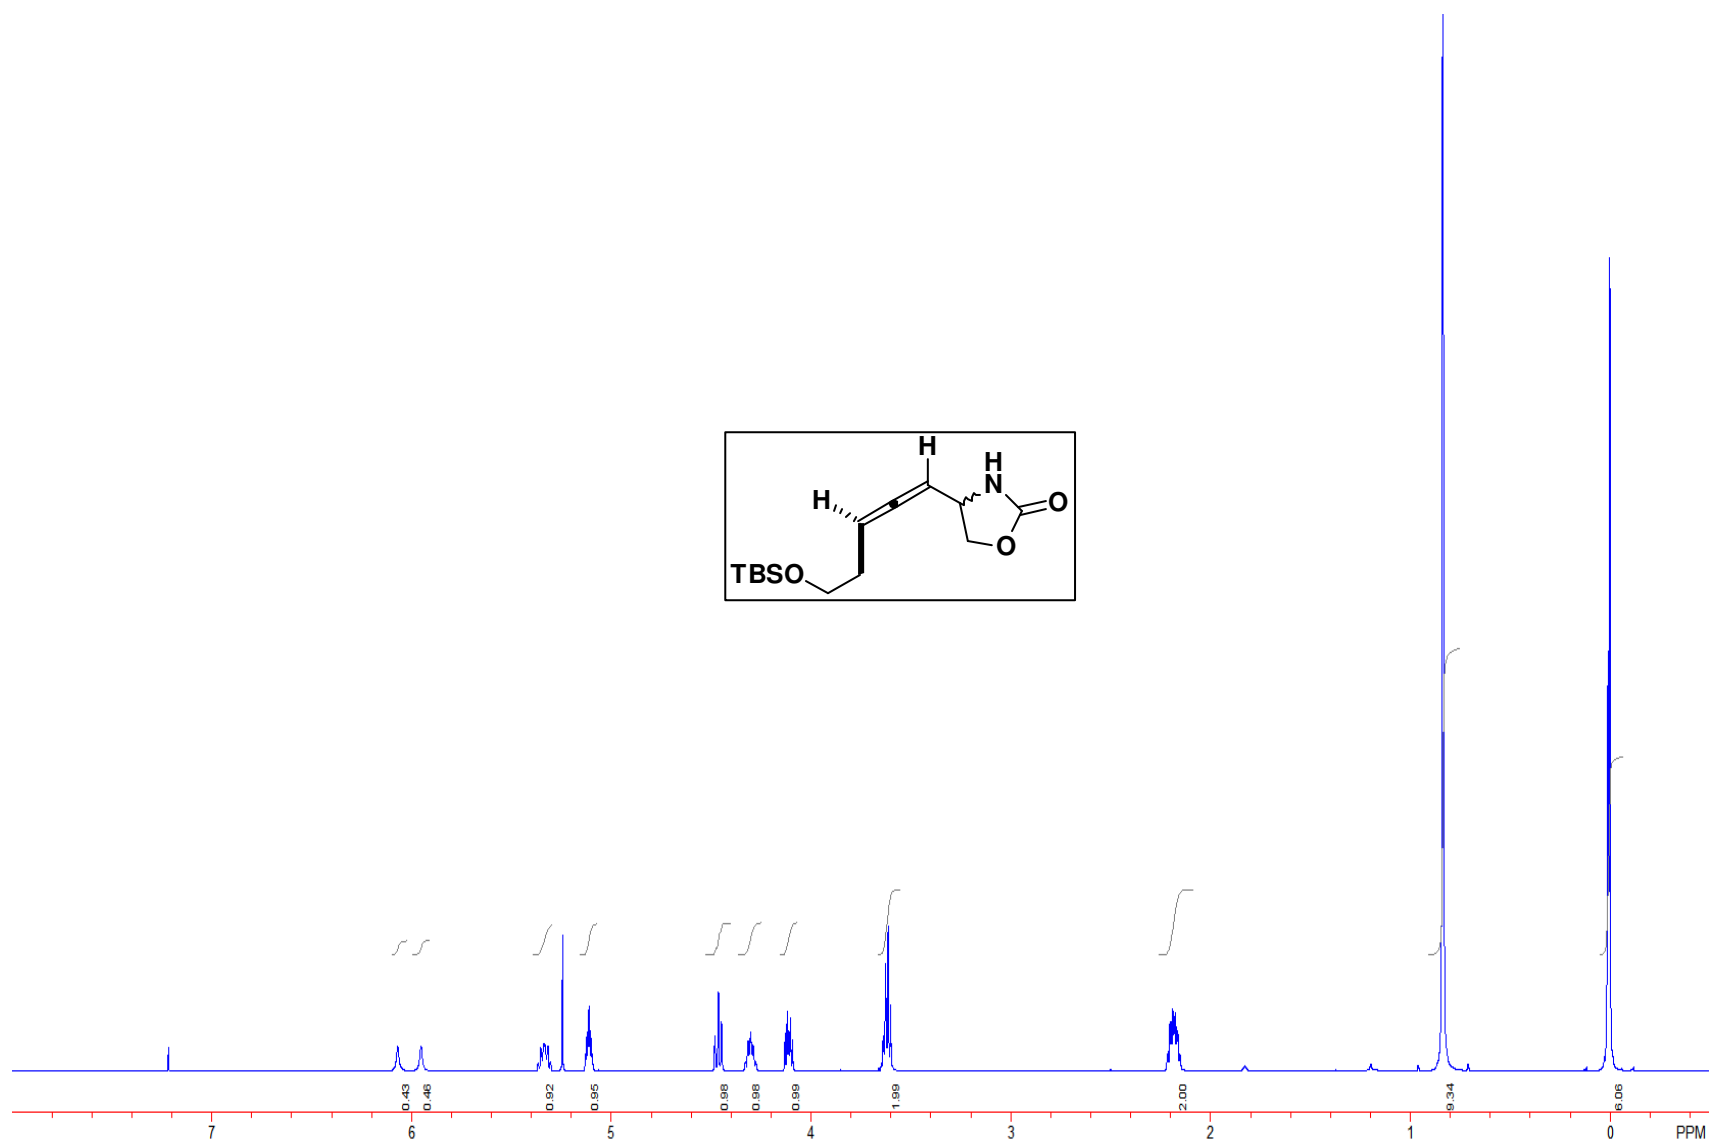

Compound 5j.

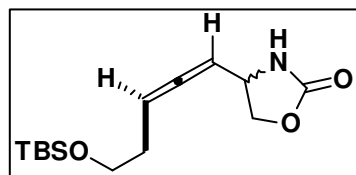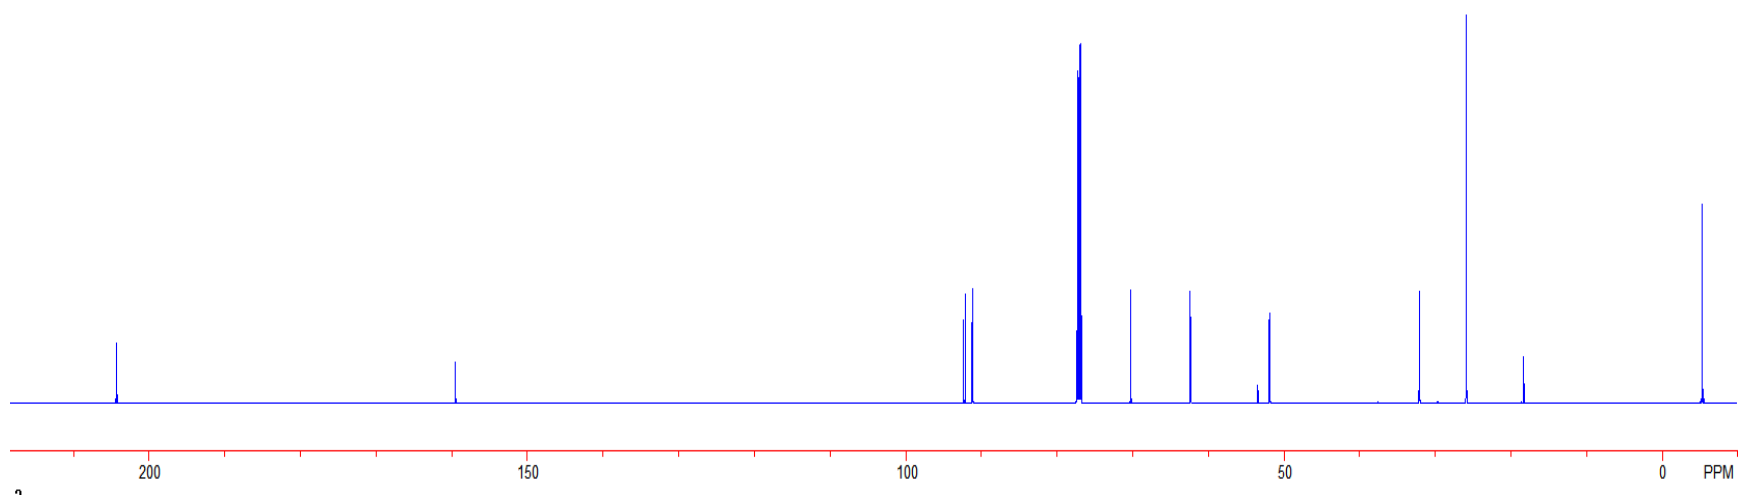

Compound 6b.

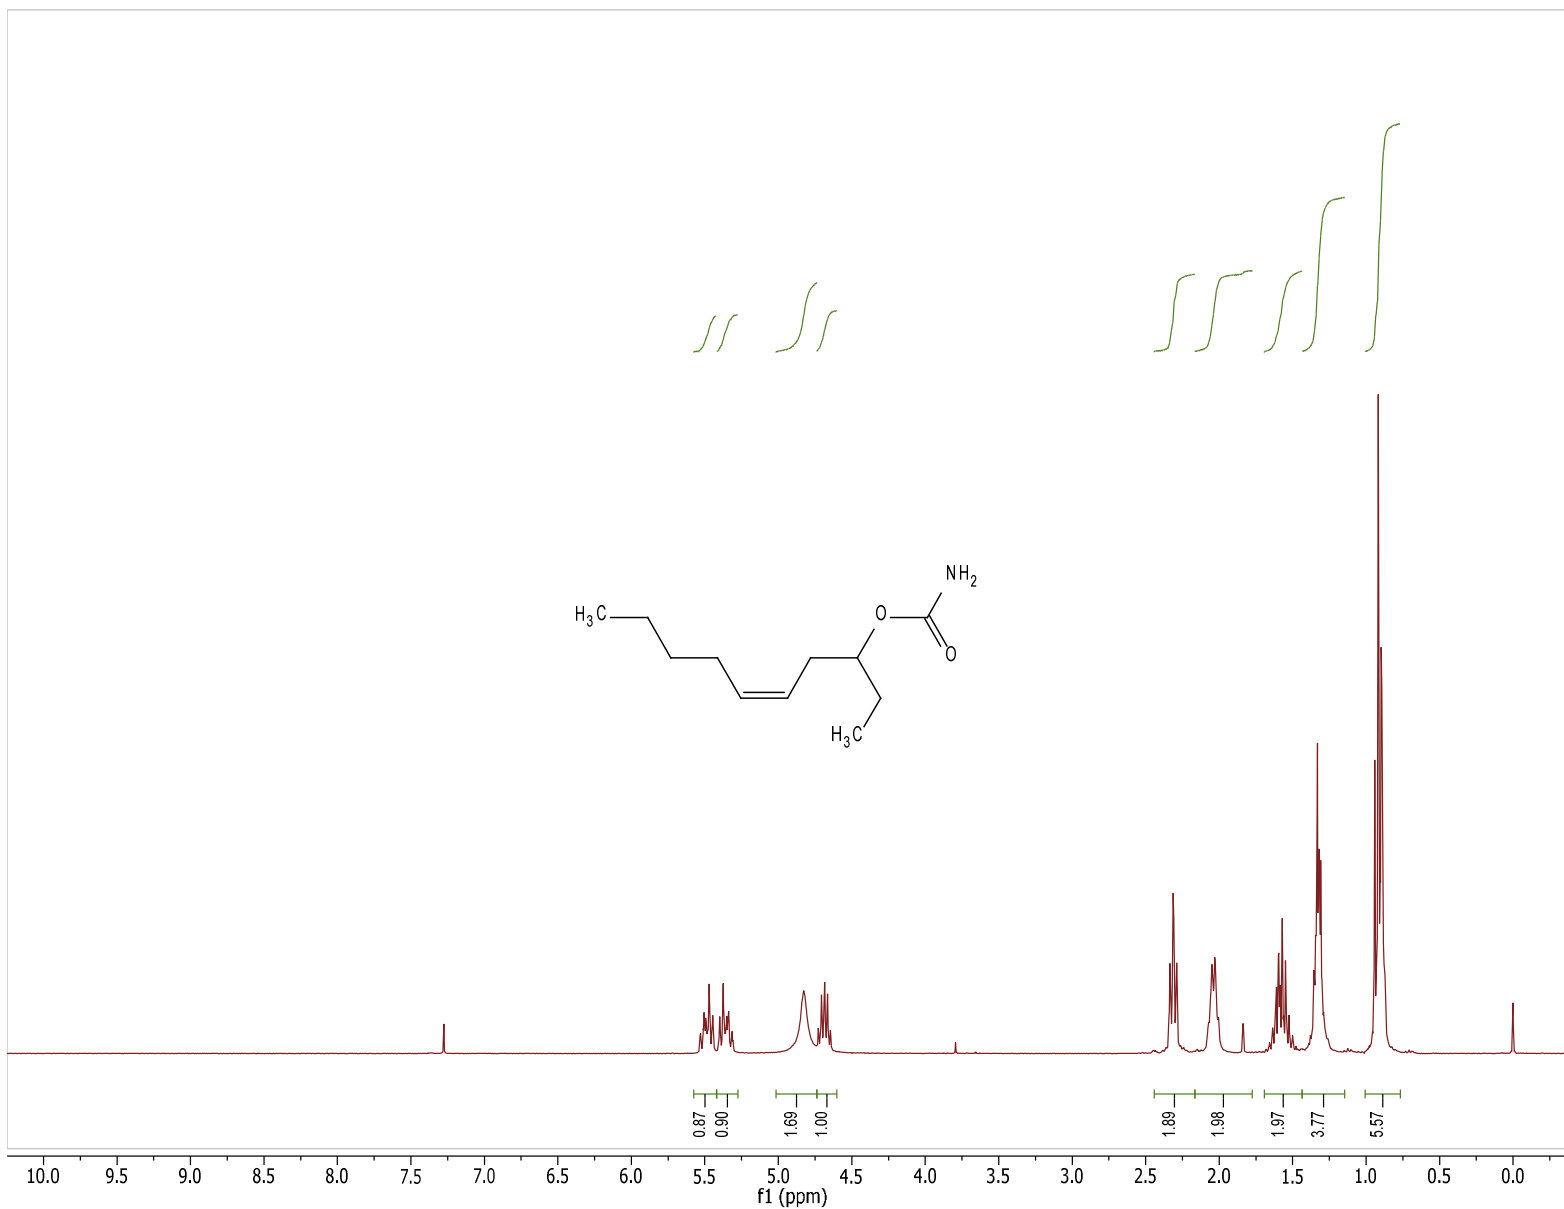

Compound 6b.

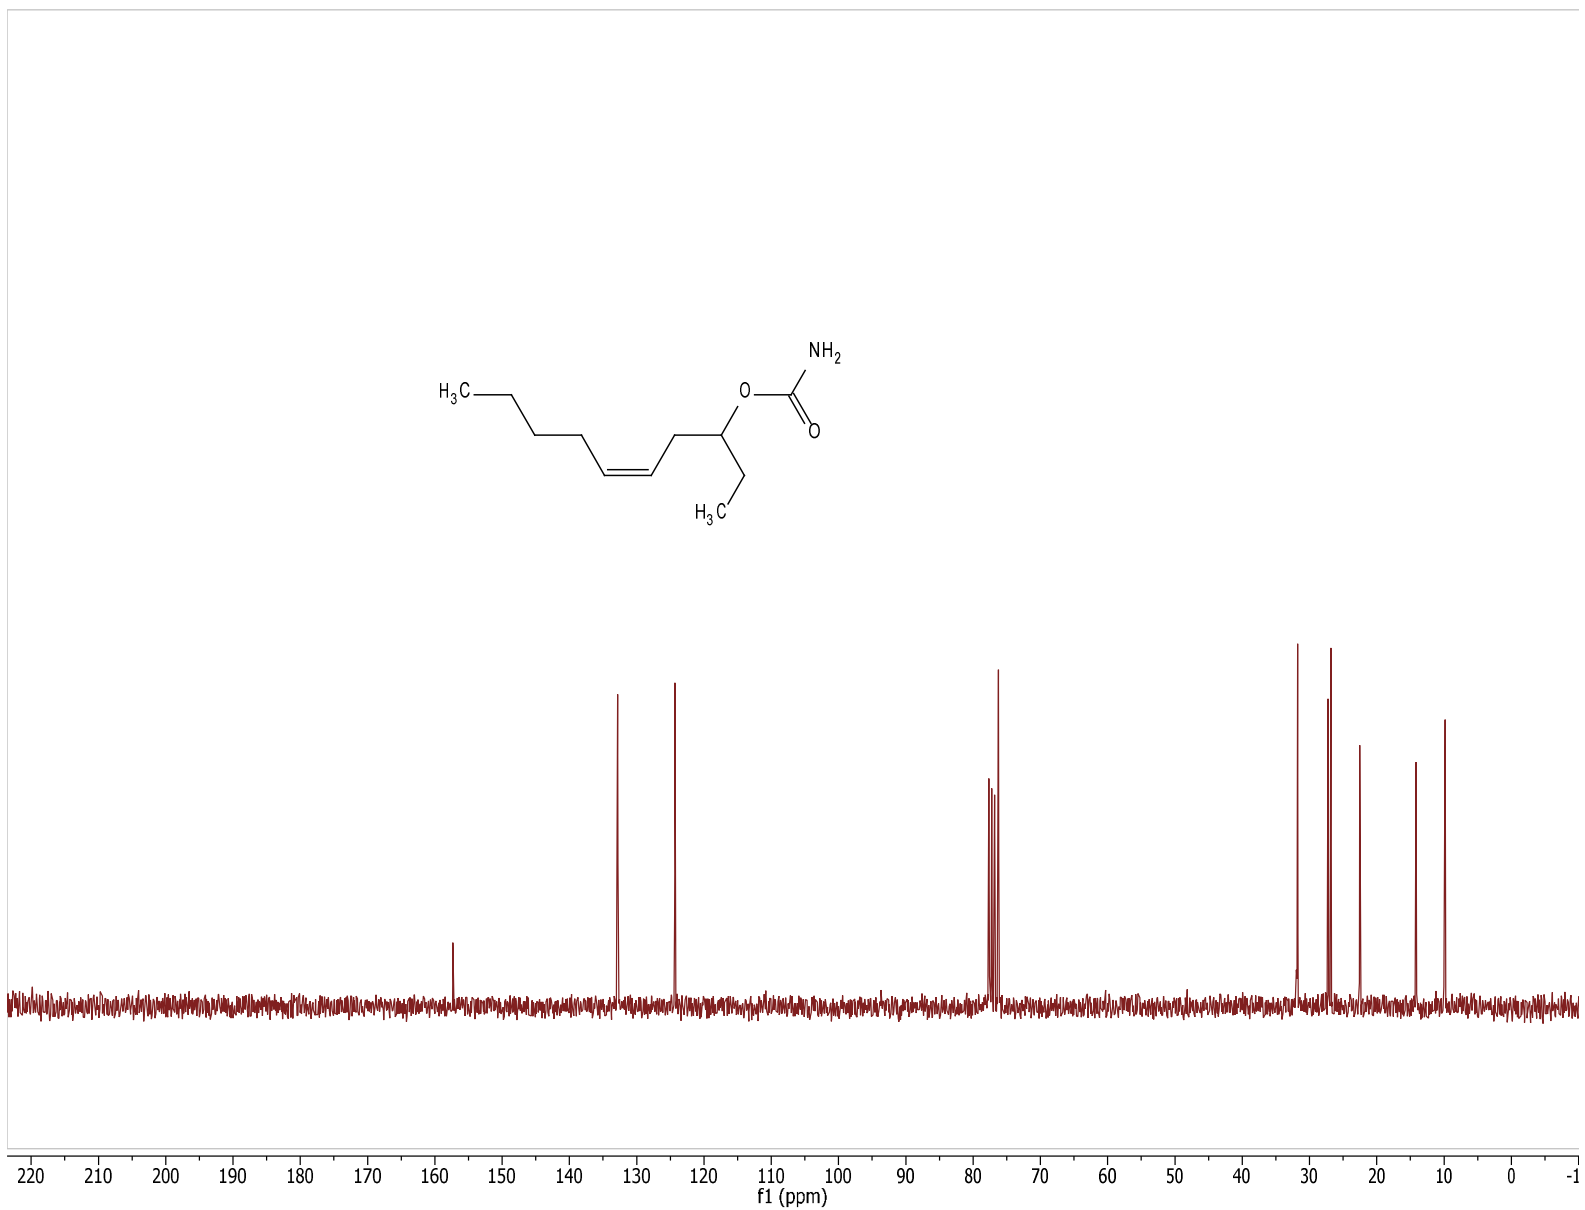

Compound 6e.

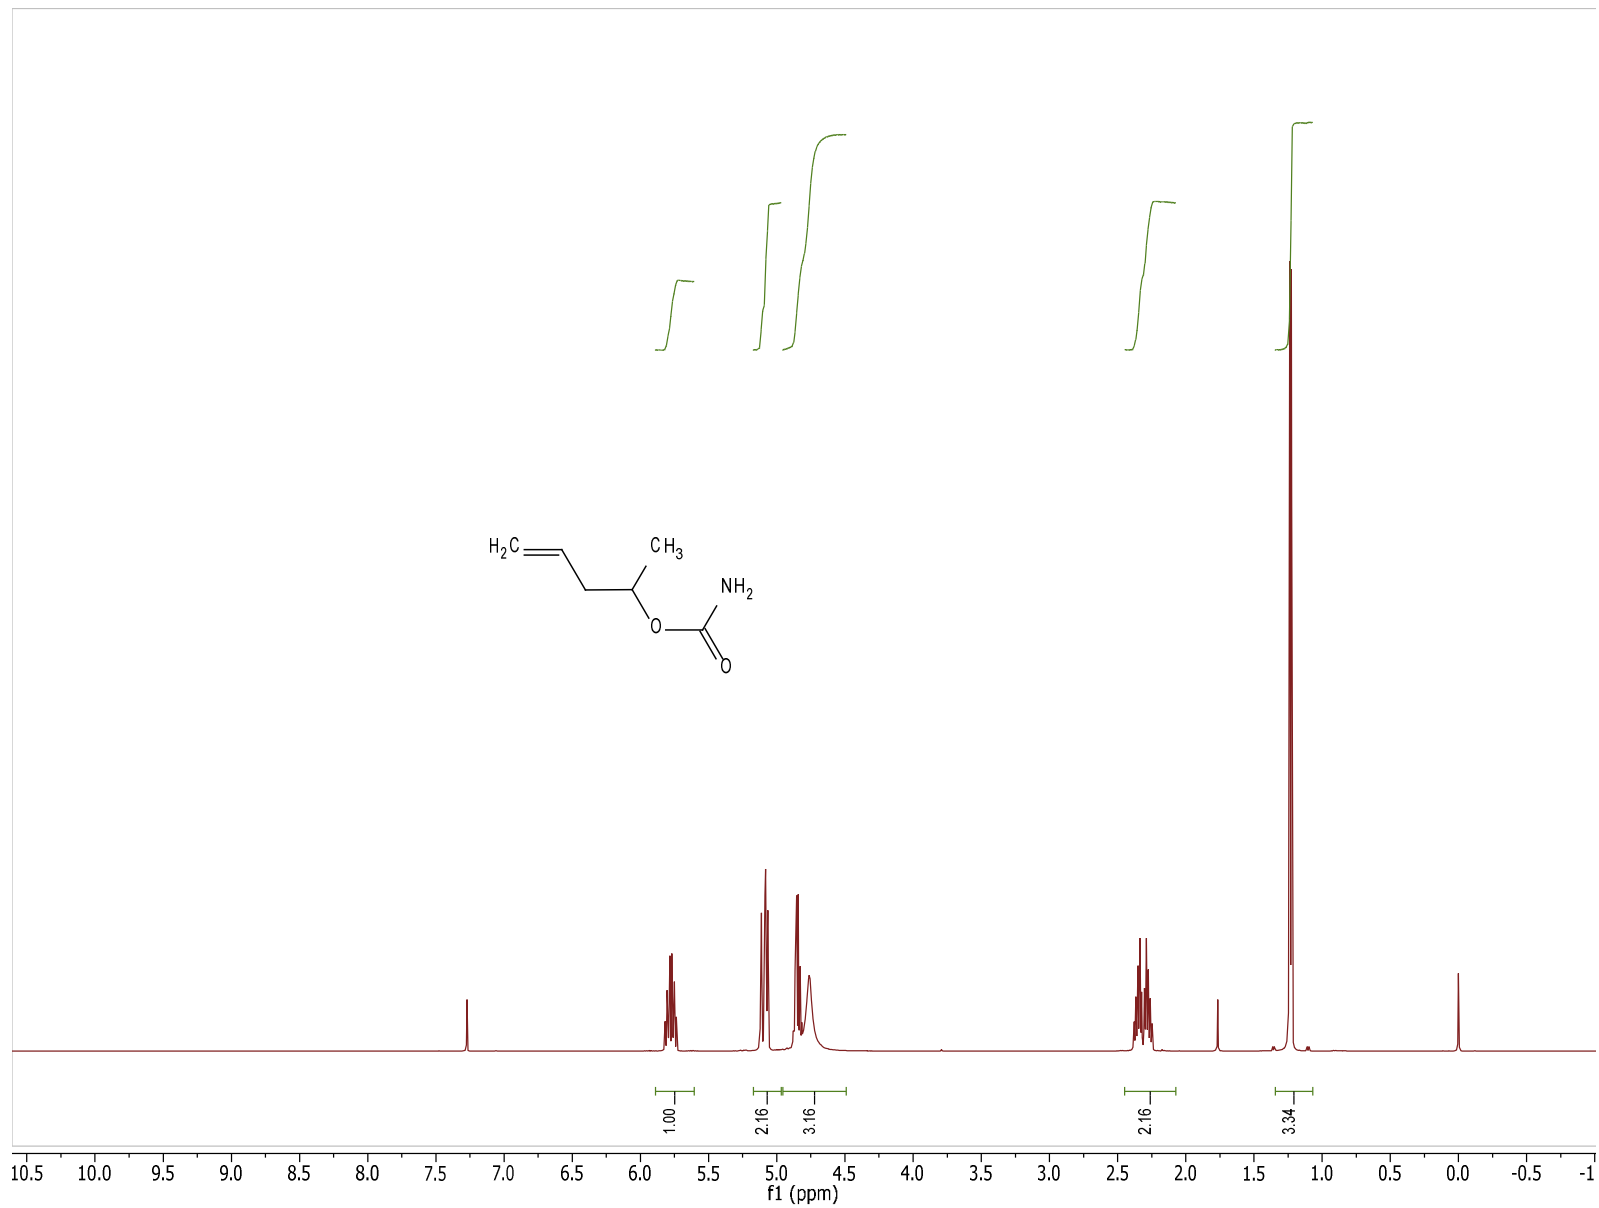



Compound 6e.

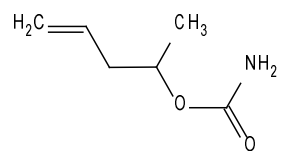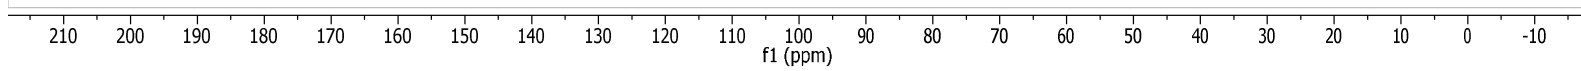

Compound 7a.

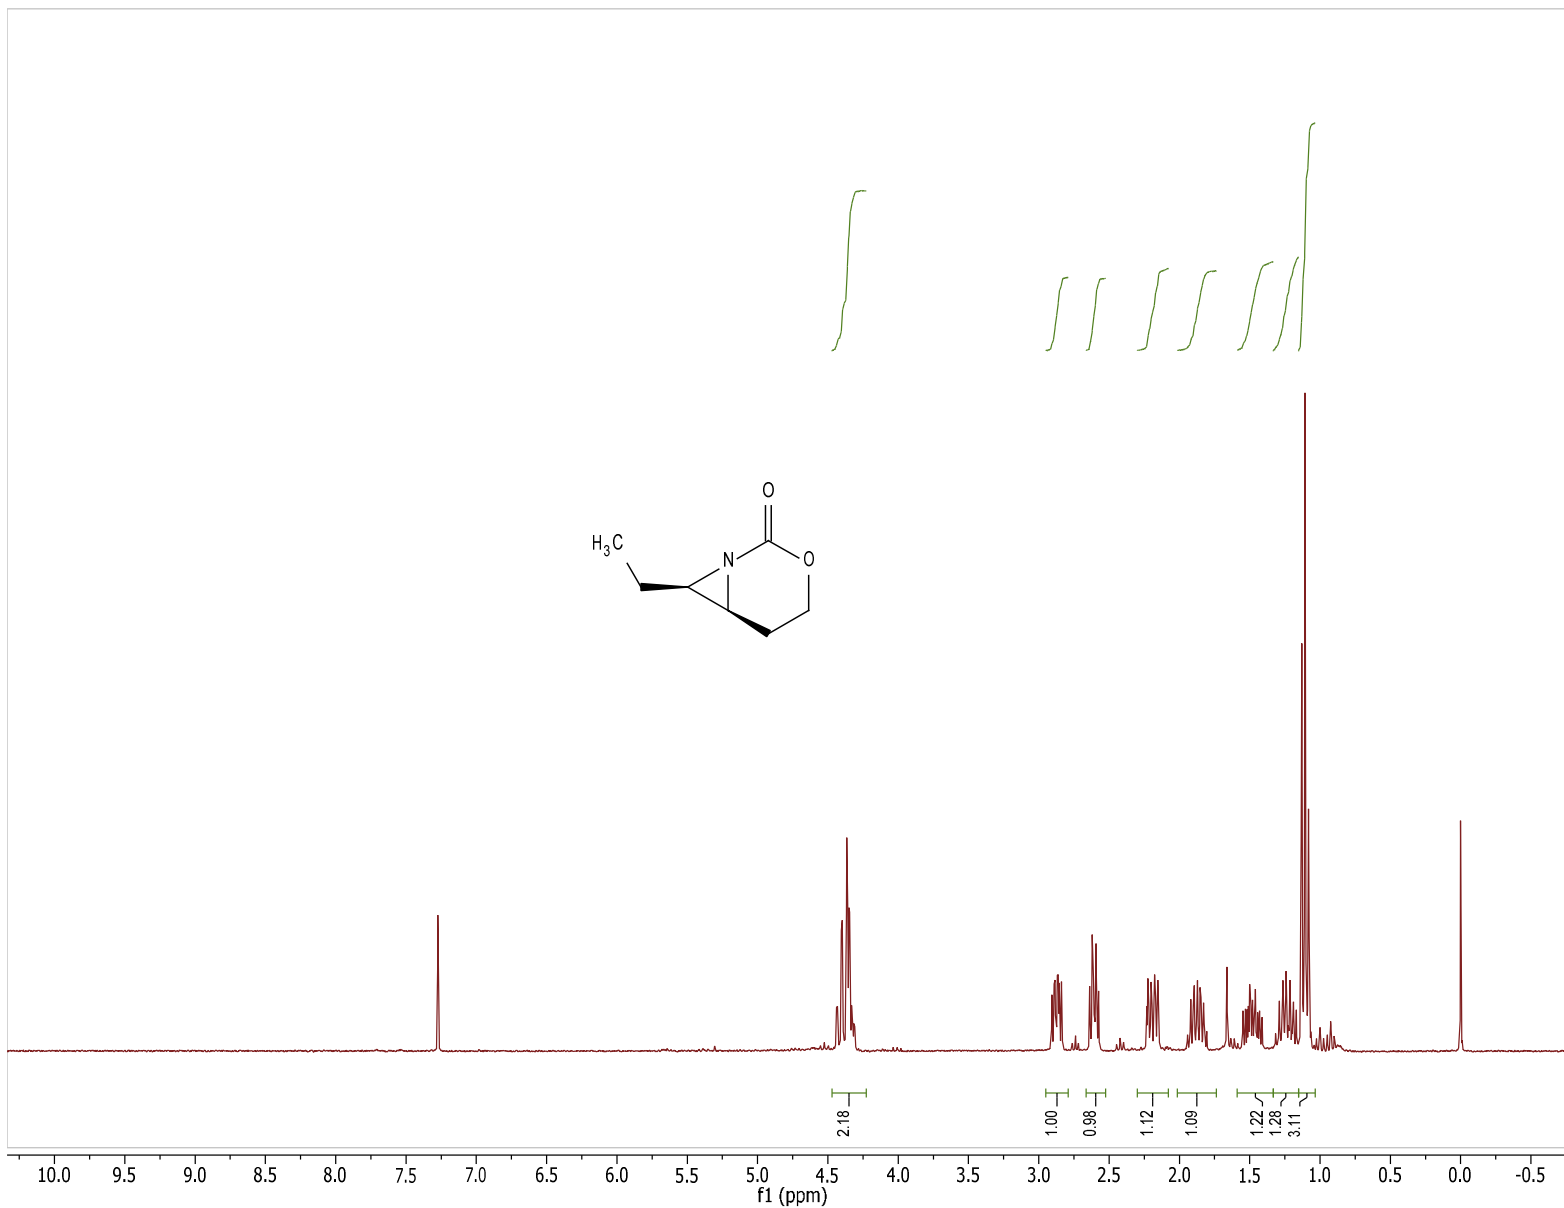

Compound 7b.

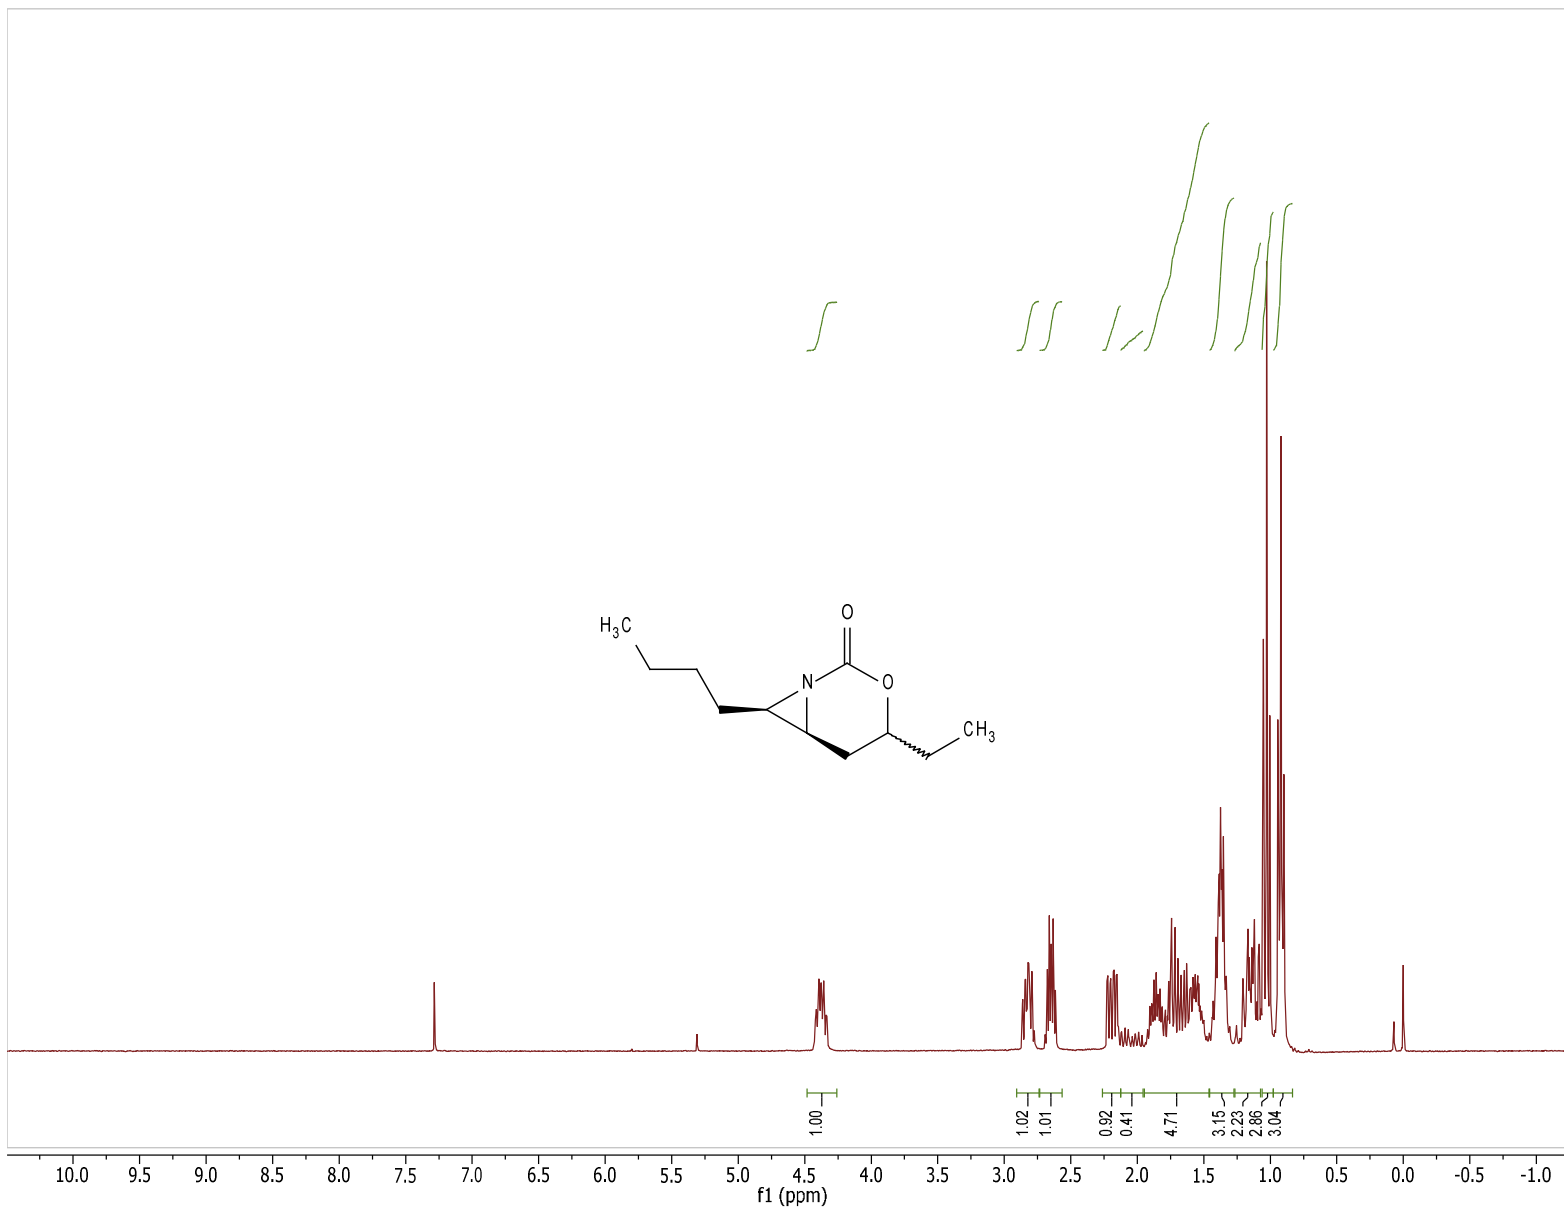

Compound 7b.

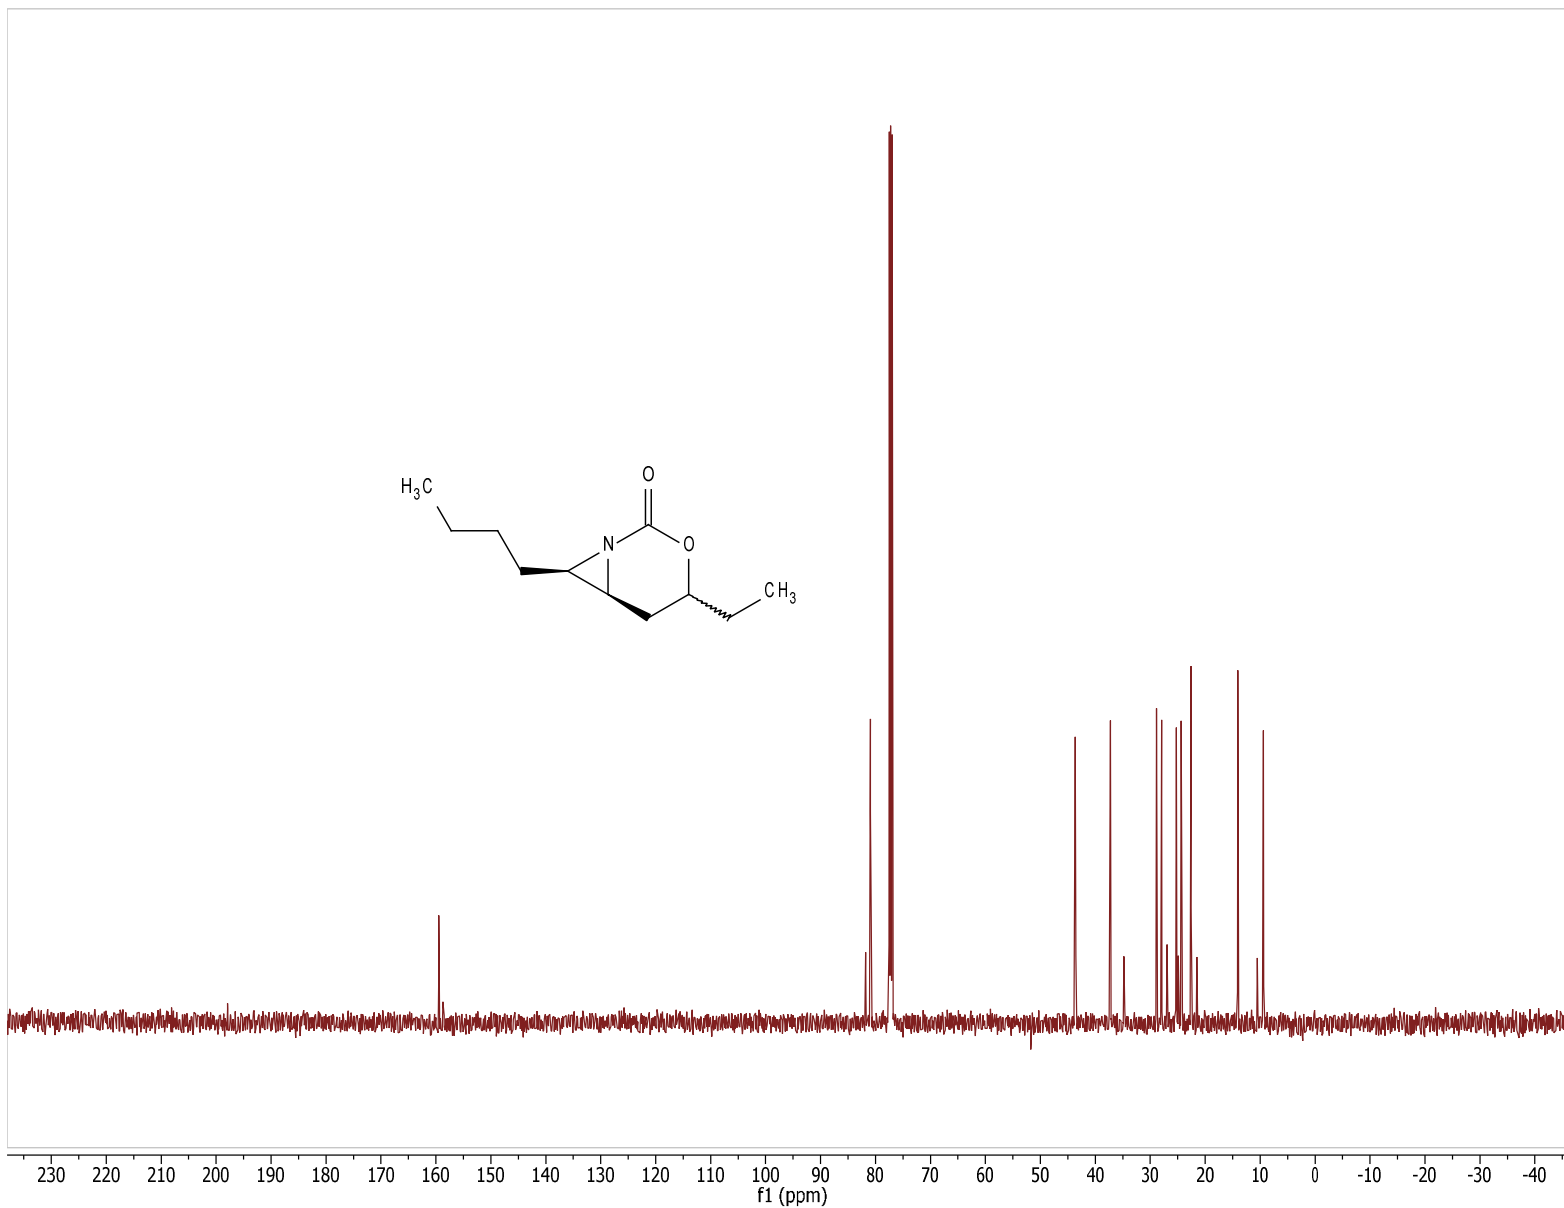

Compound 7c.

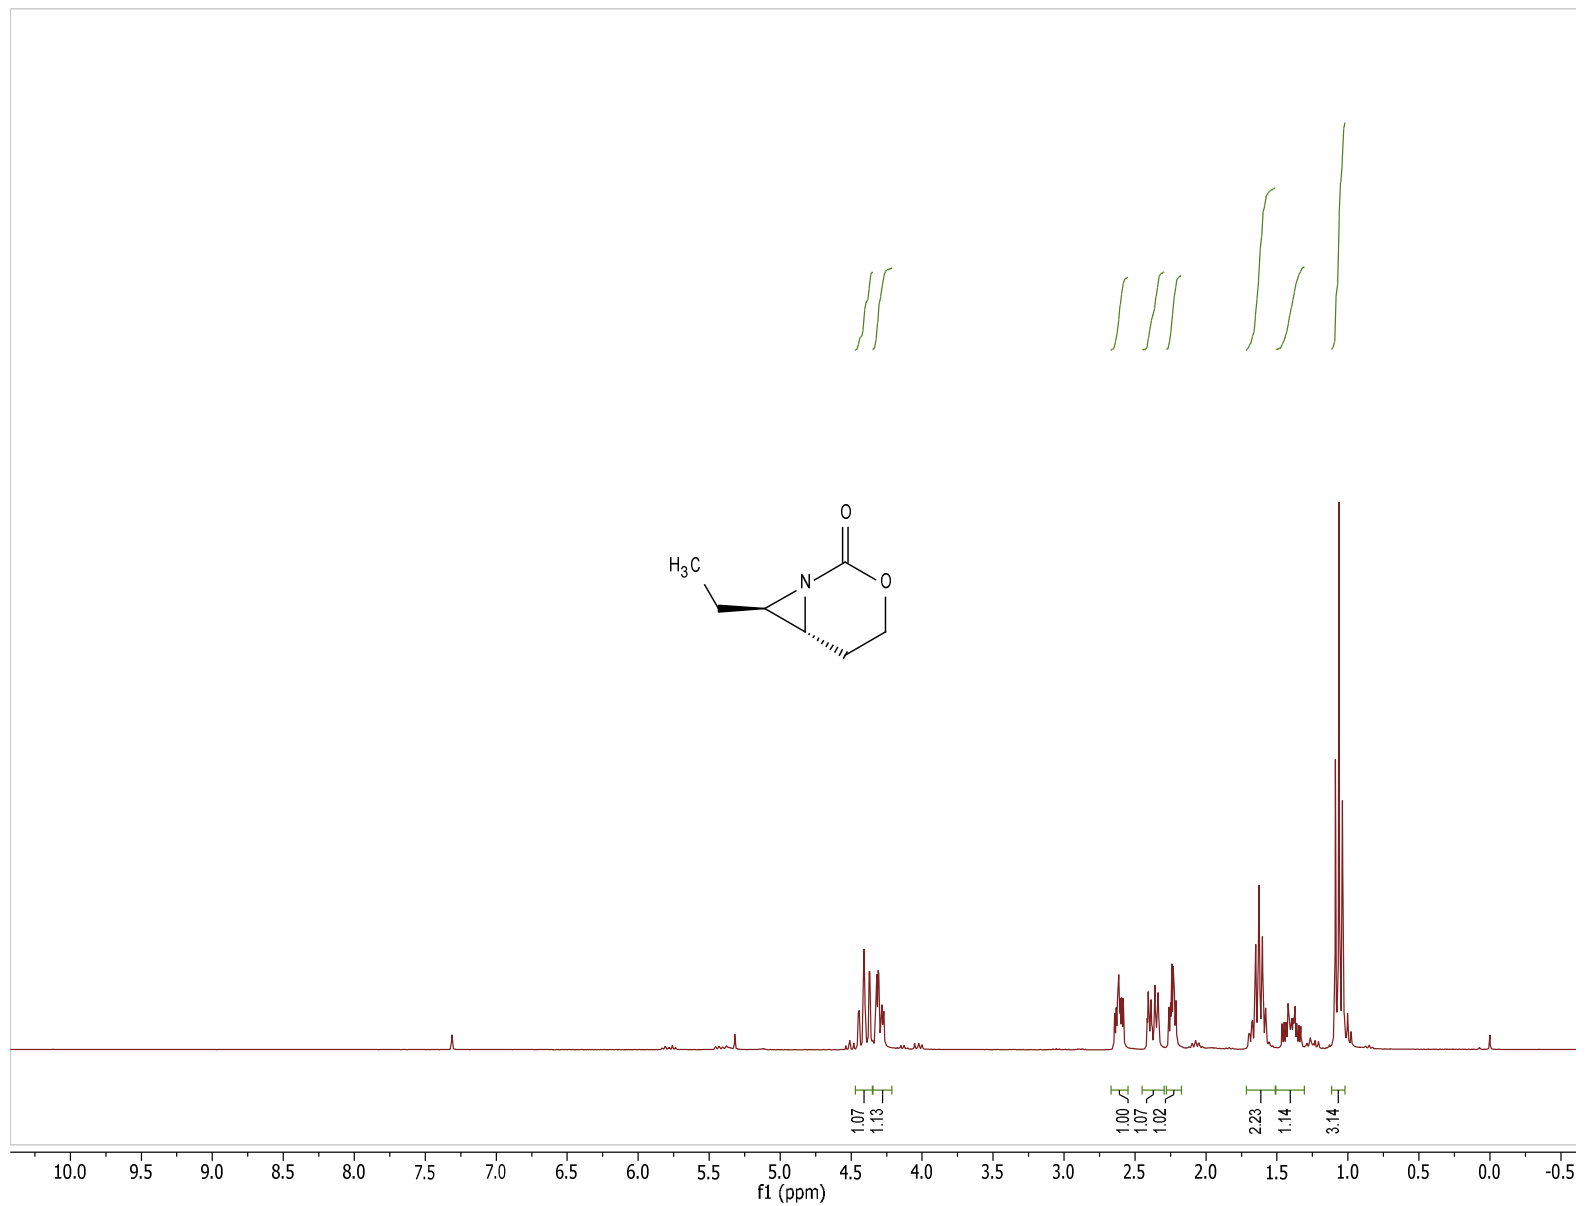

Compound 7d.

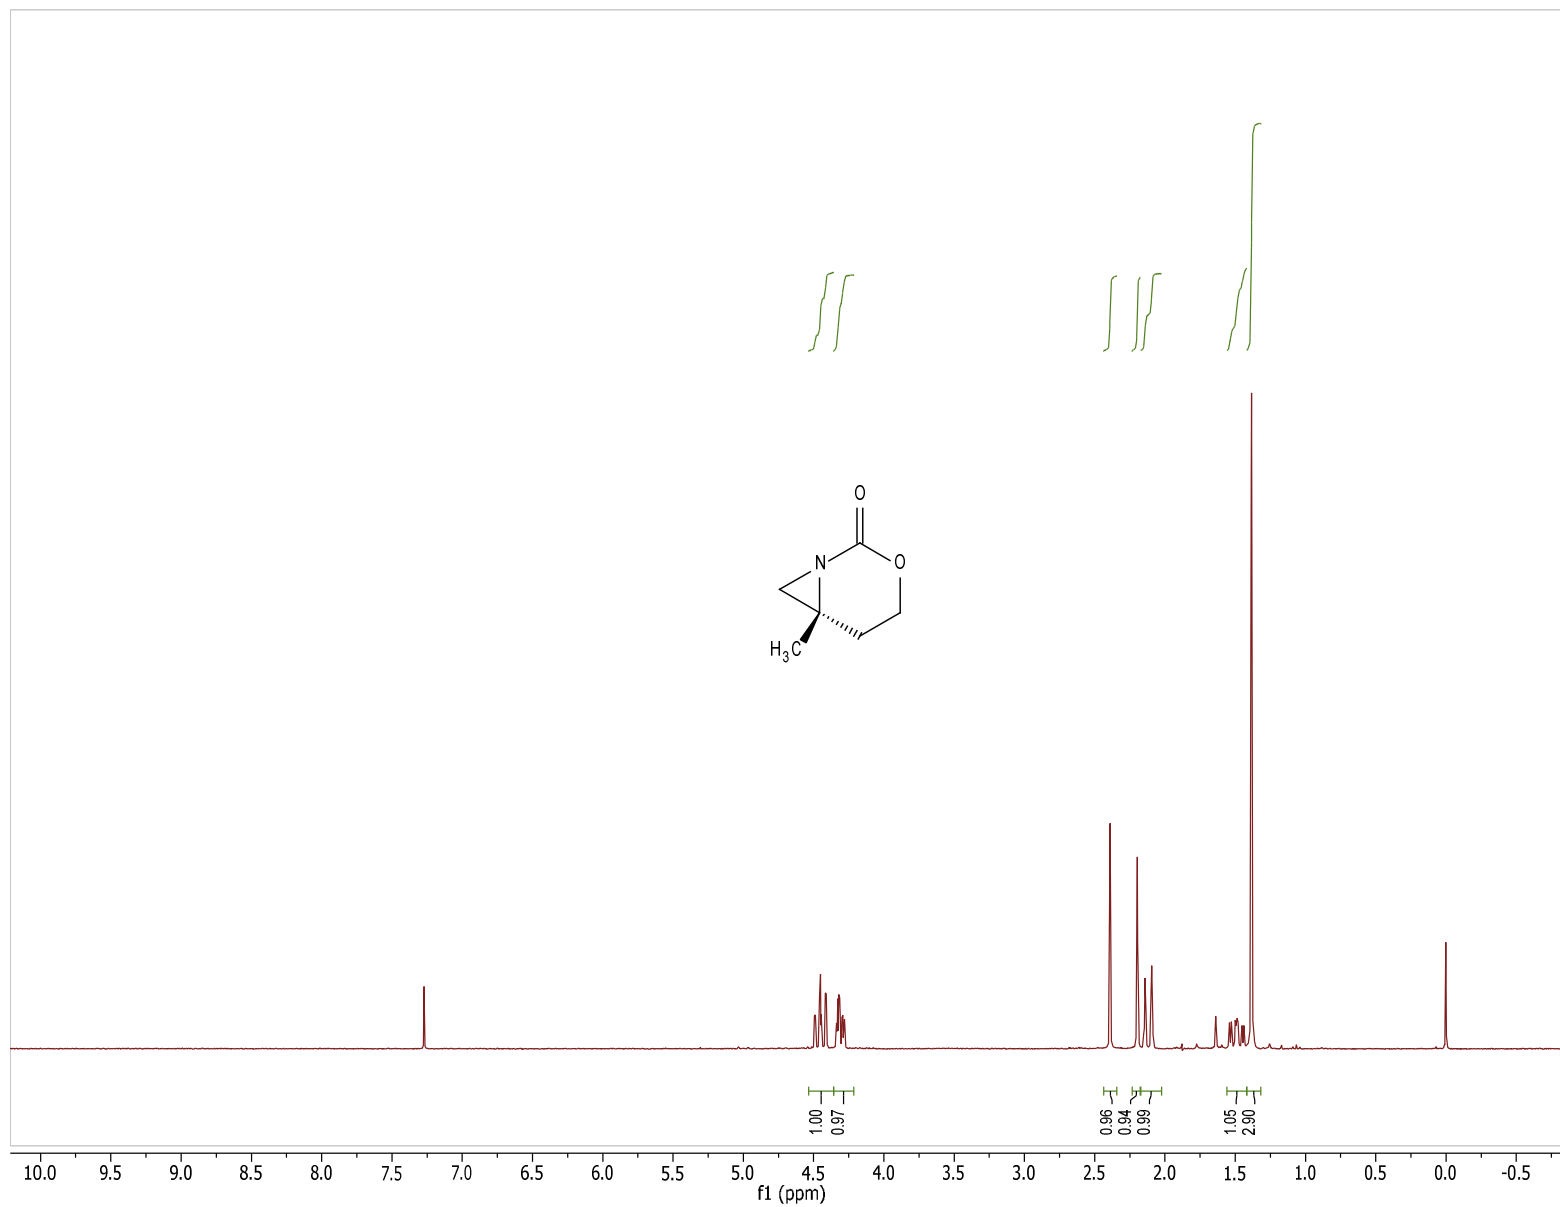

Compound 7e.

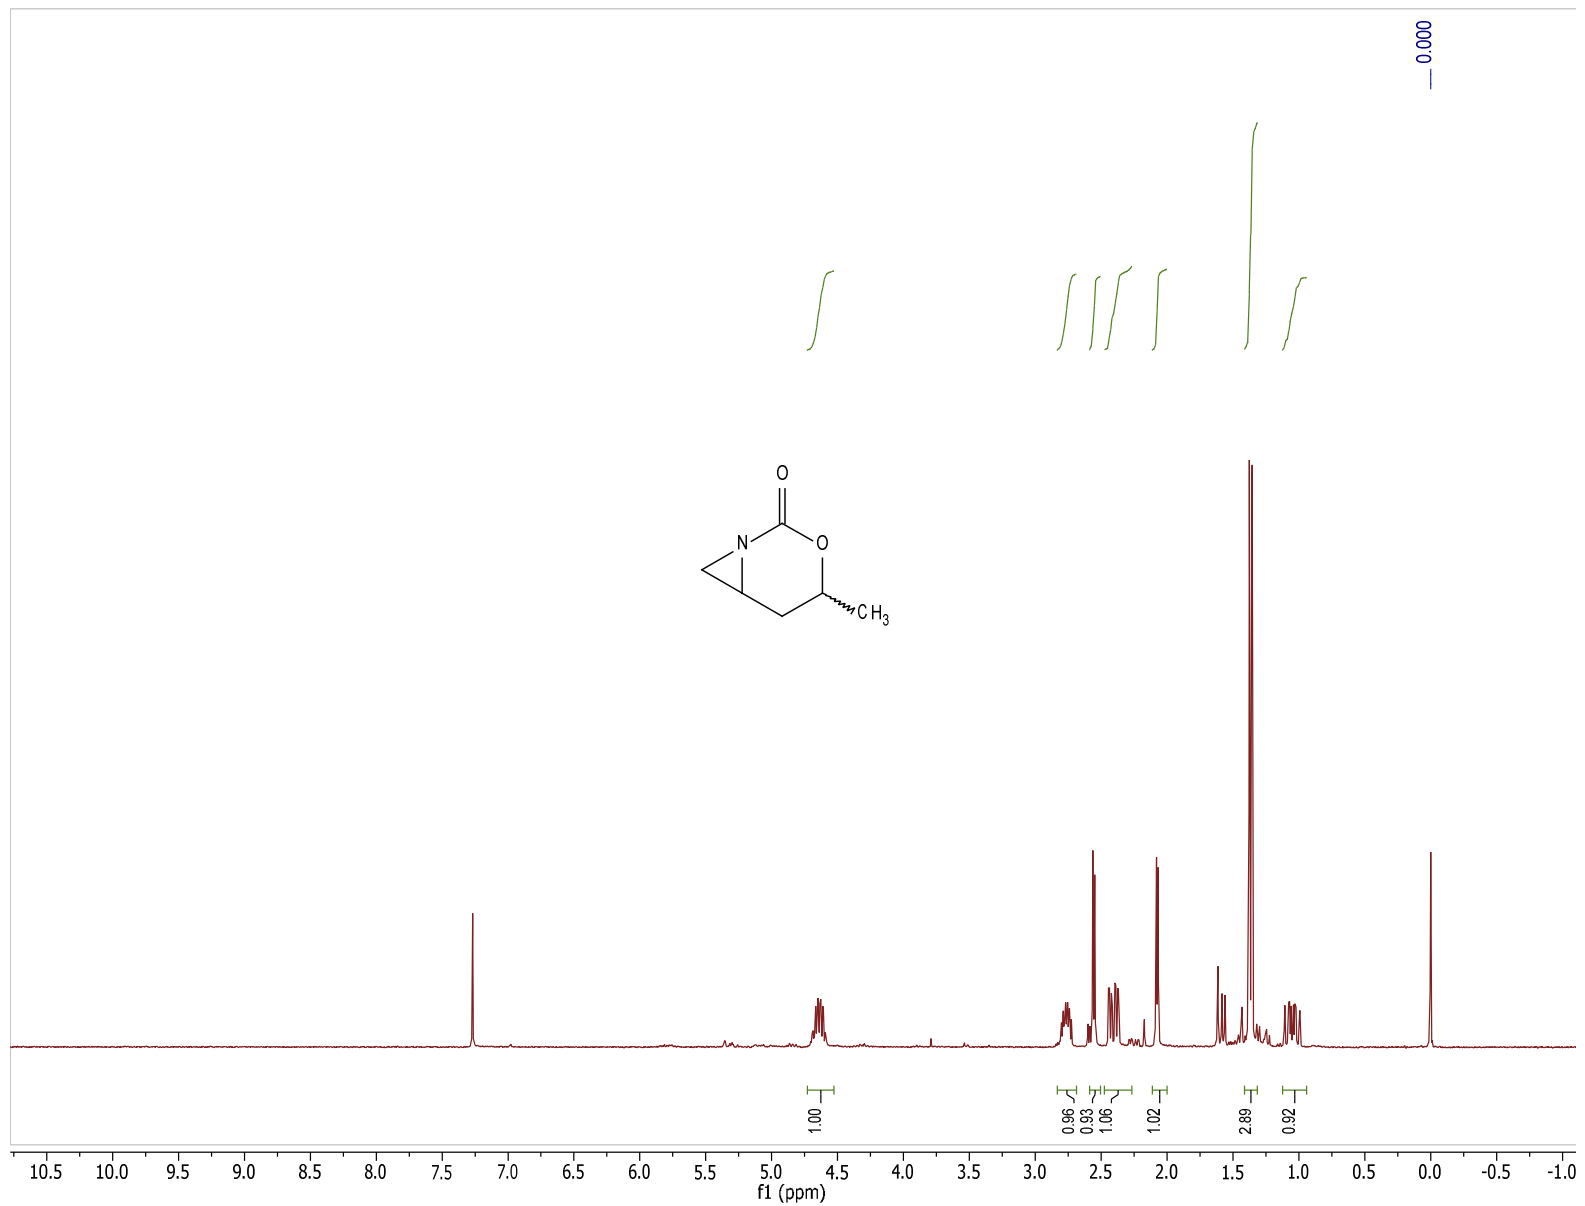

Compound 7e.

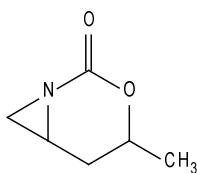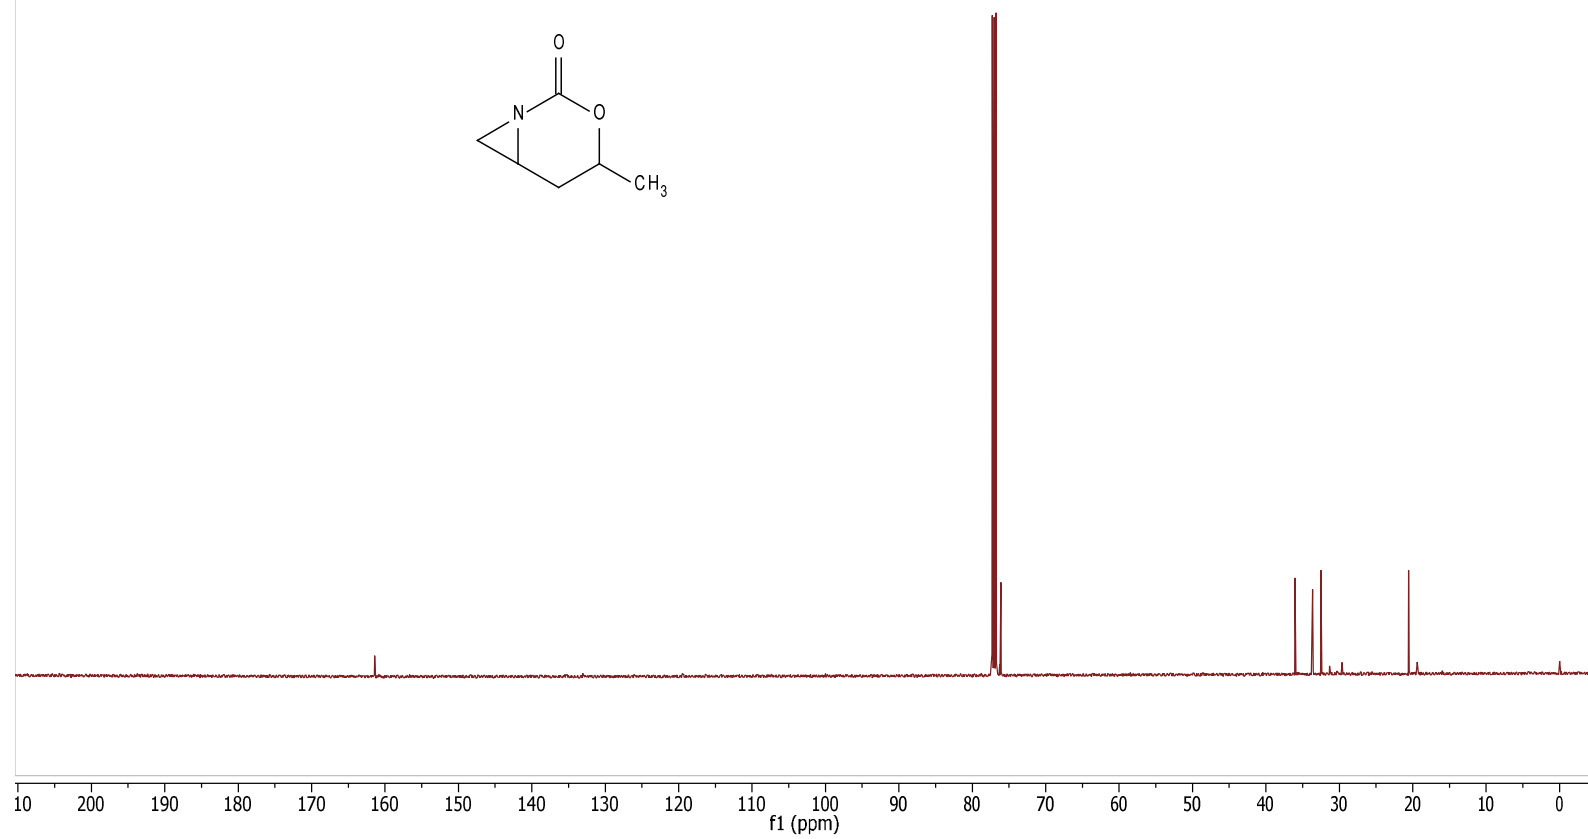



Compound 8a.

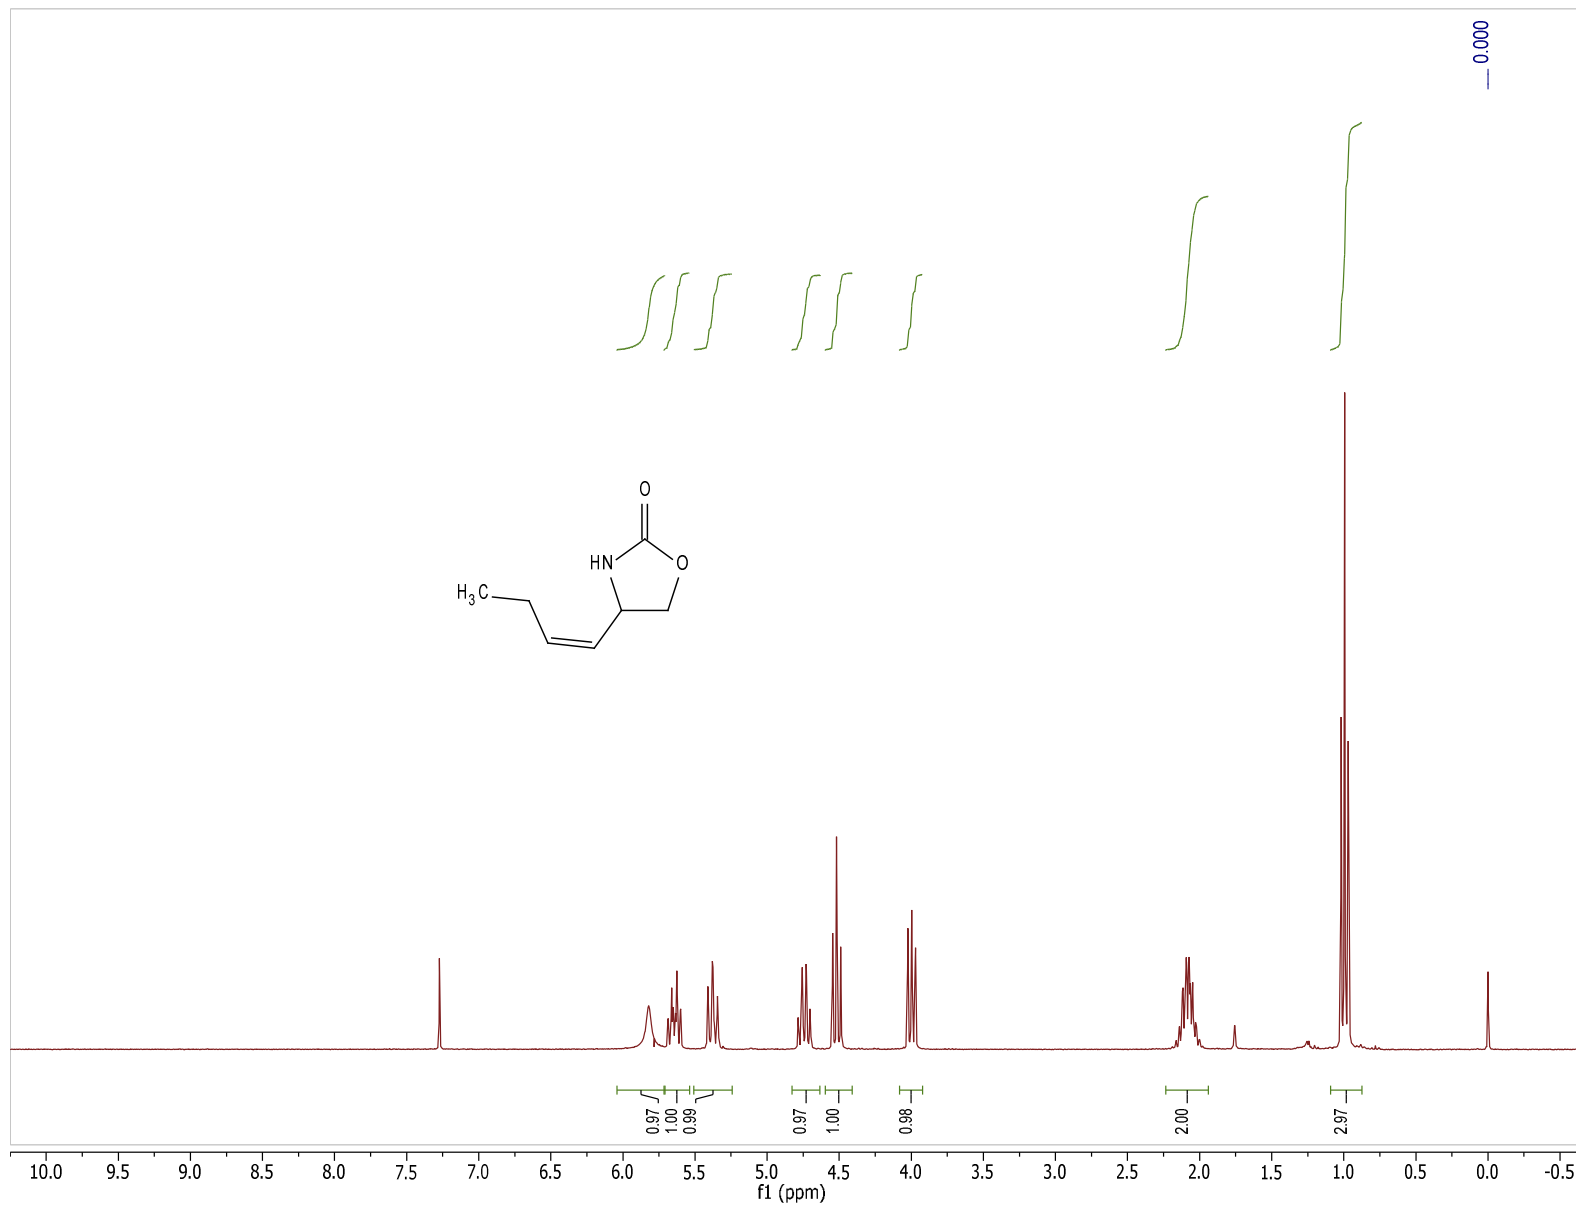

Compound 8b.

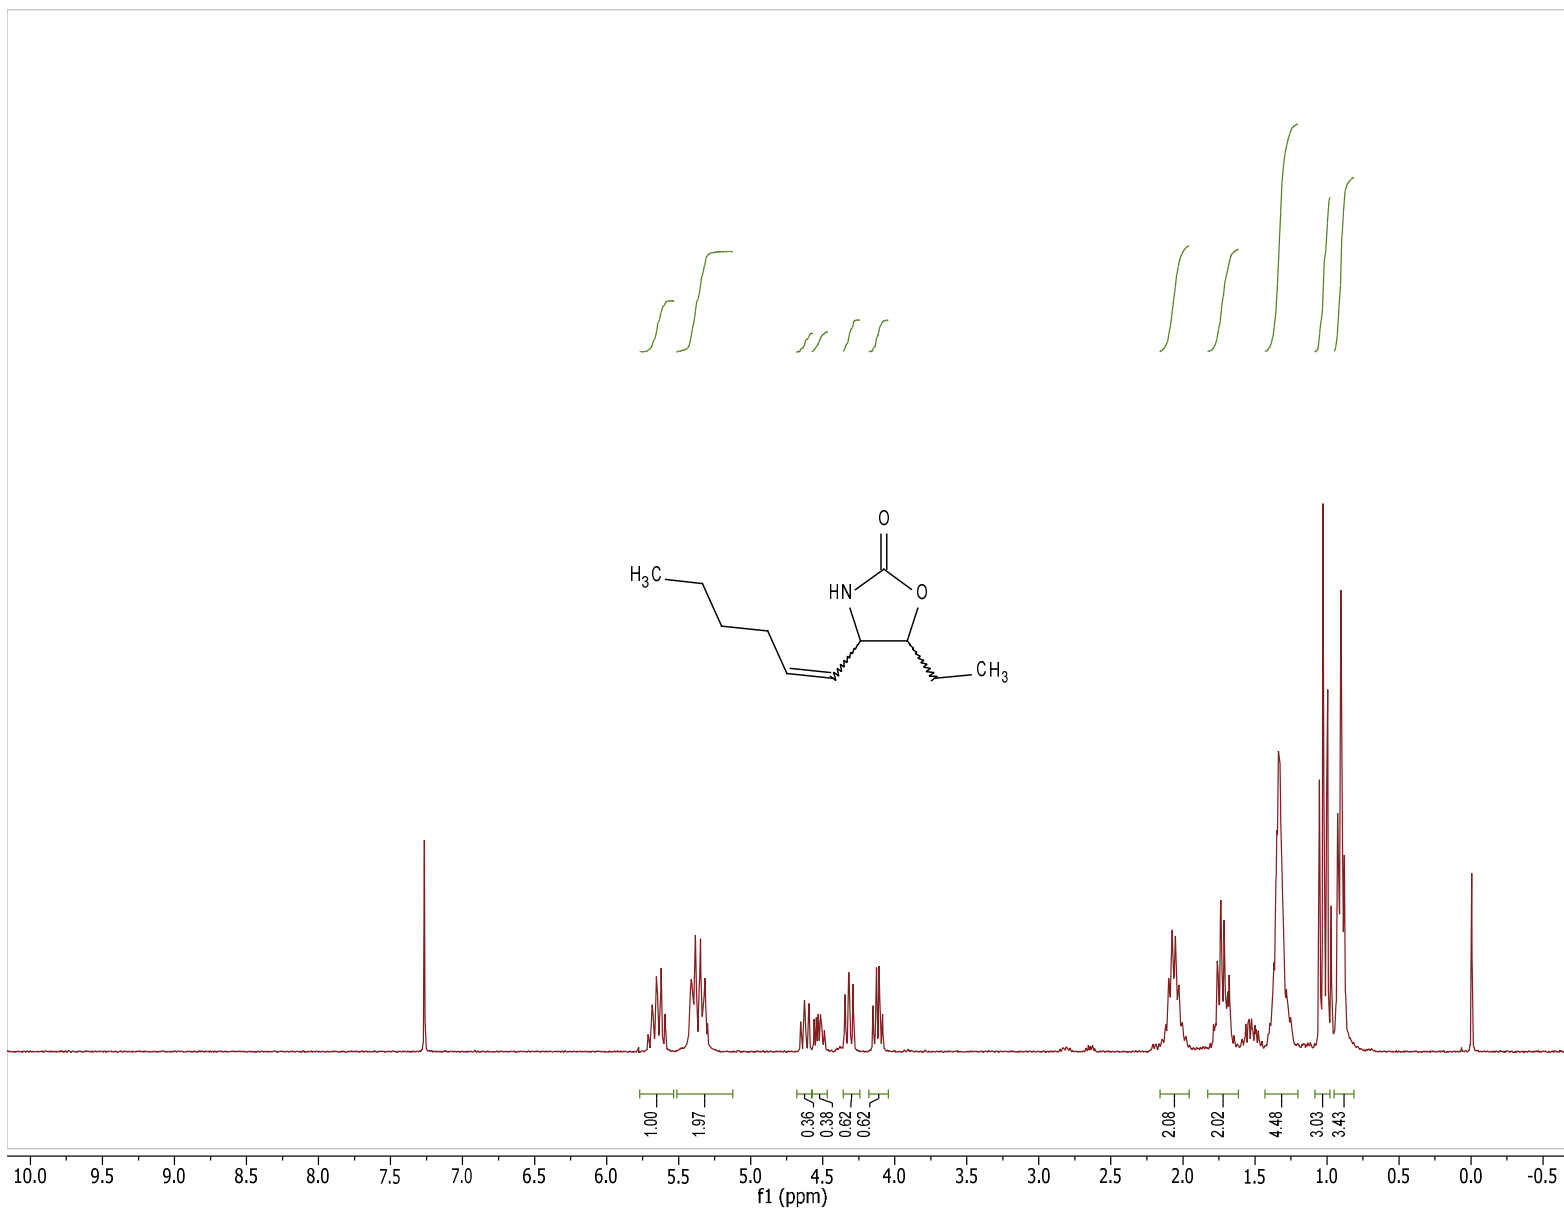

Compound 8b.

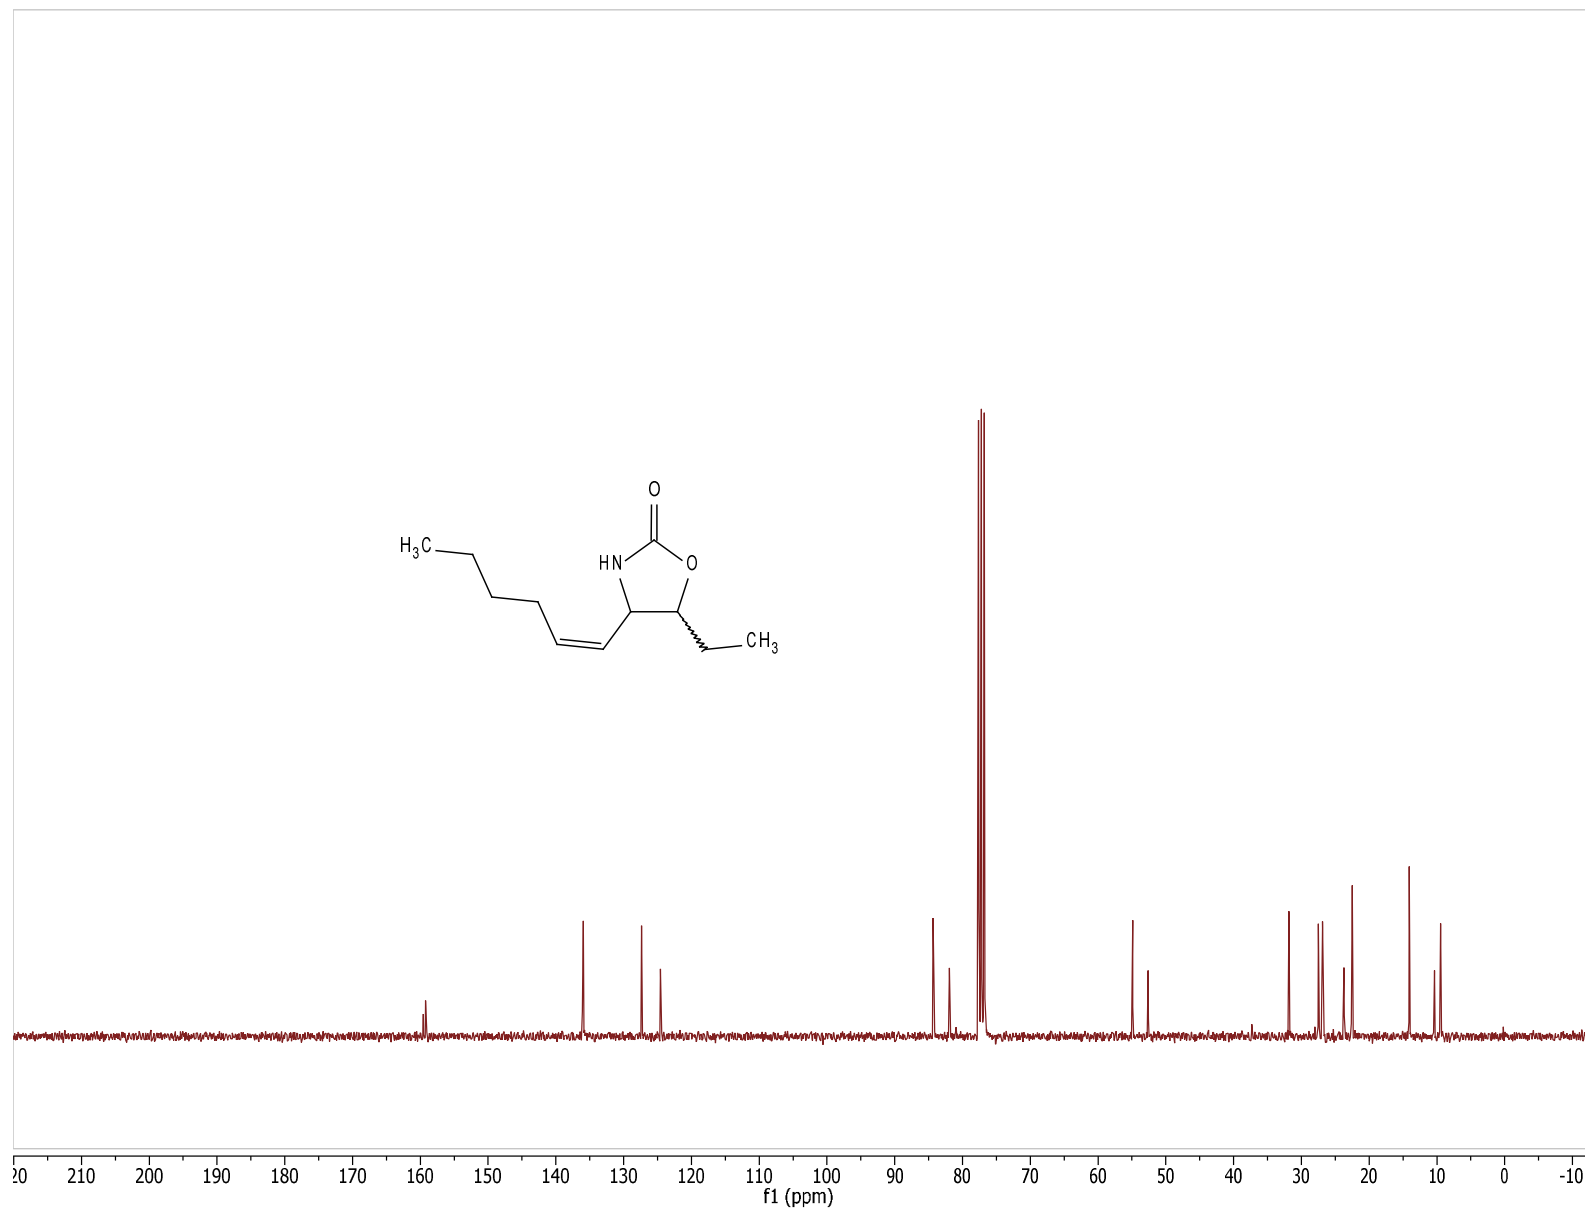

Compound 8c.

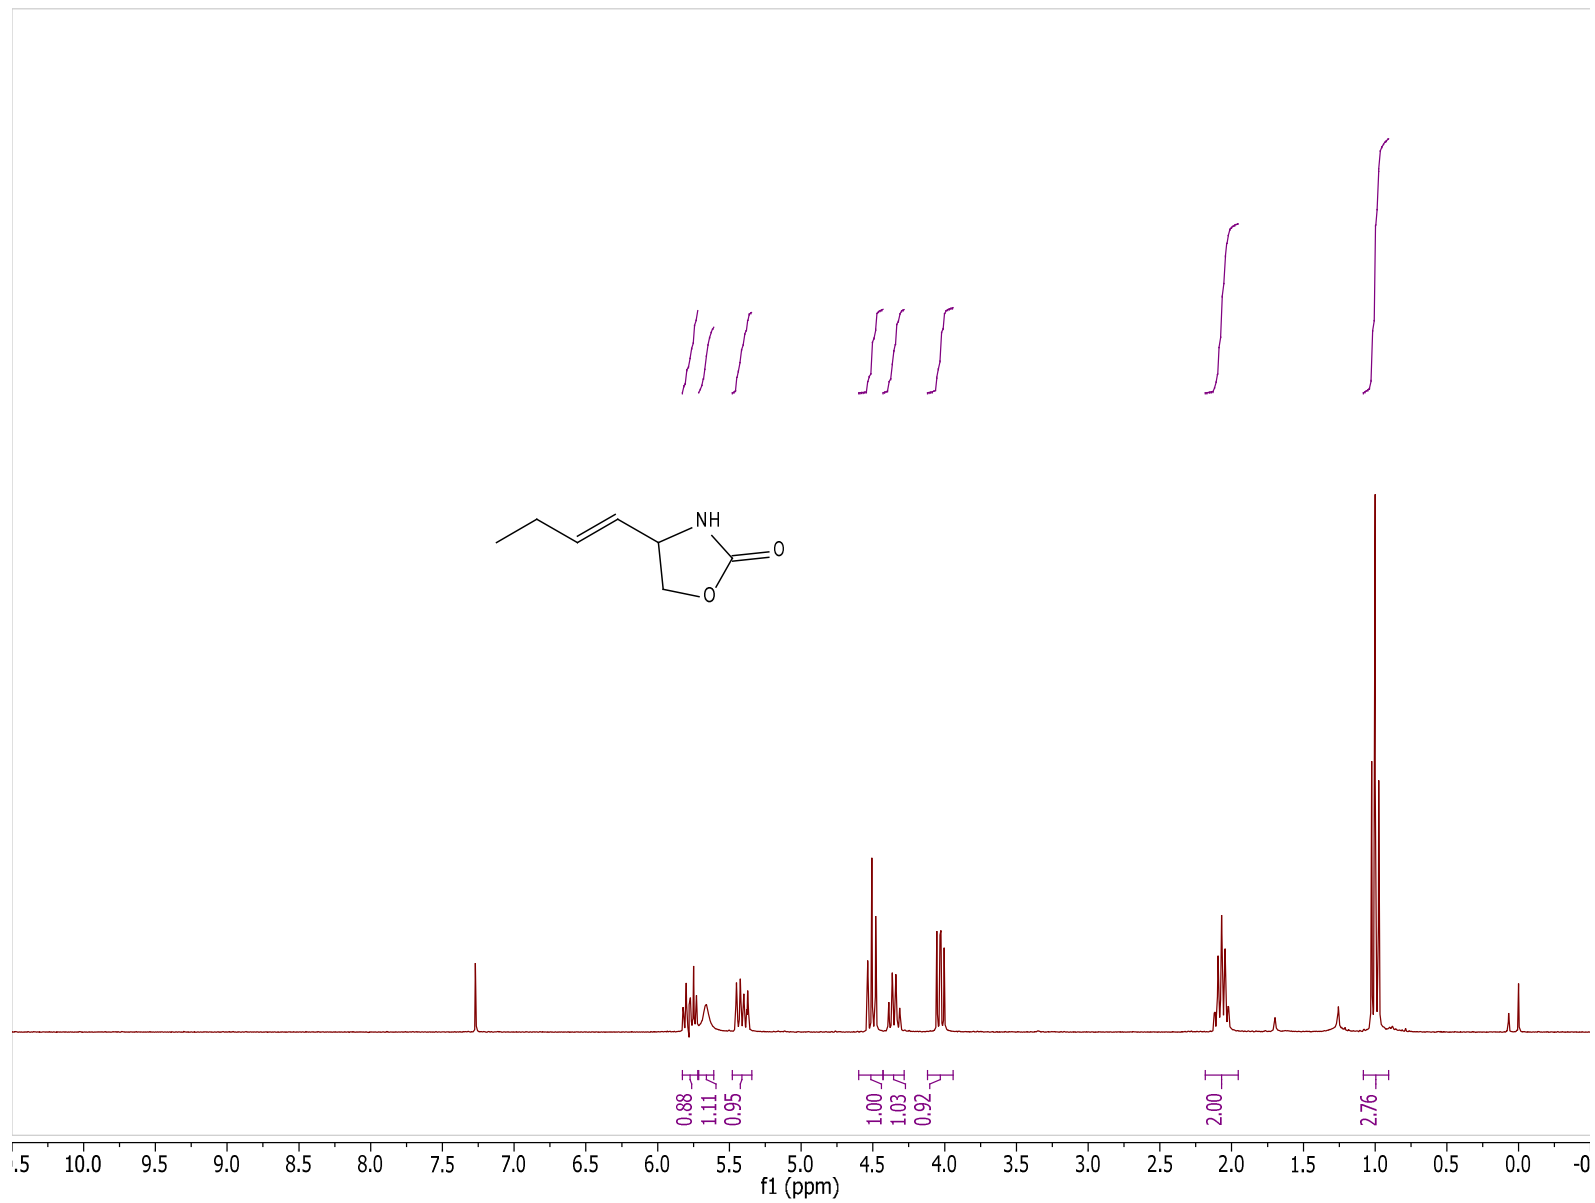

Compound 8d.

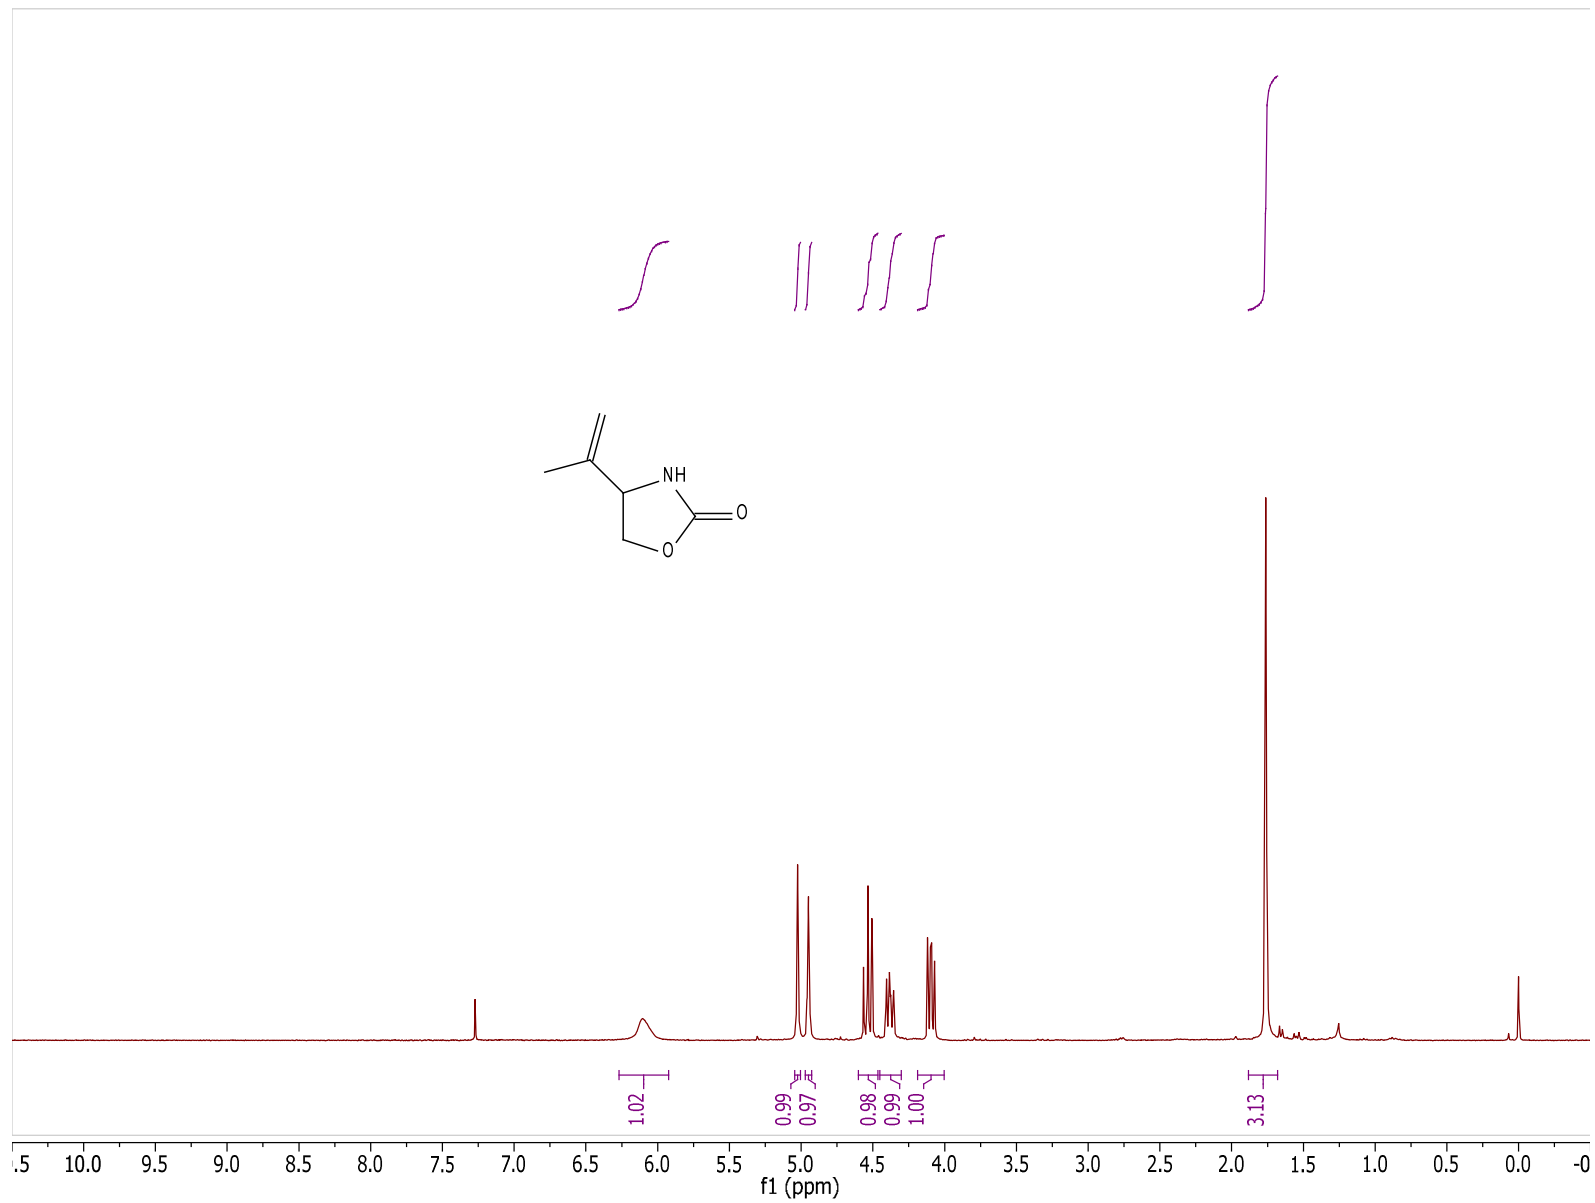

Compound 8e Major.

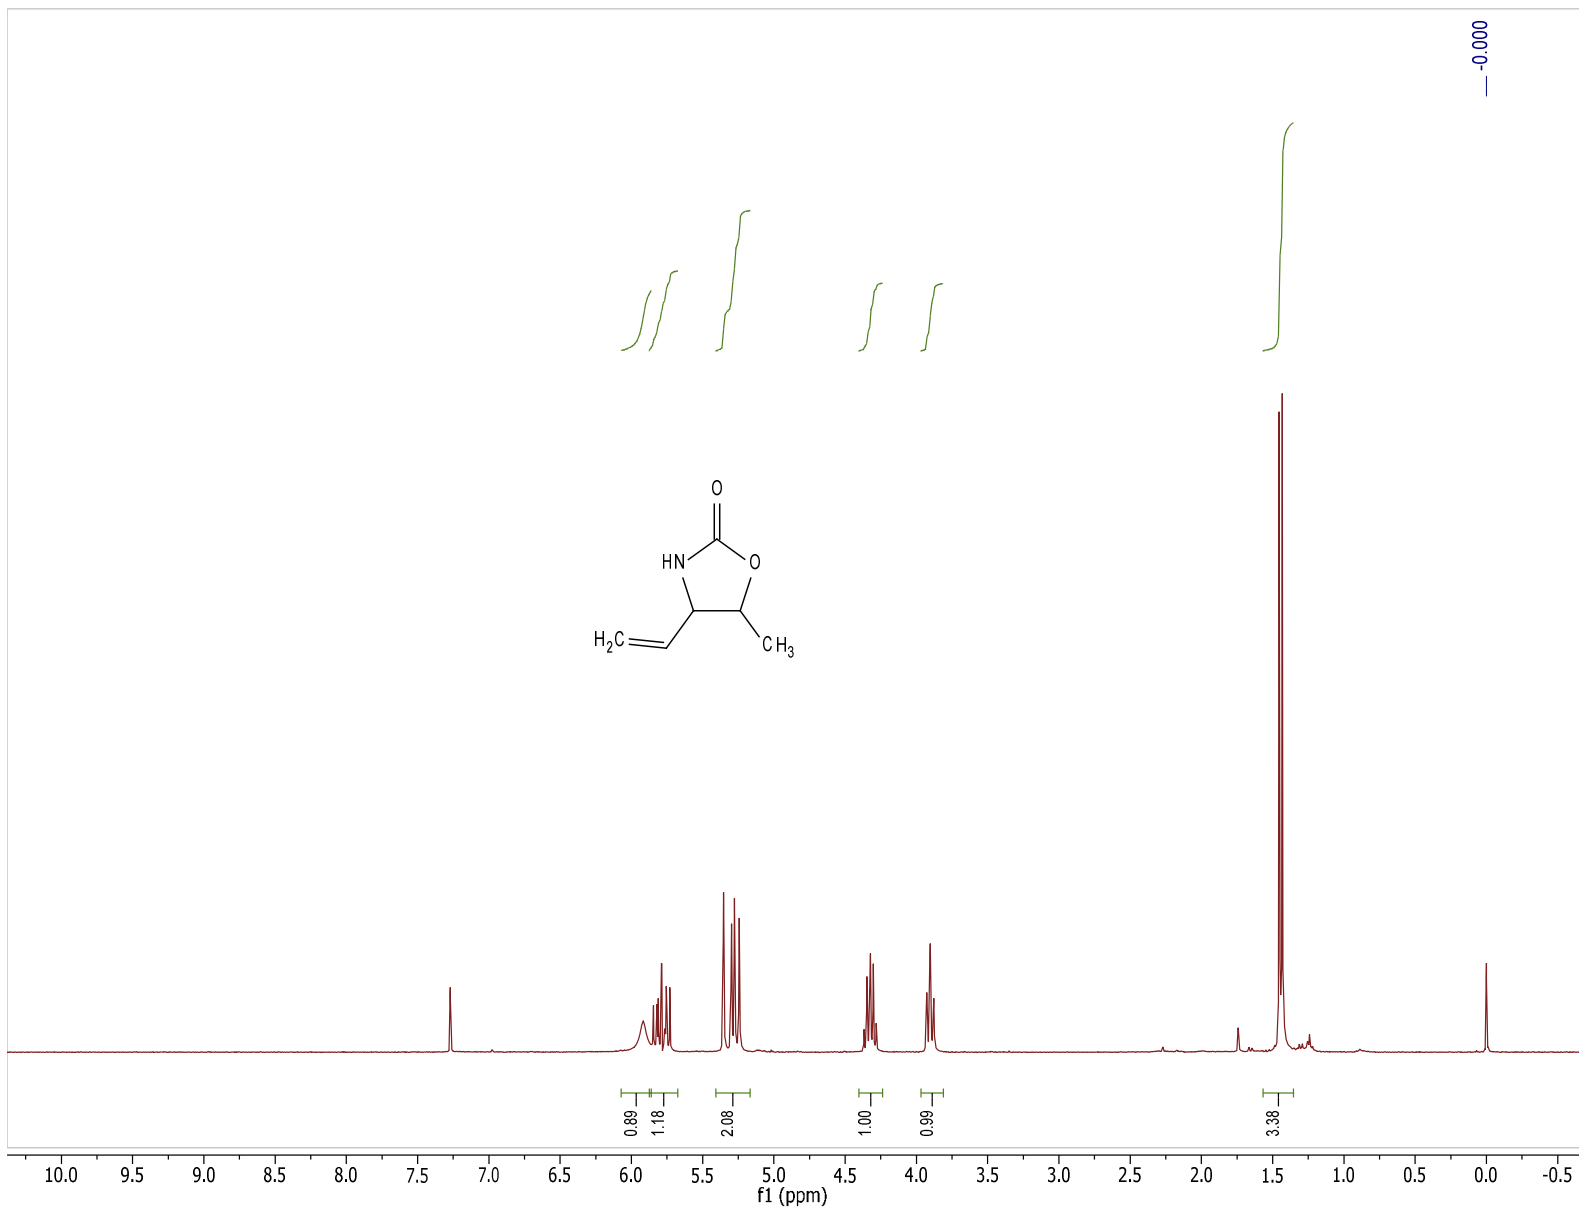

Compound 8e Major.

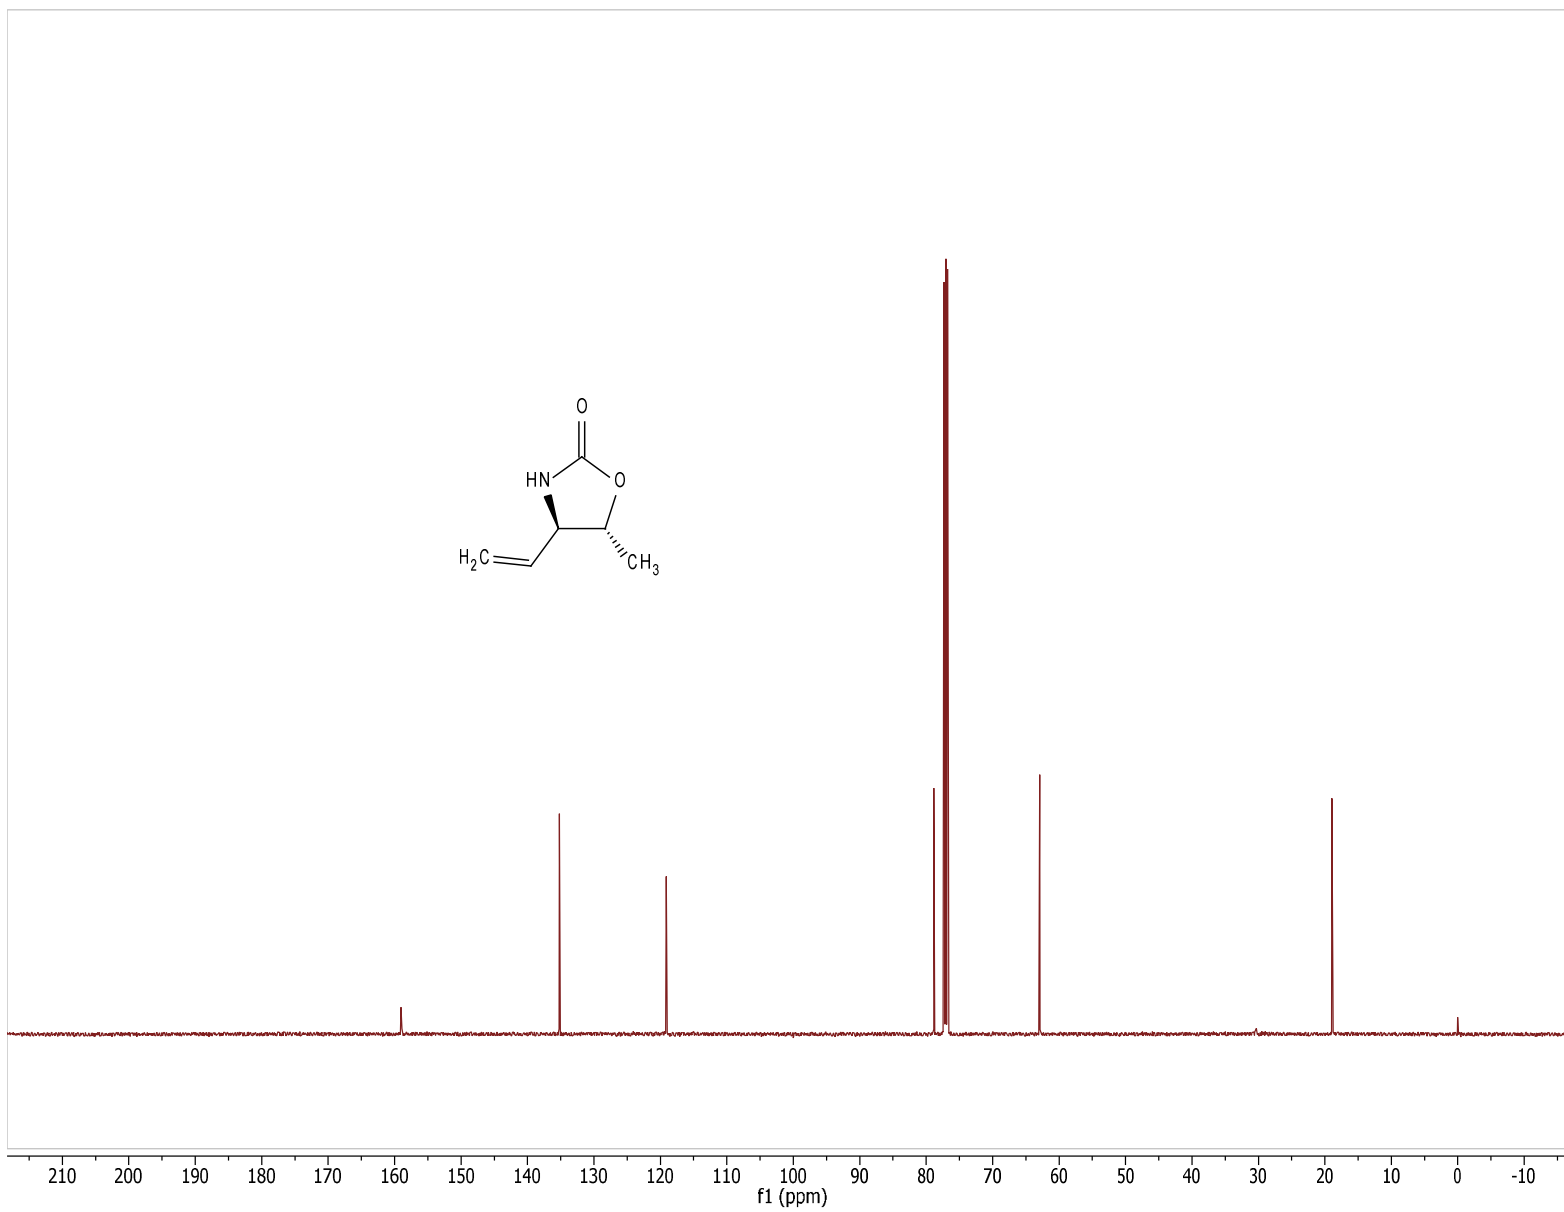

Compound 8e mixture of minor and major isomers.

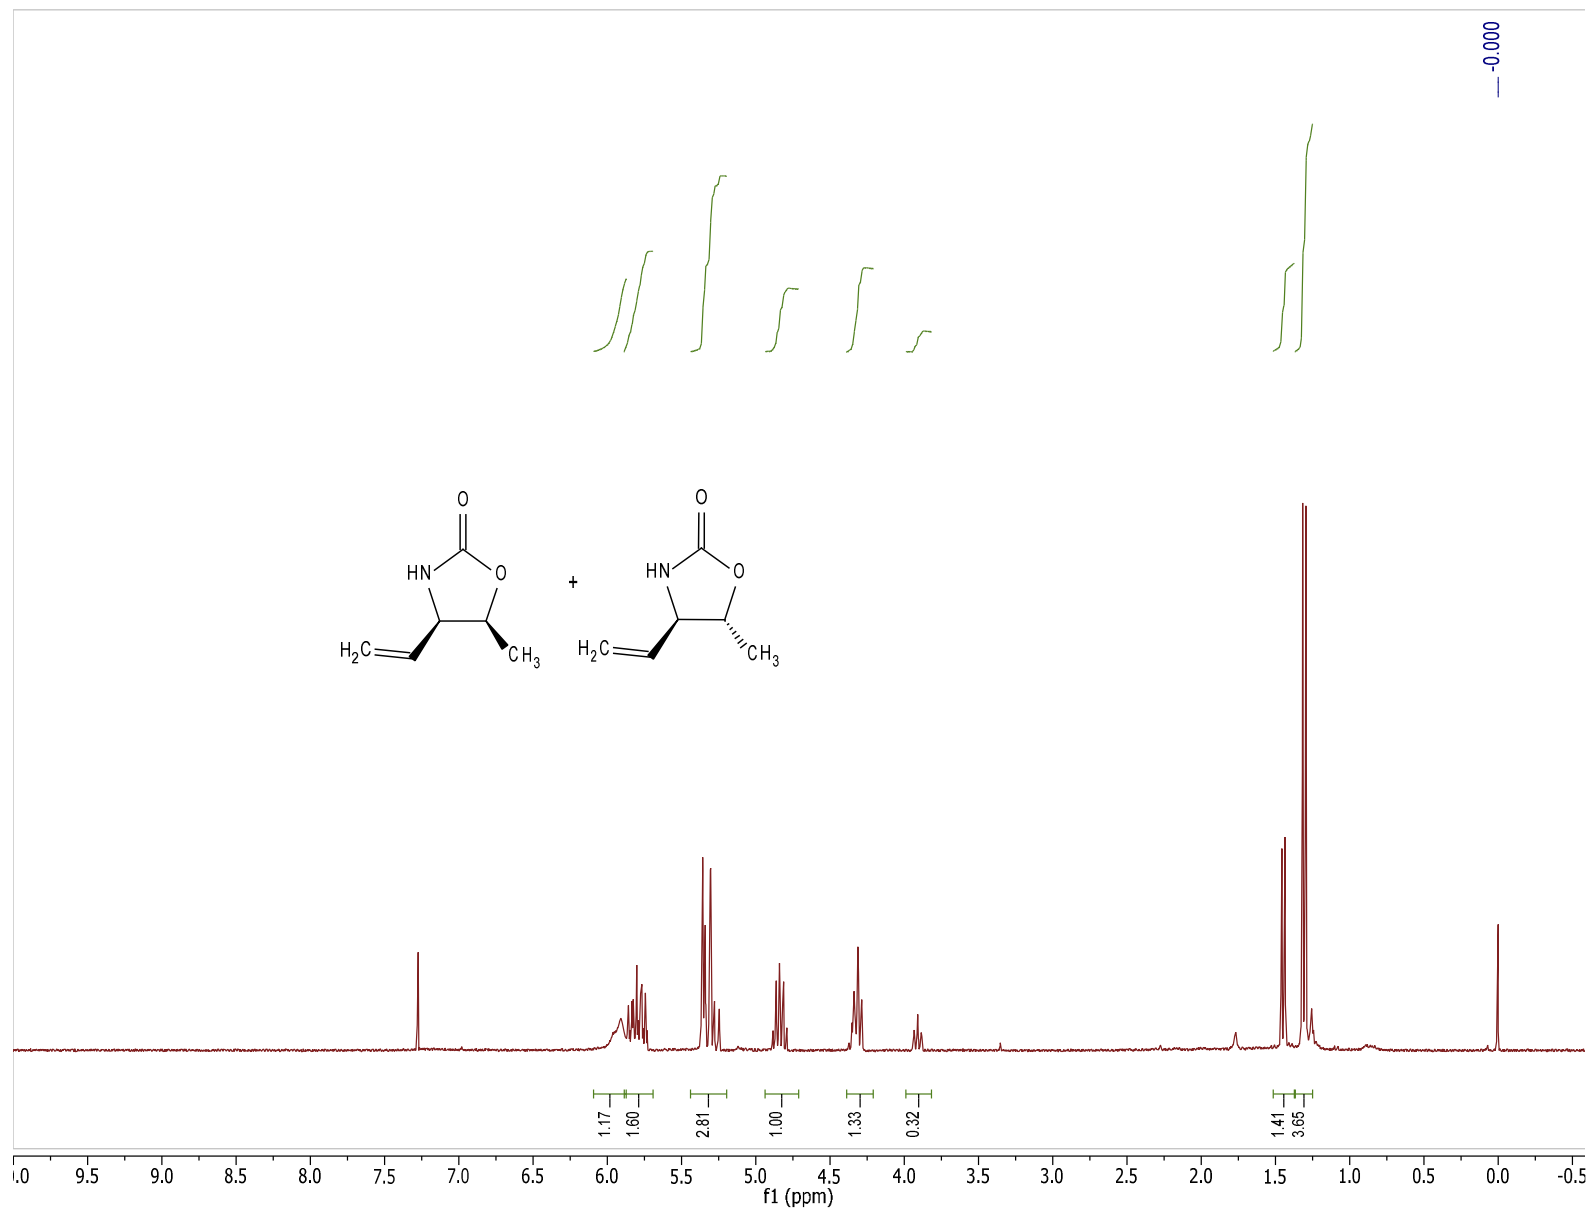



Compound 8e mixture of minor and major isomers.

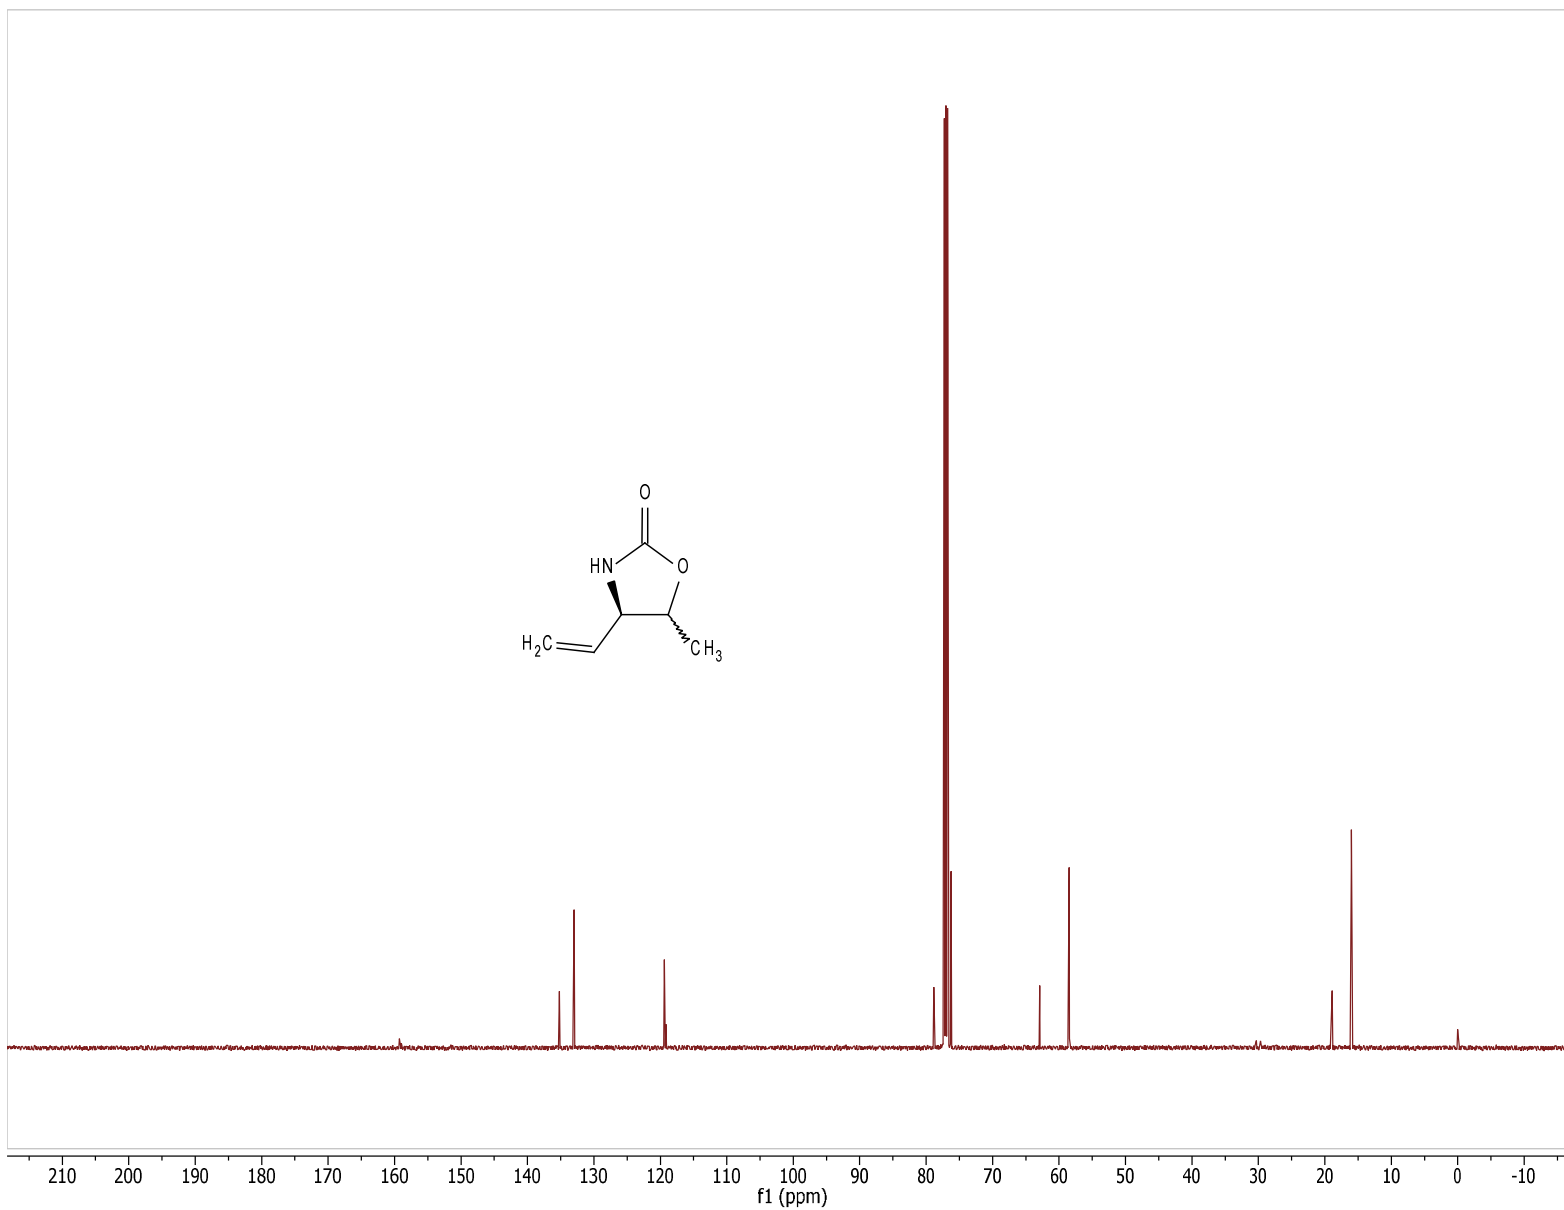

Compound 11.

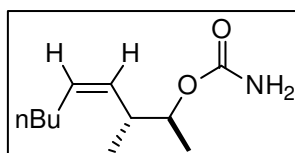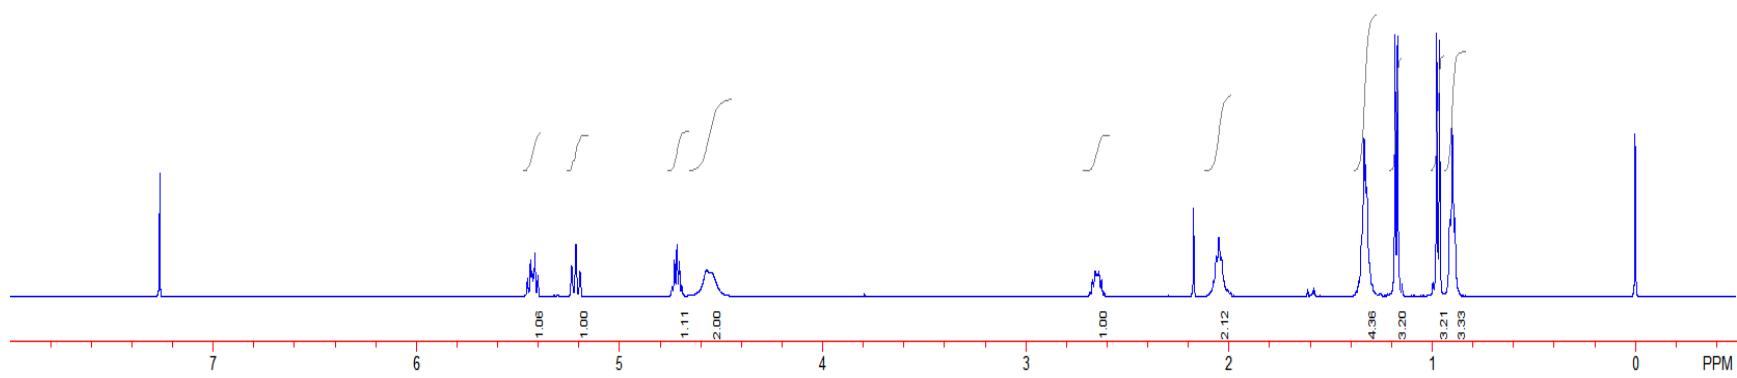

Compound 11.

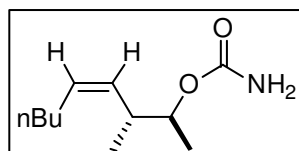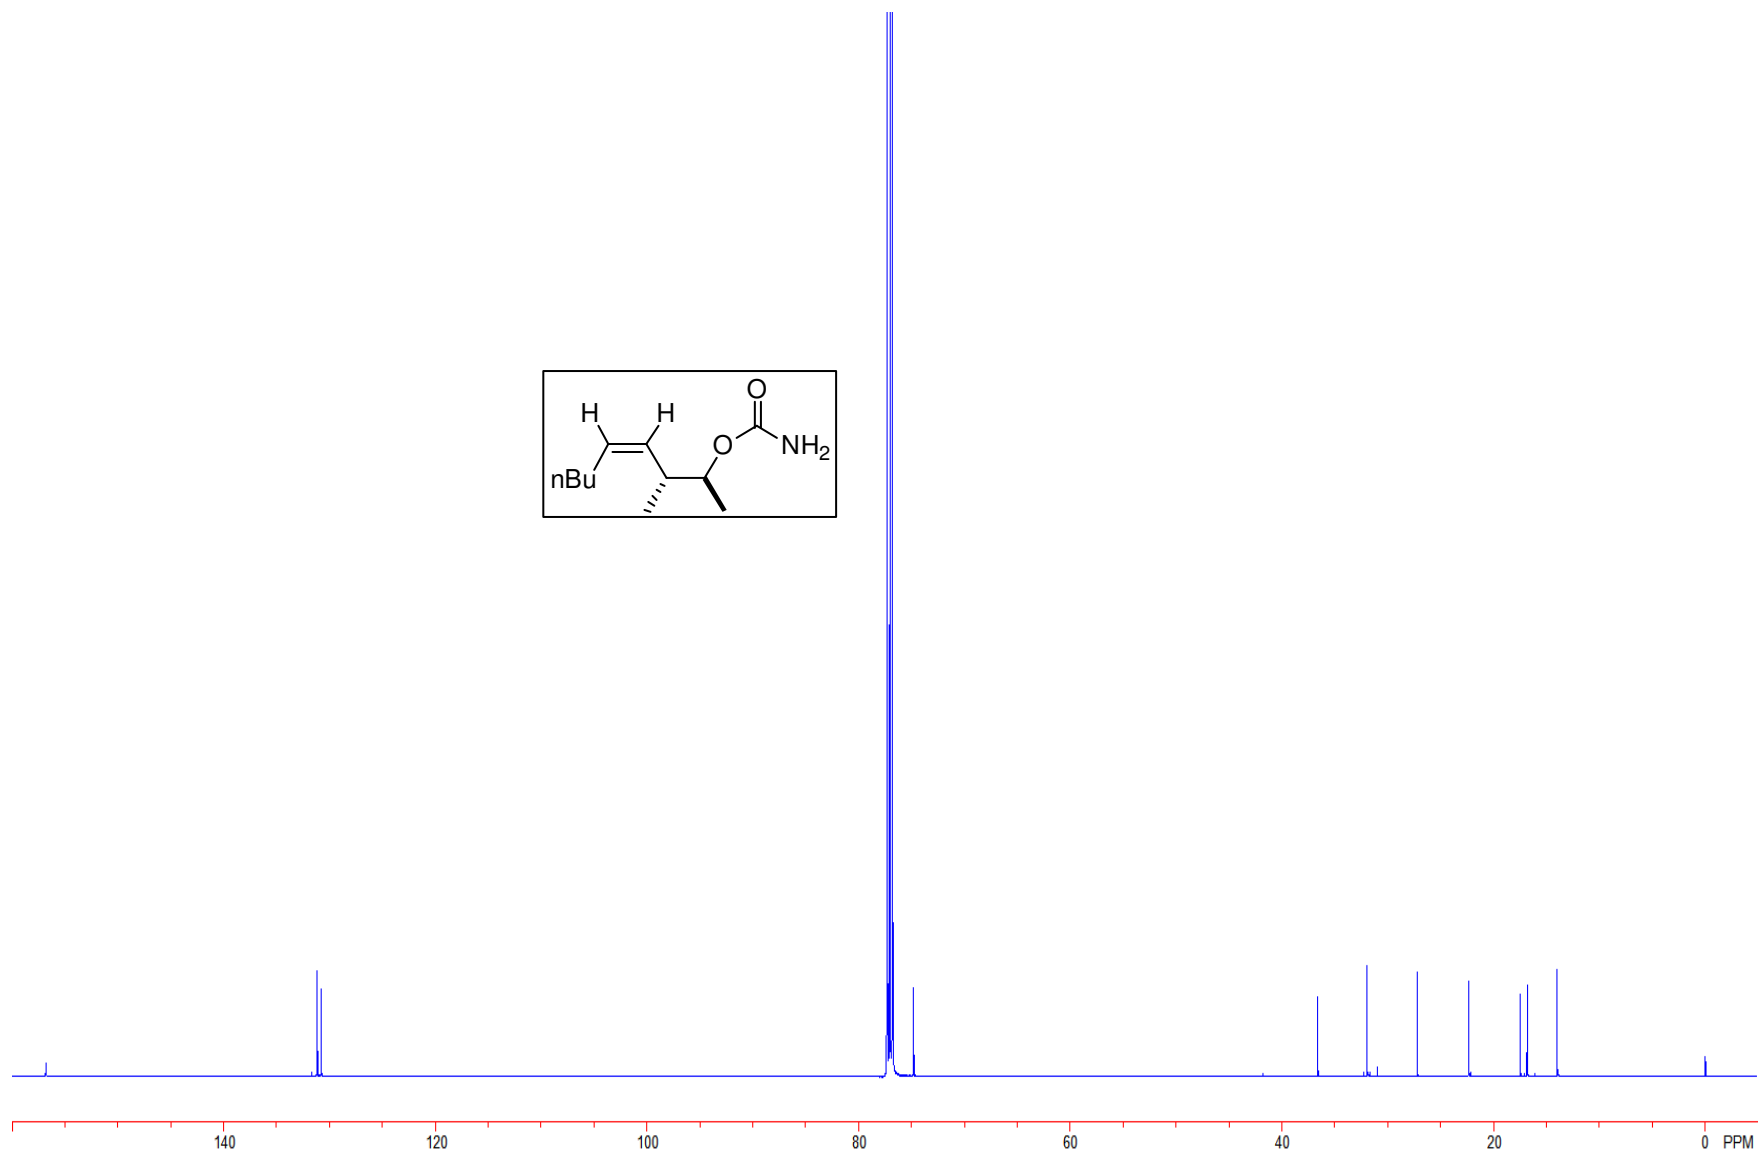

Compound 12.

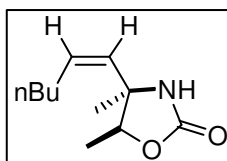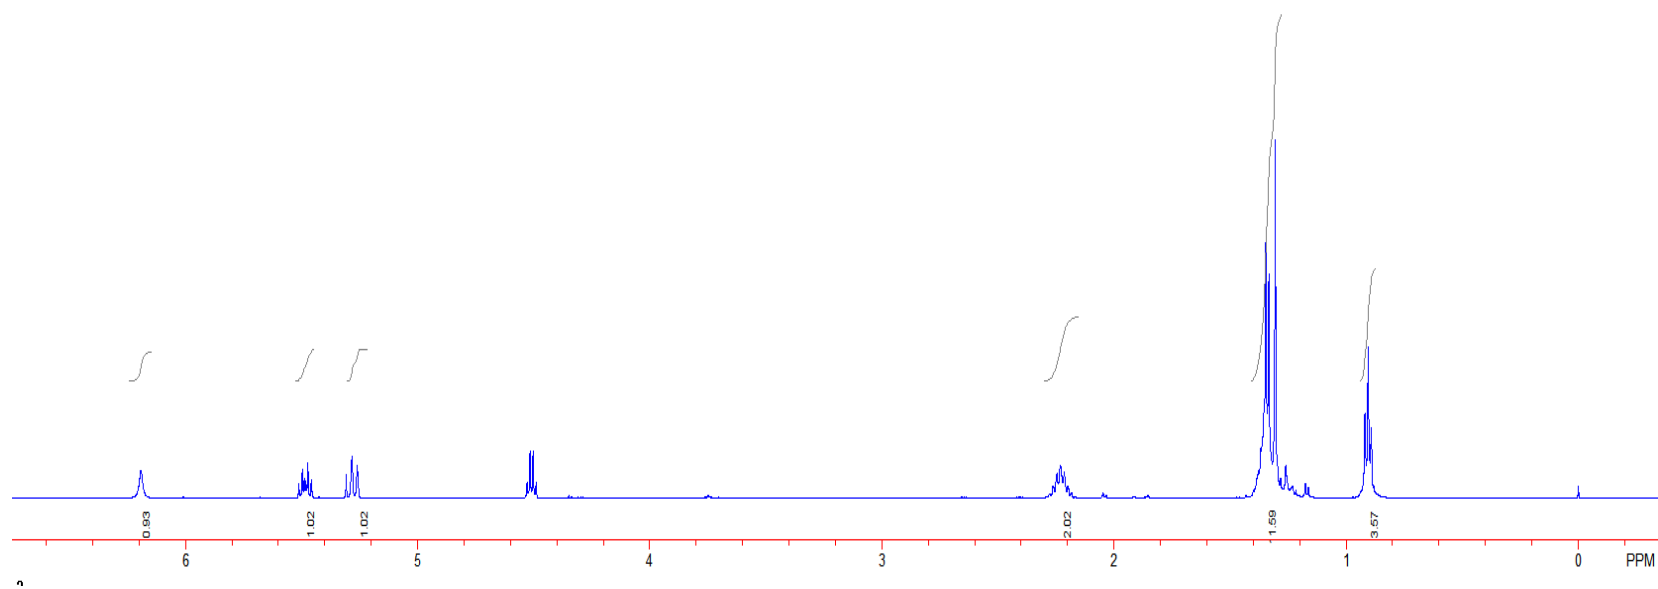



Compound 14-Da.

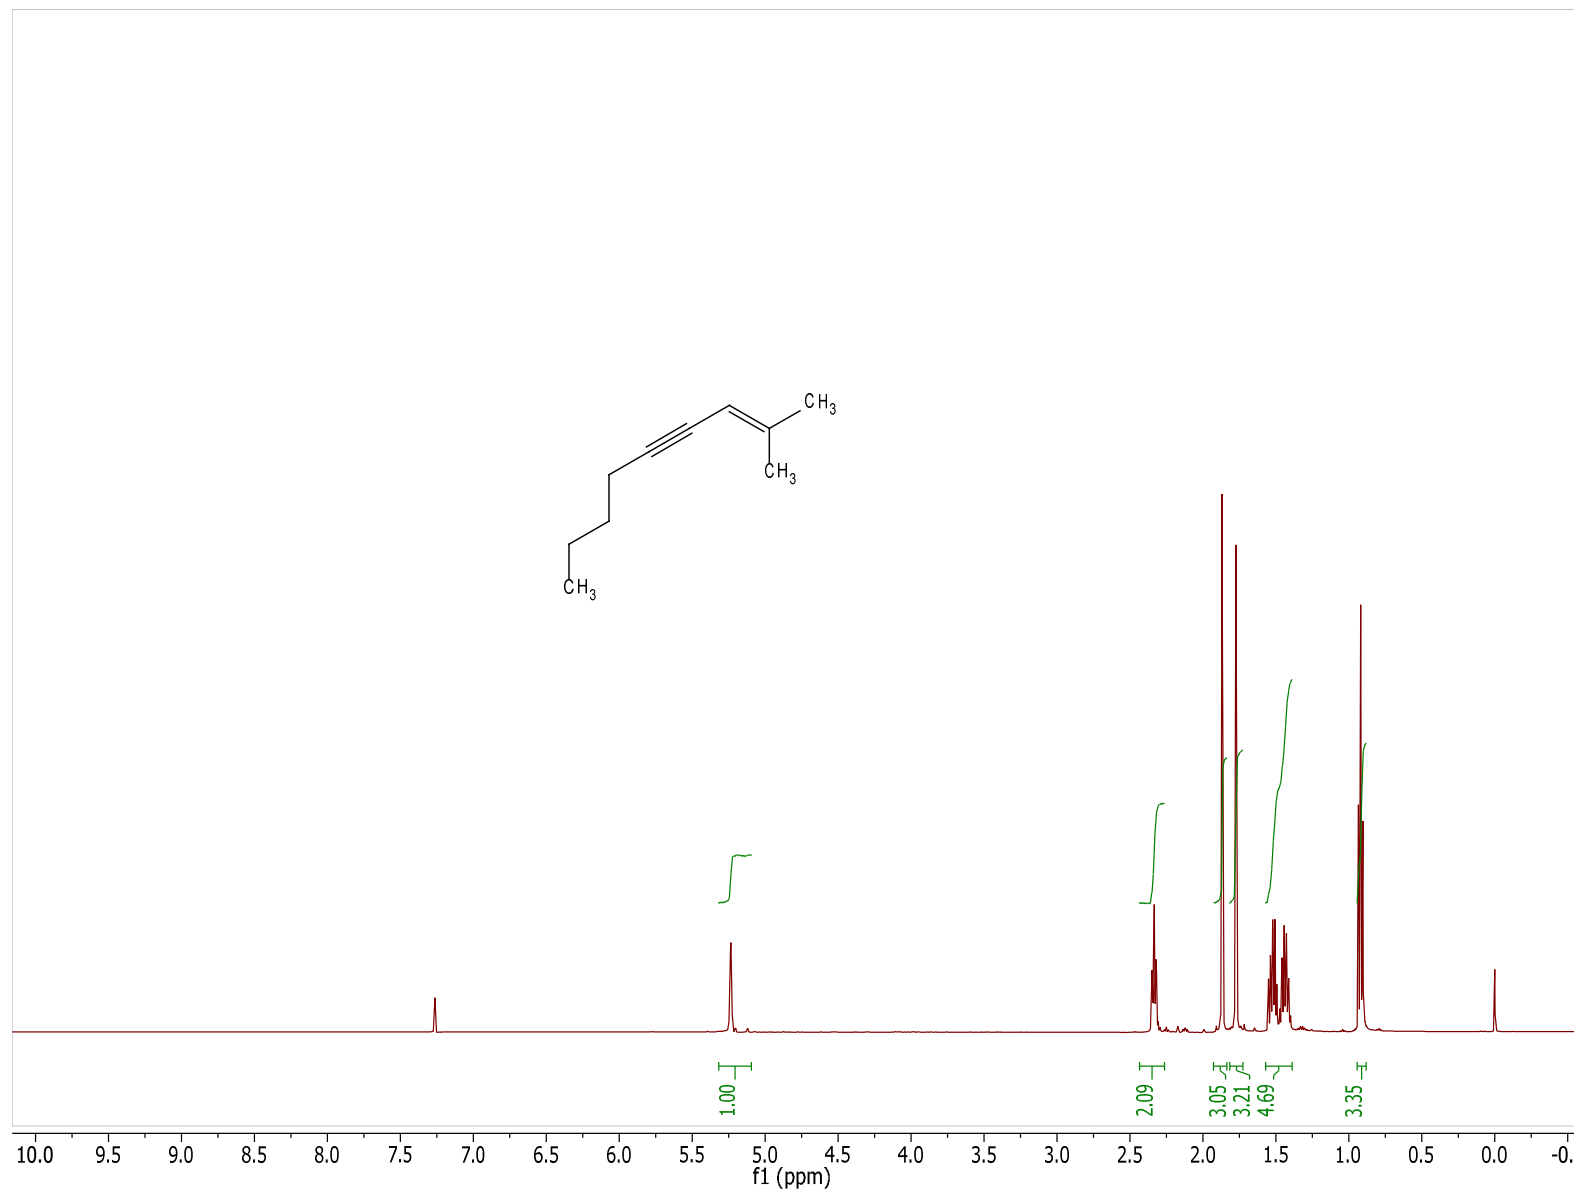

Compound 14-Da.

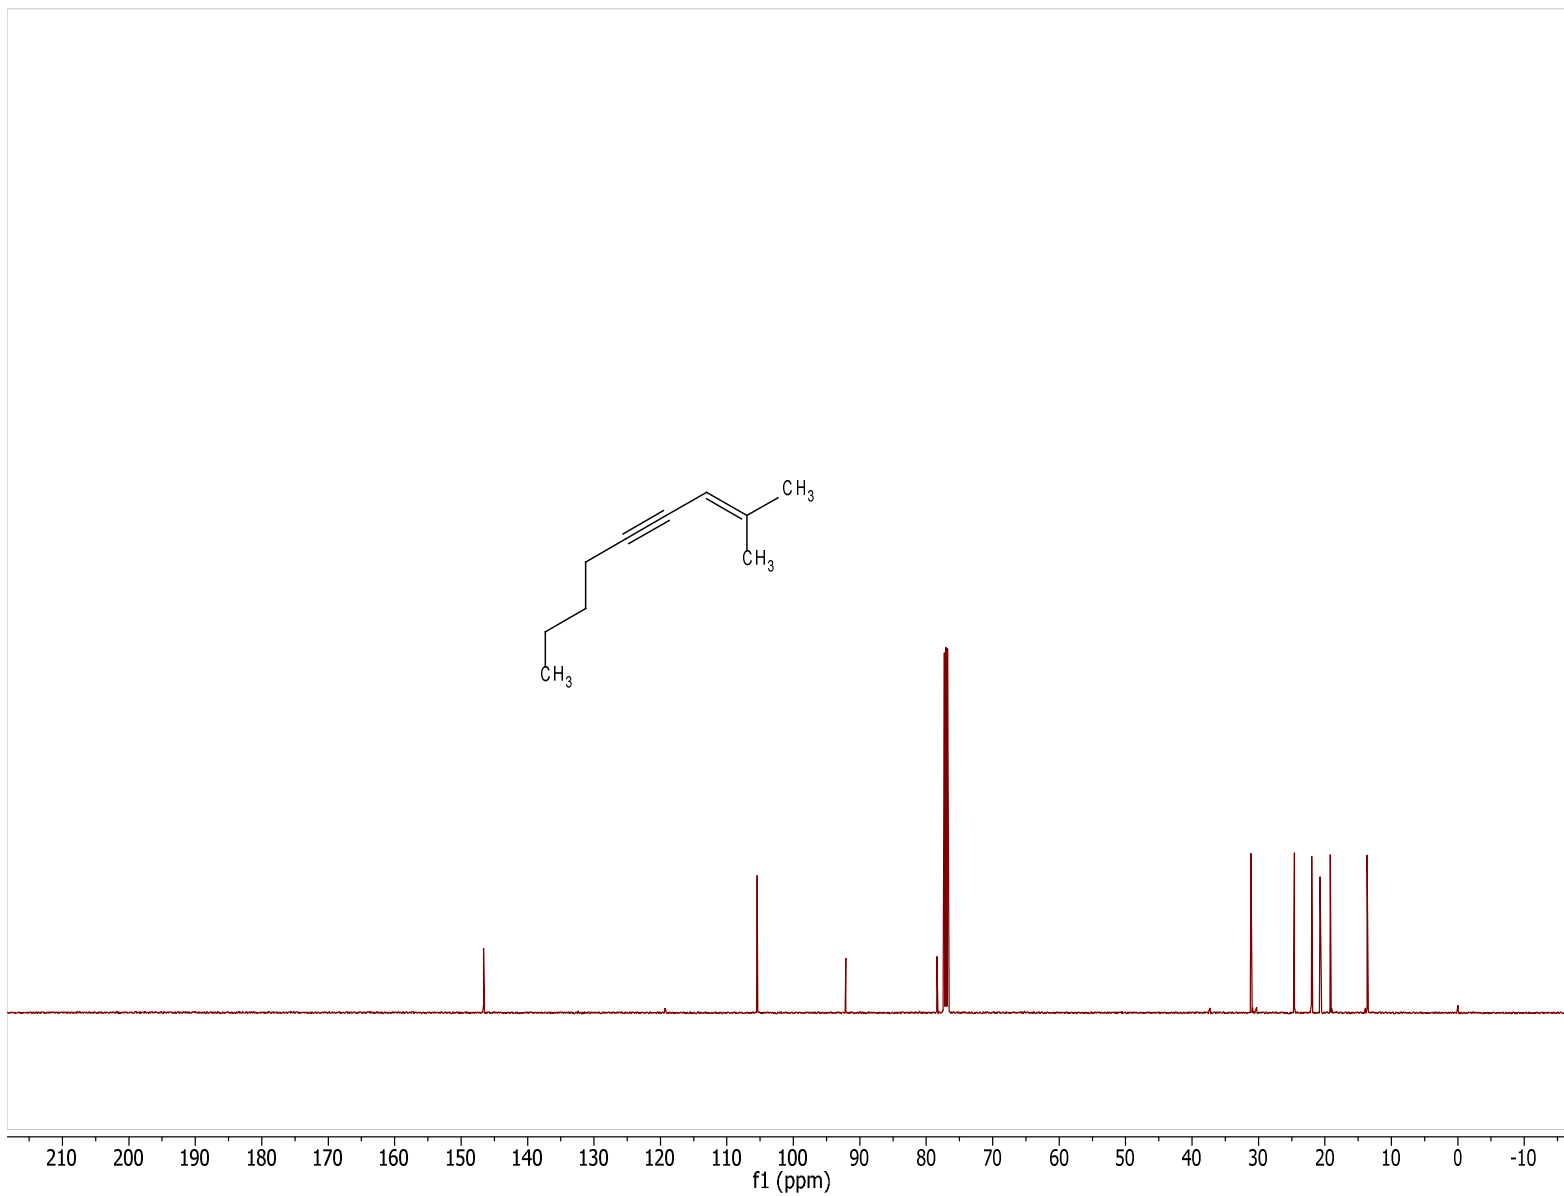

Compound 14-Db.

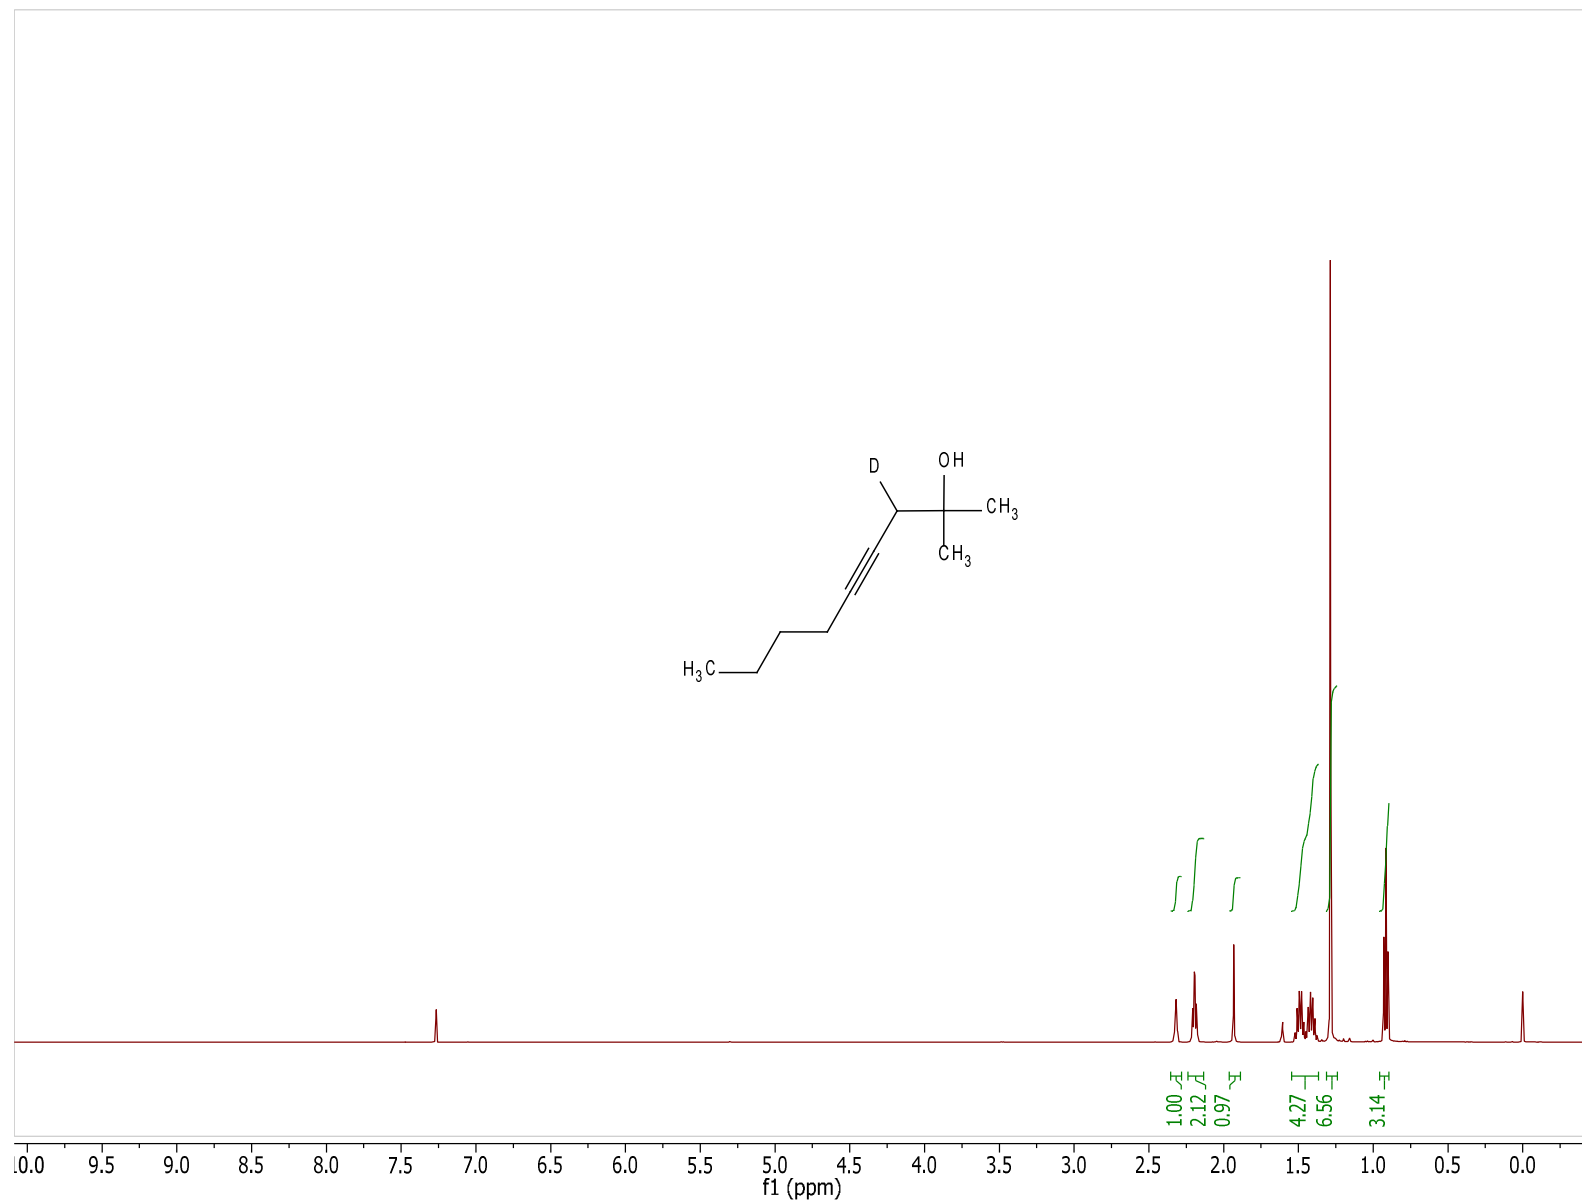



Compound 14-Db.

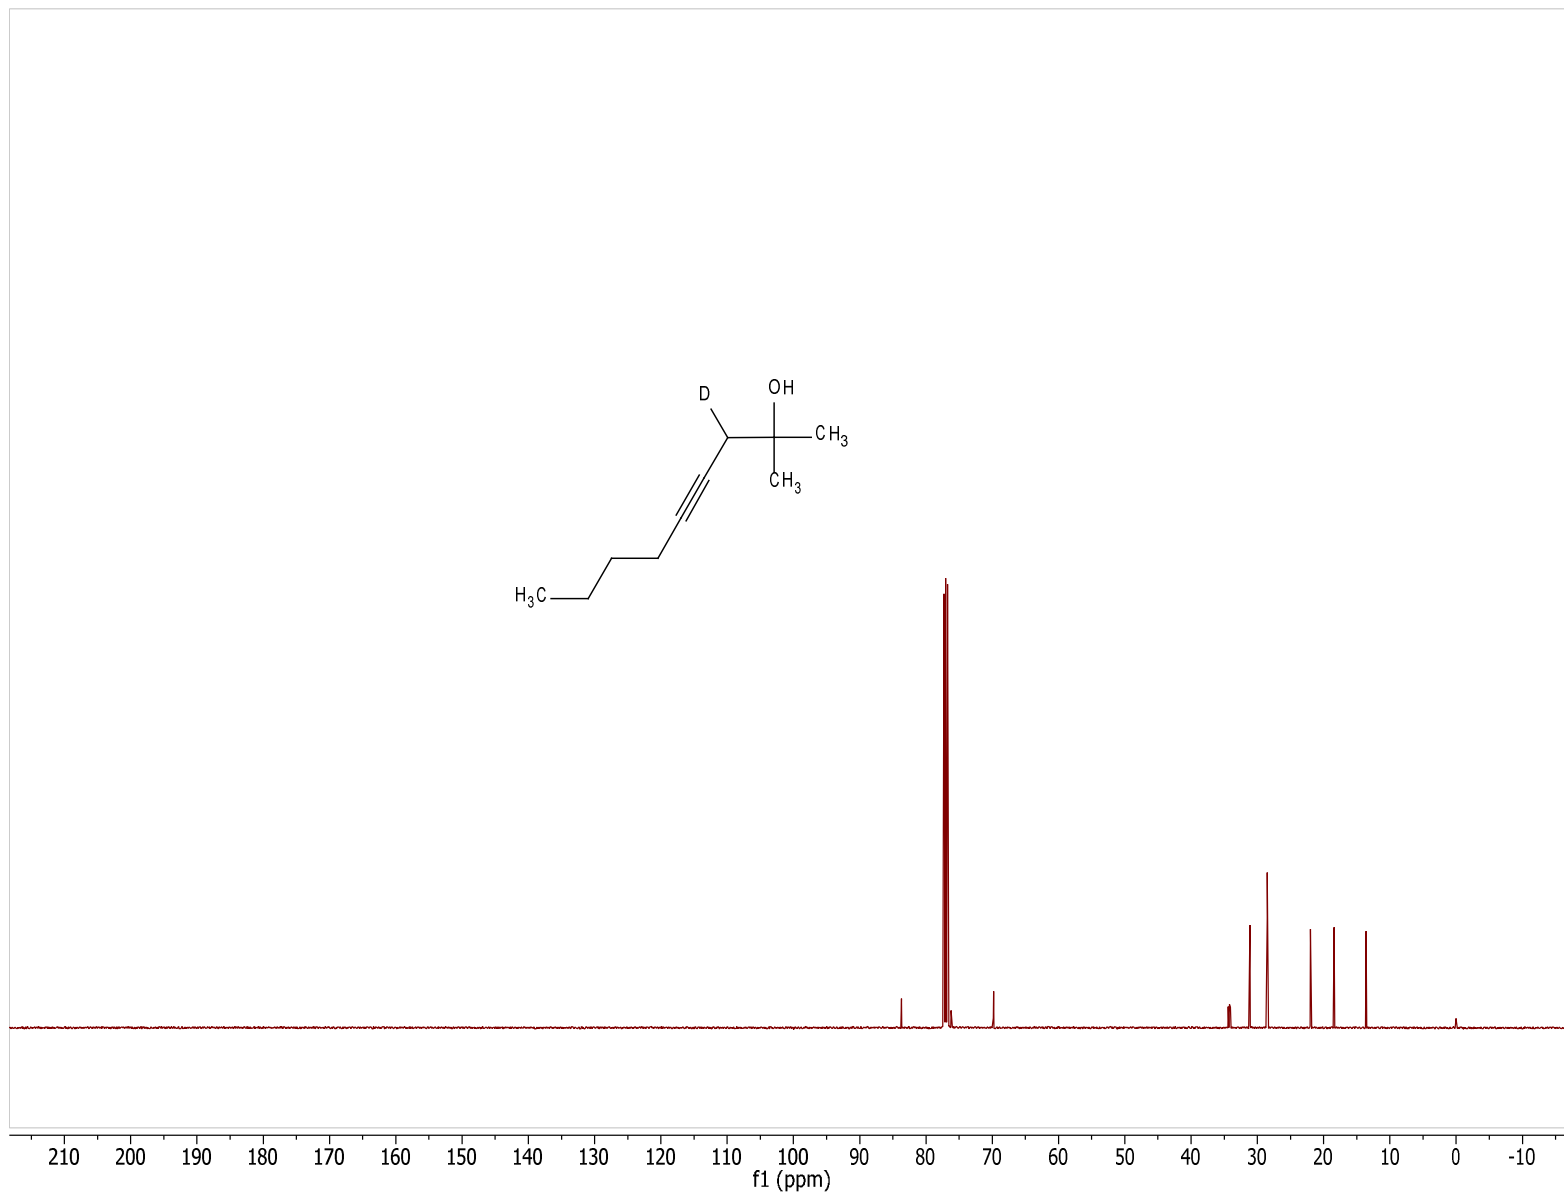

Compound 14-Dc.

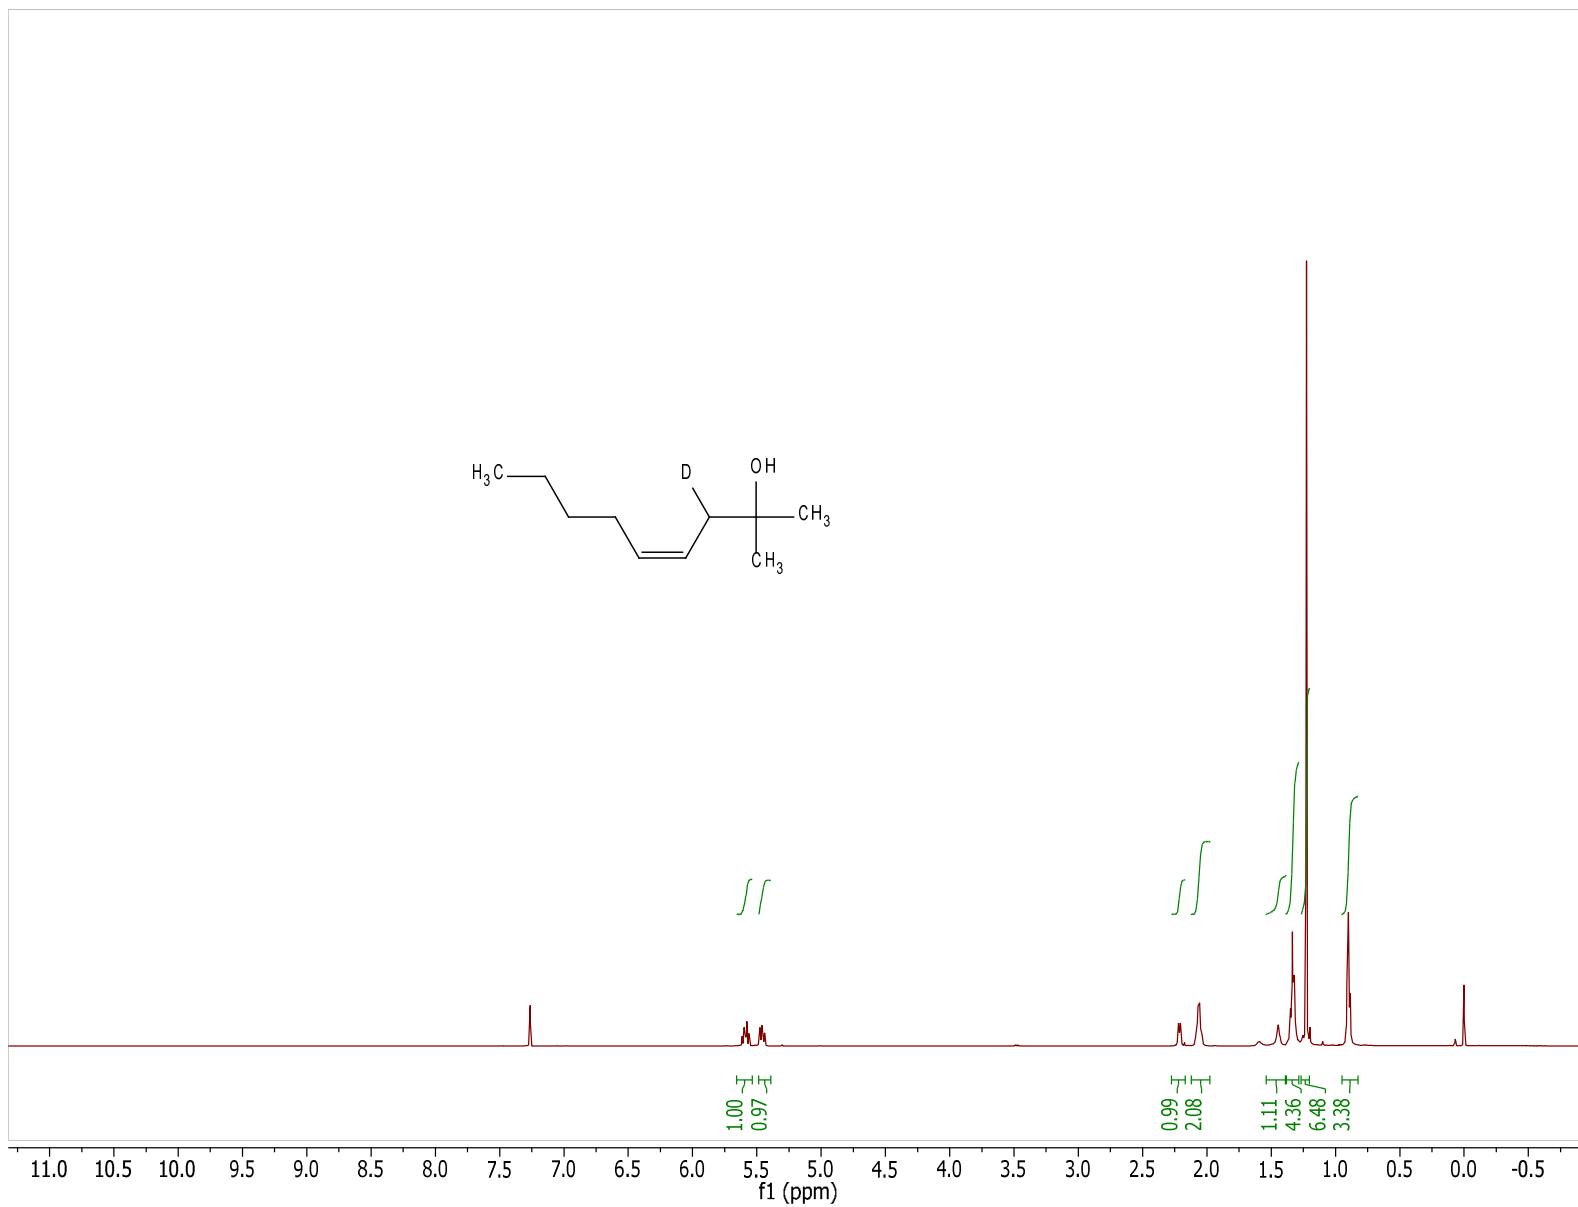

Compound 14-Dc.

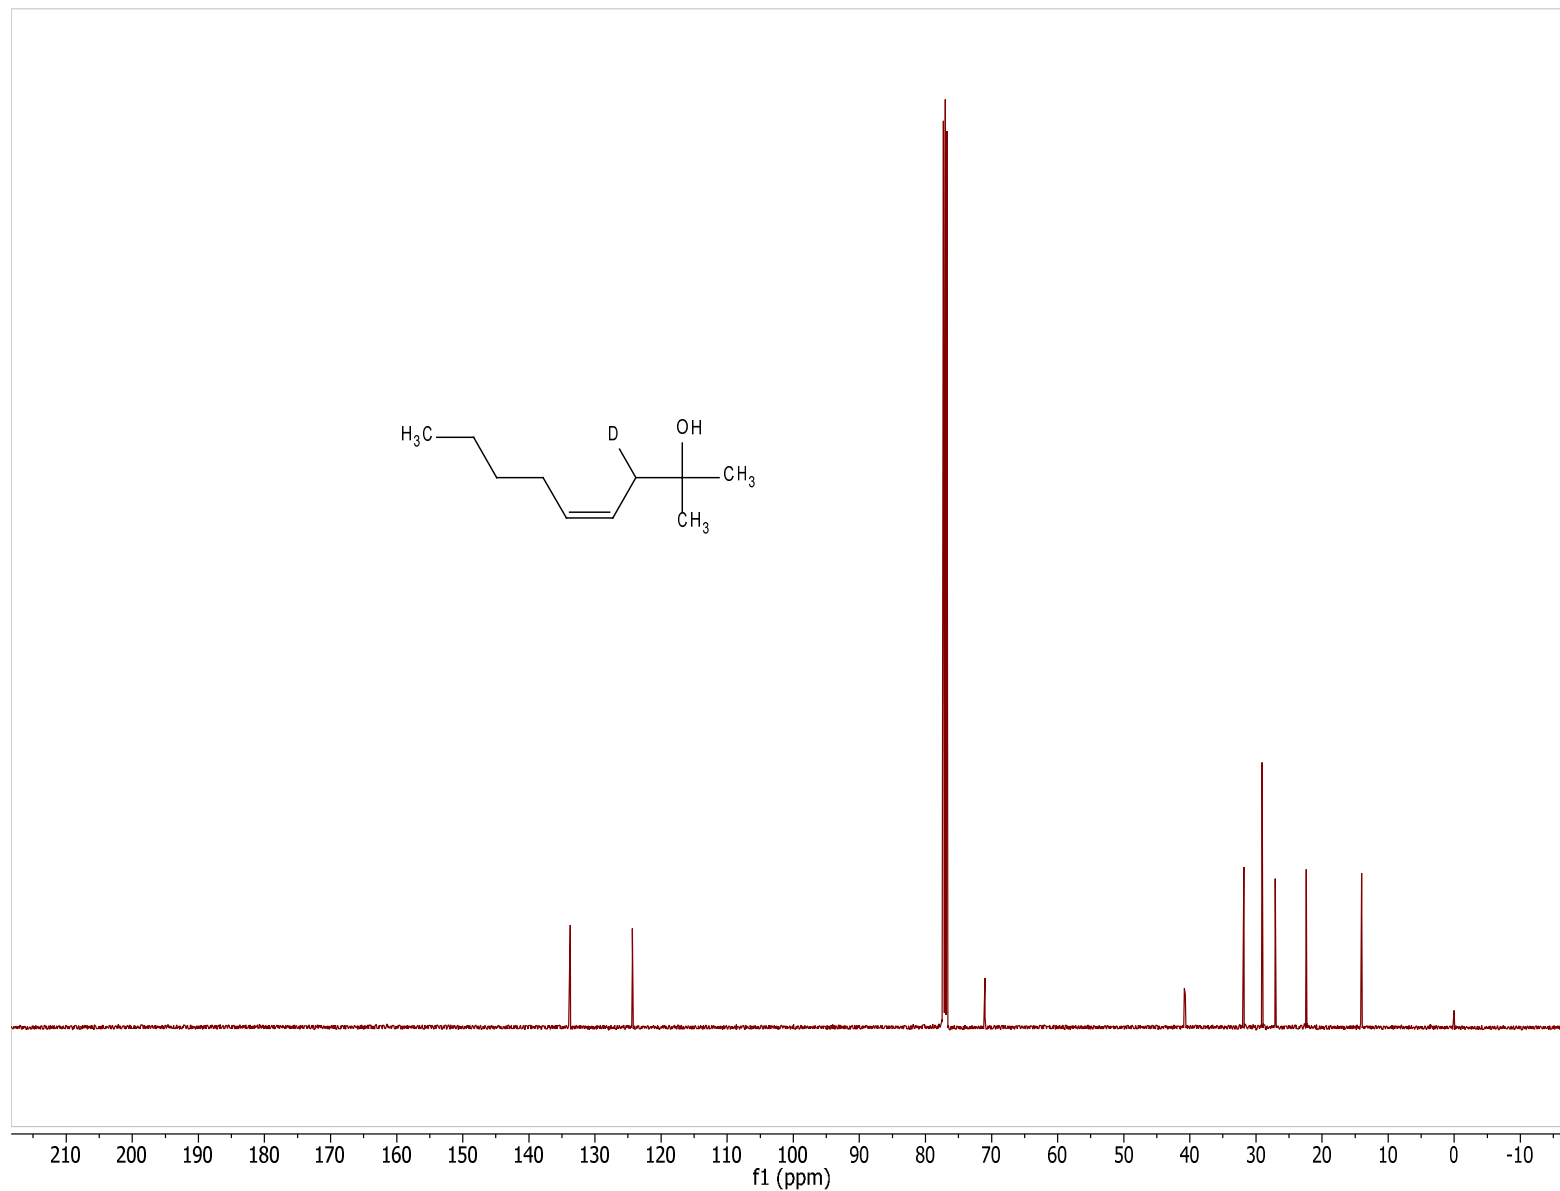

Compound 14-D.

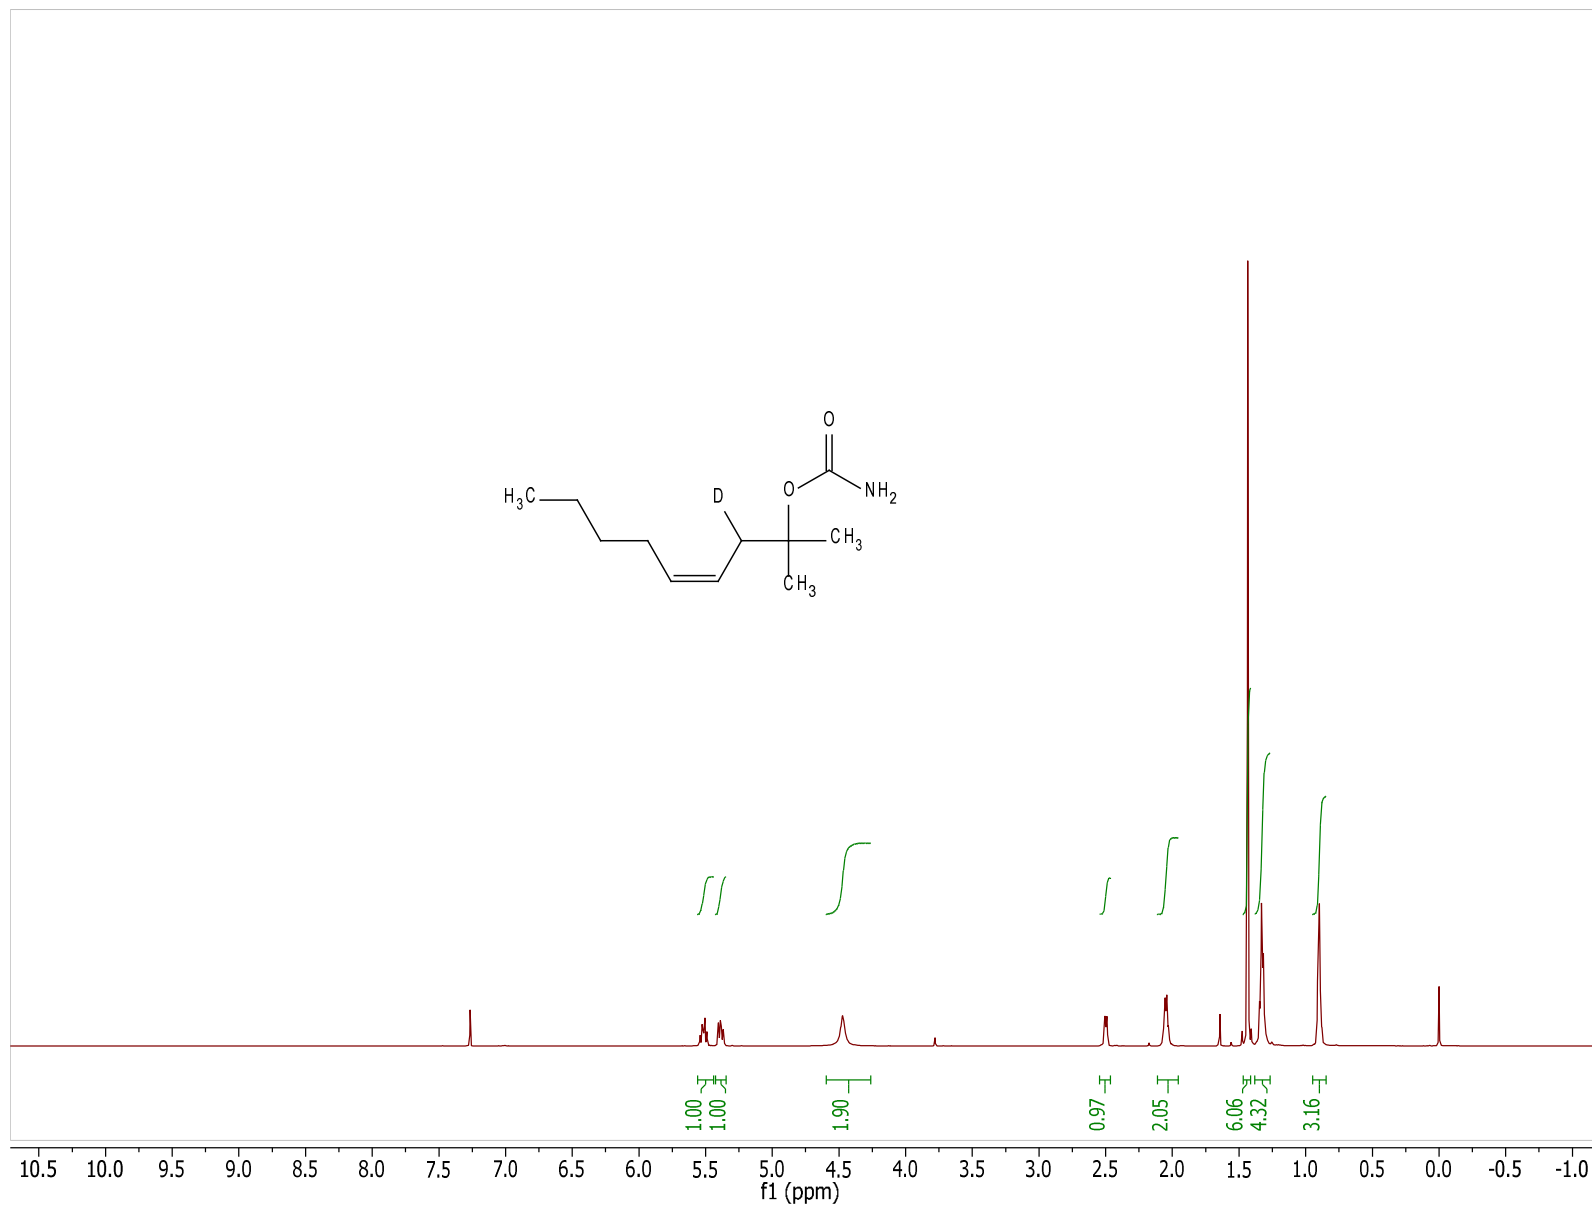

Compound 14-D.

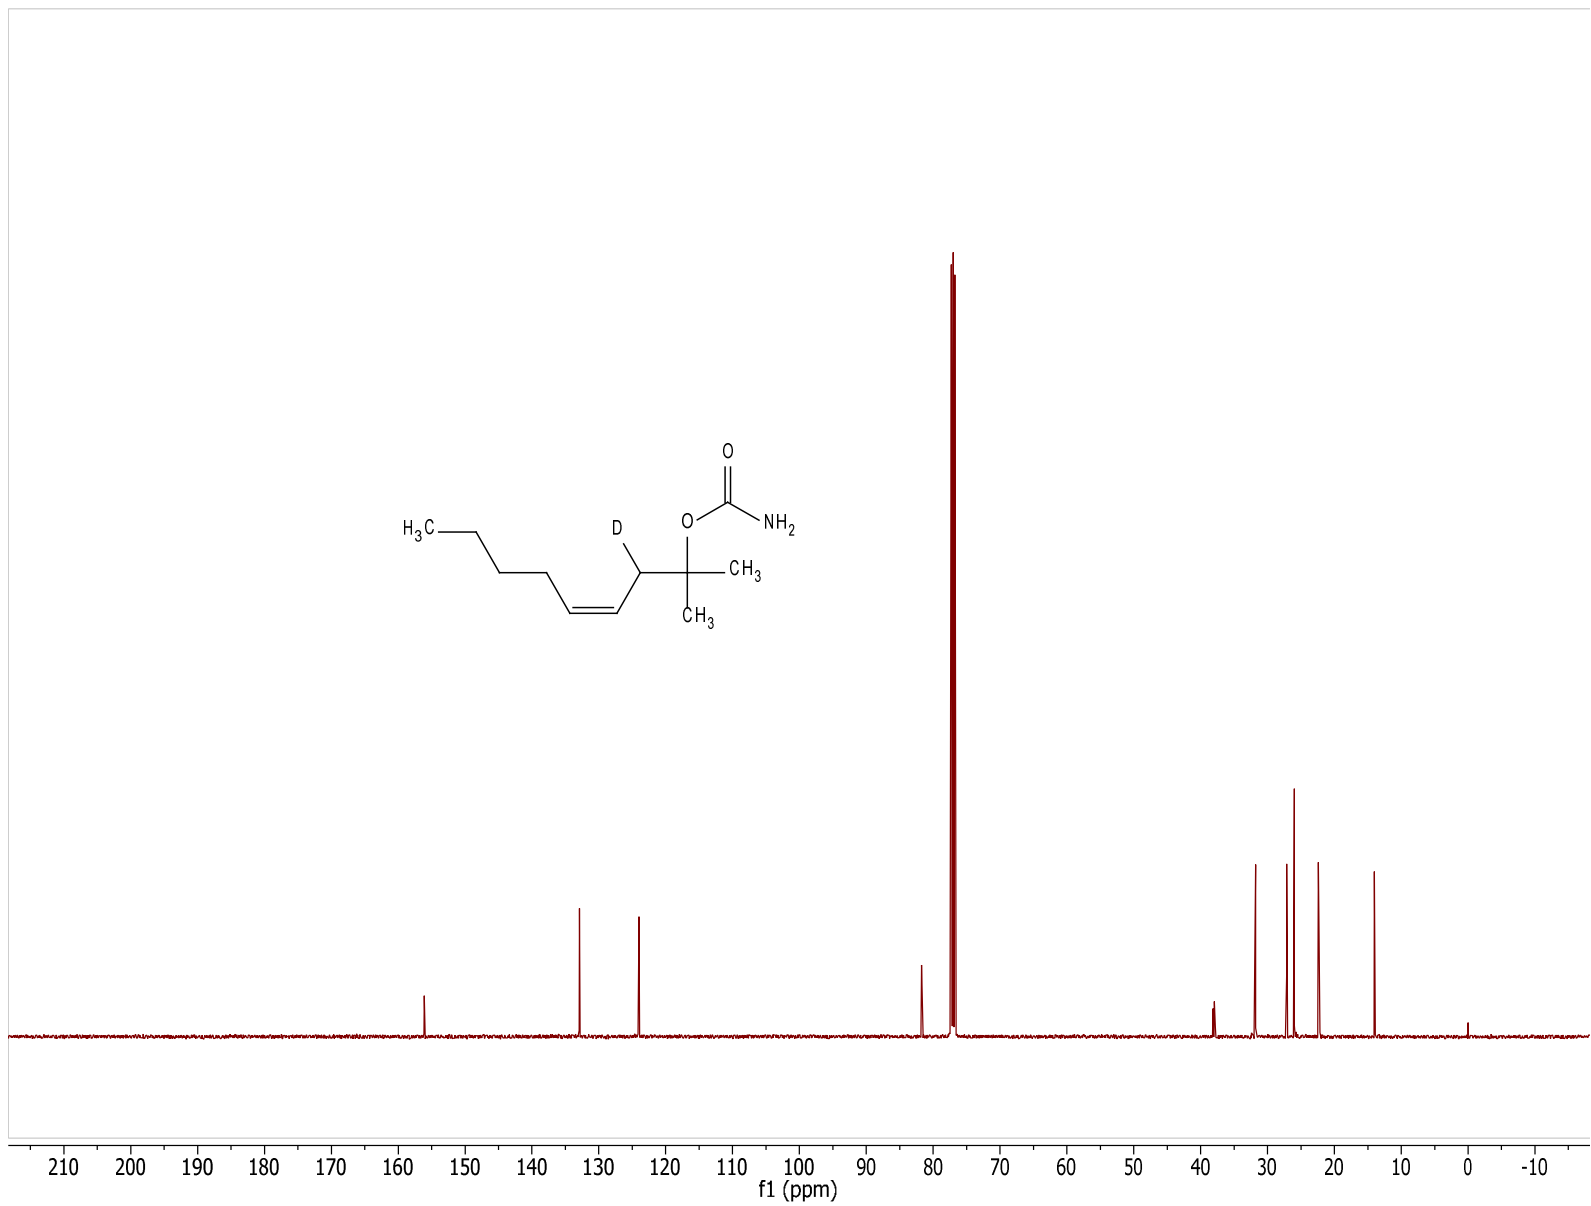

Compound 15-D and 15-H.

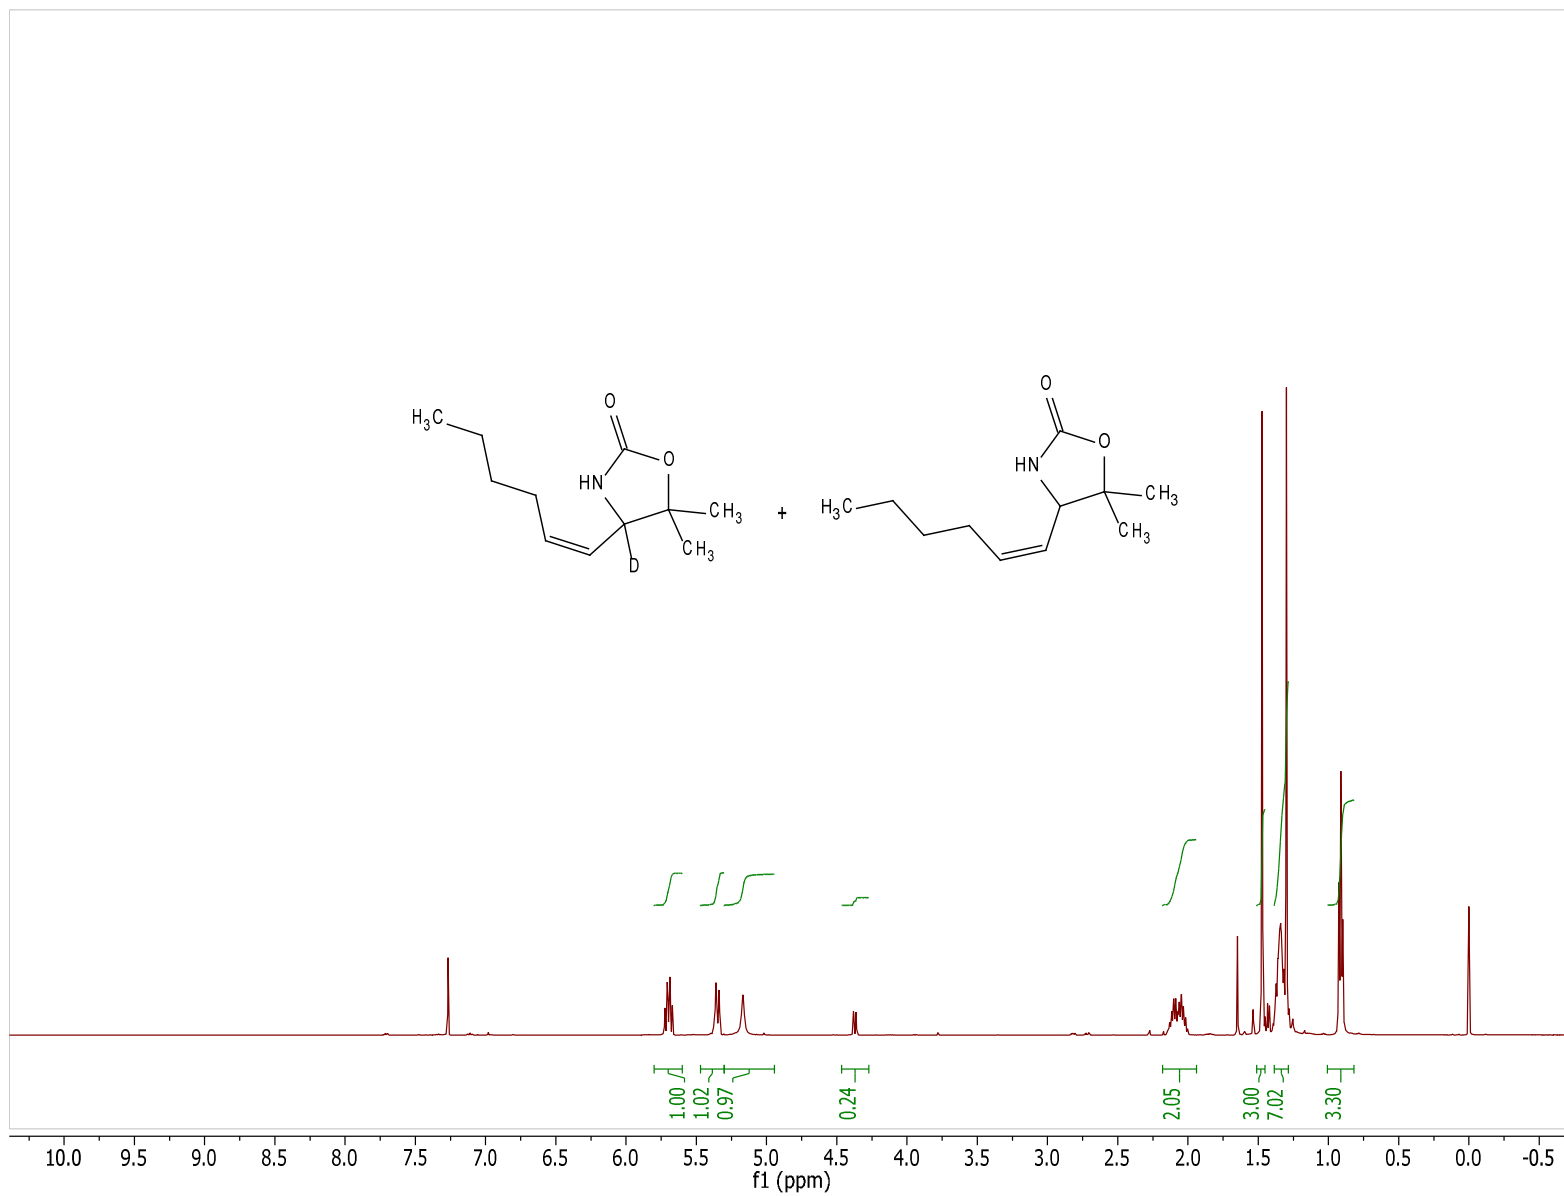

Compound 15-D and 15-H.

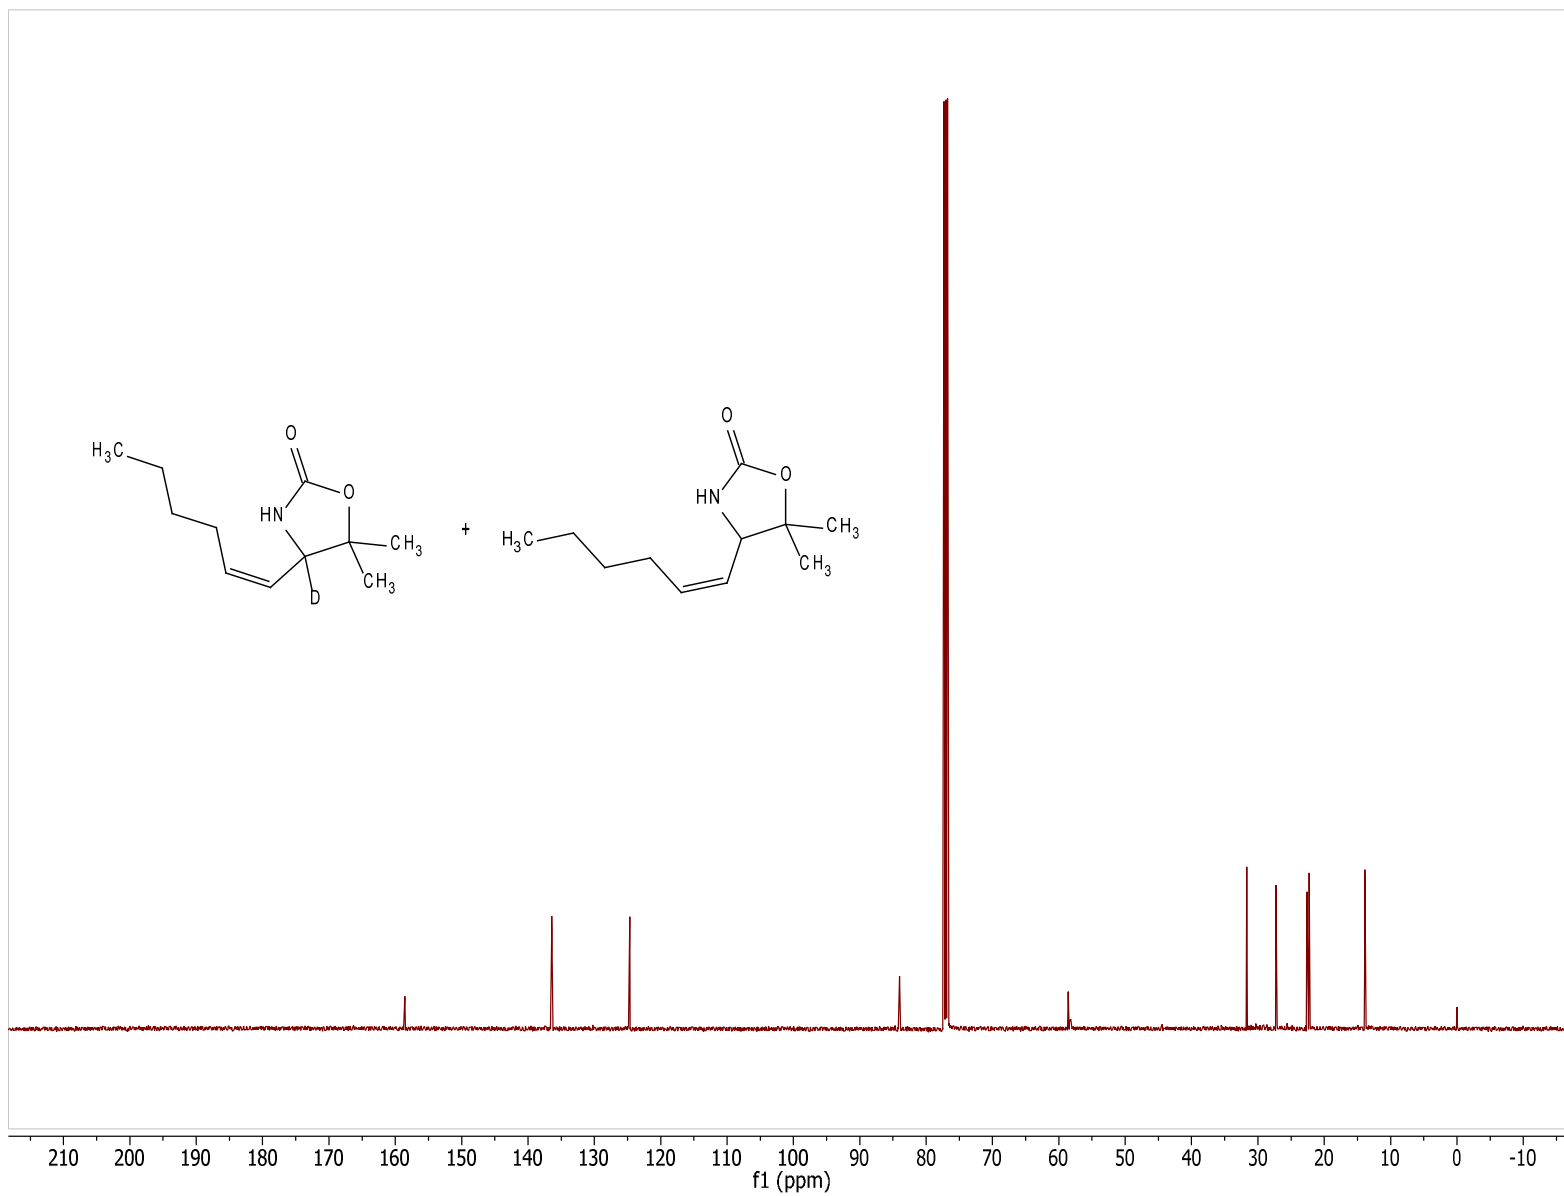

## II. Proton NMR of AgOTf:Ligand Titration experiment.

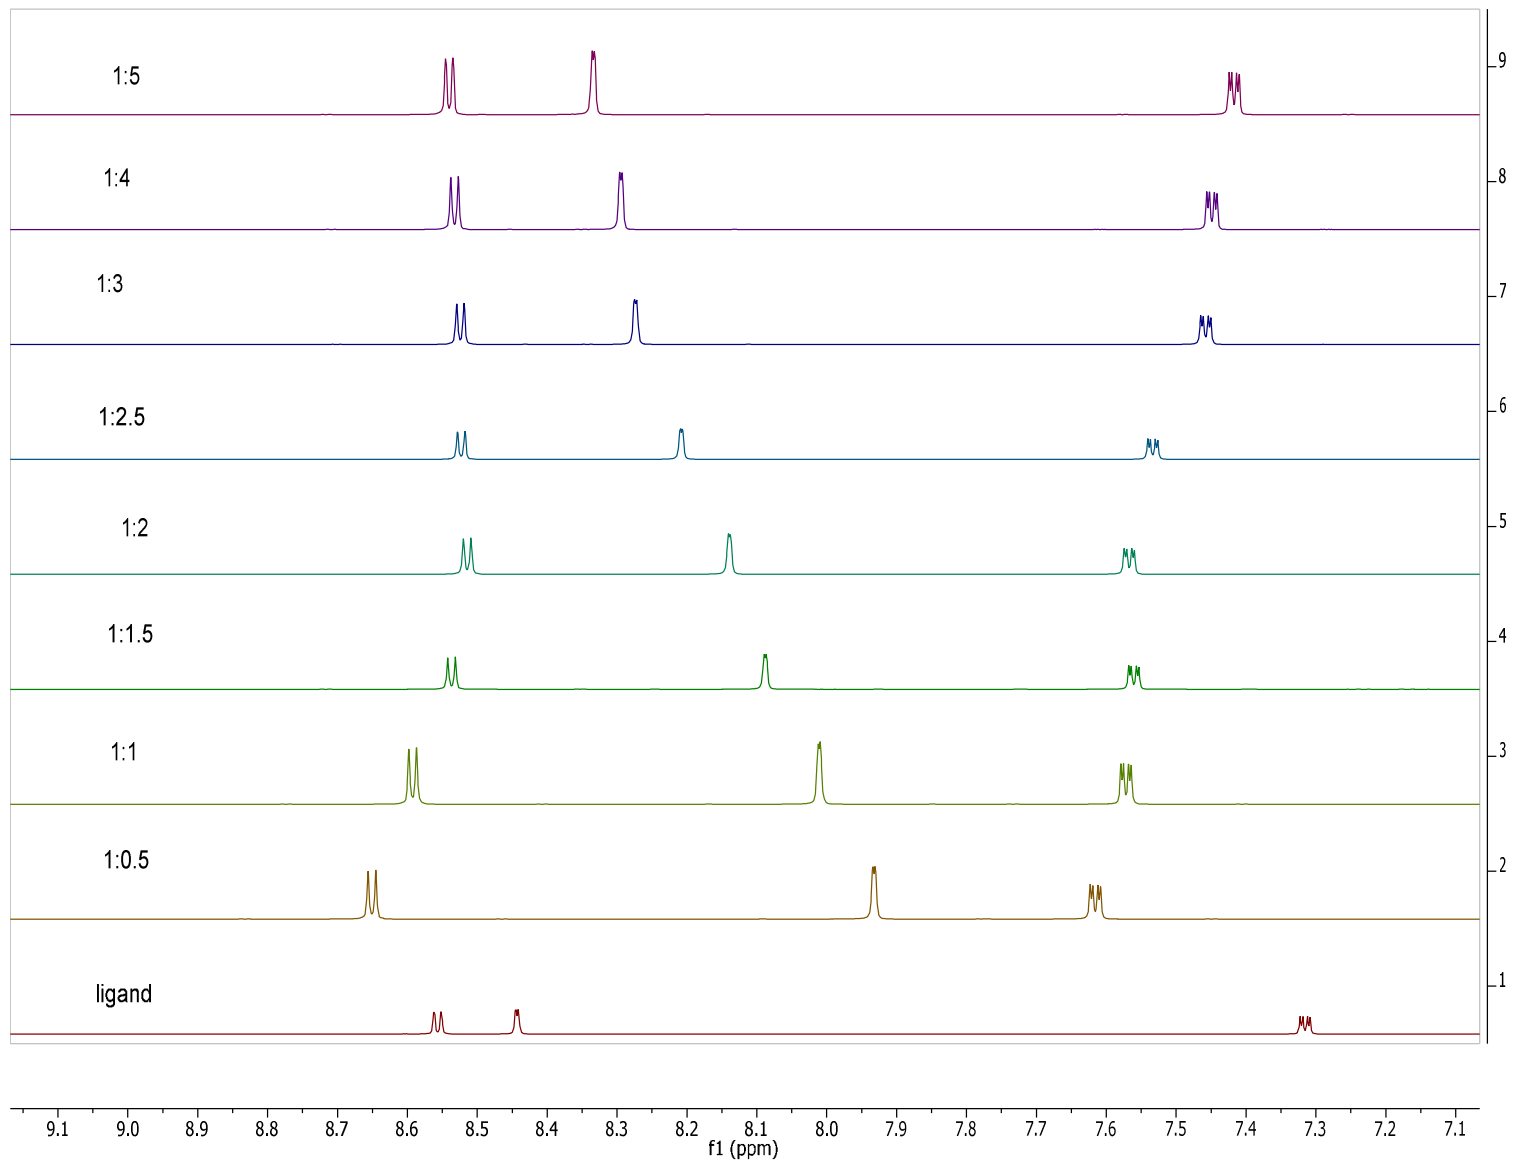



Carbon NMR of AgOTf:Ligand Titration experiment.

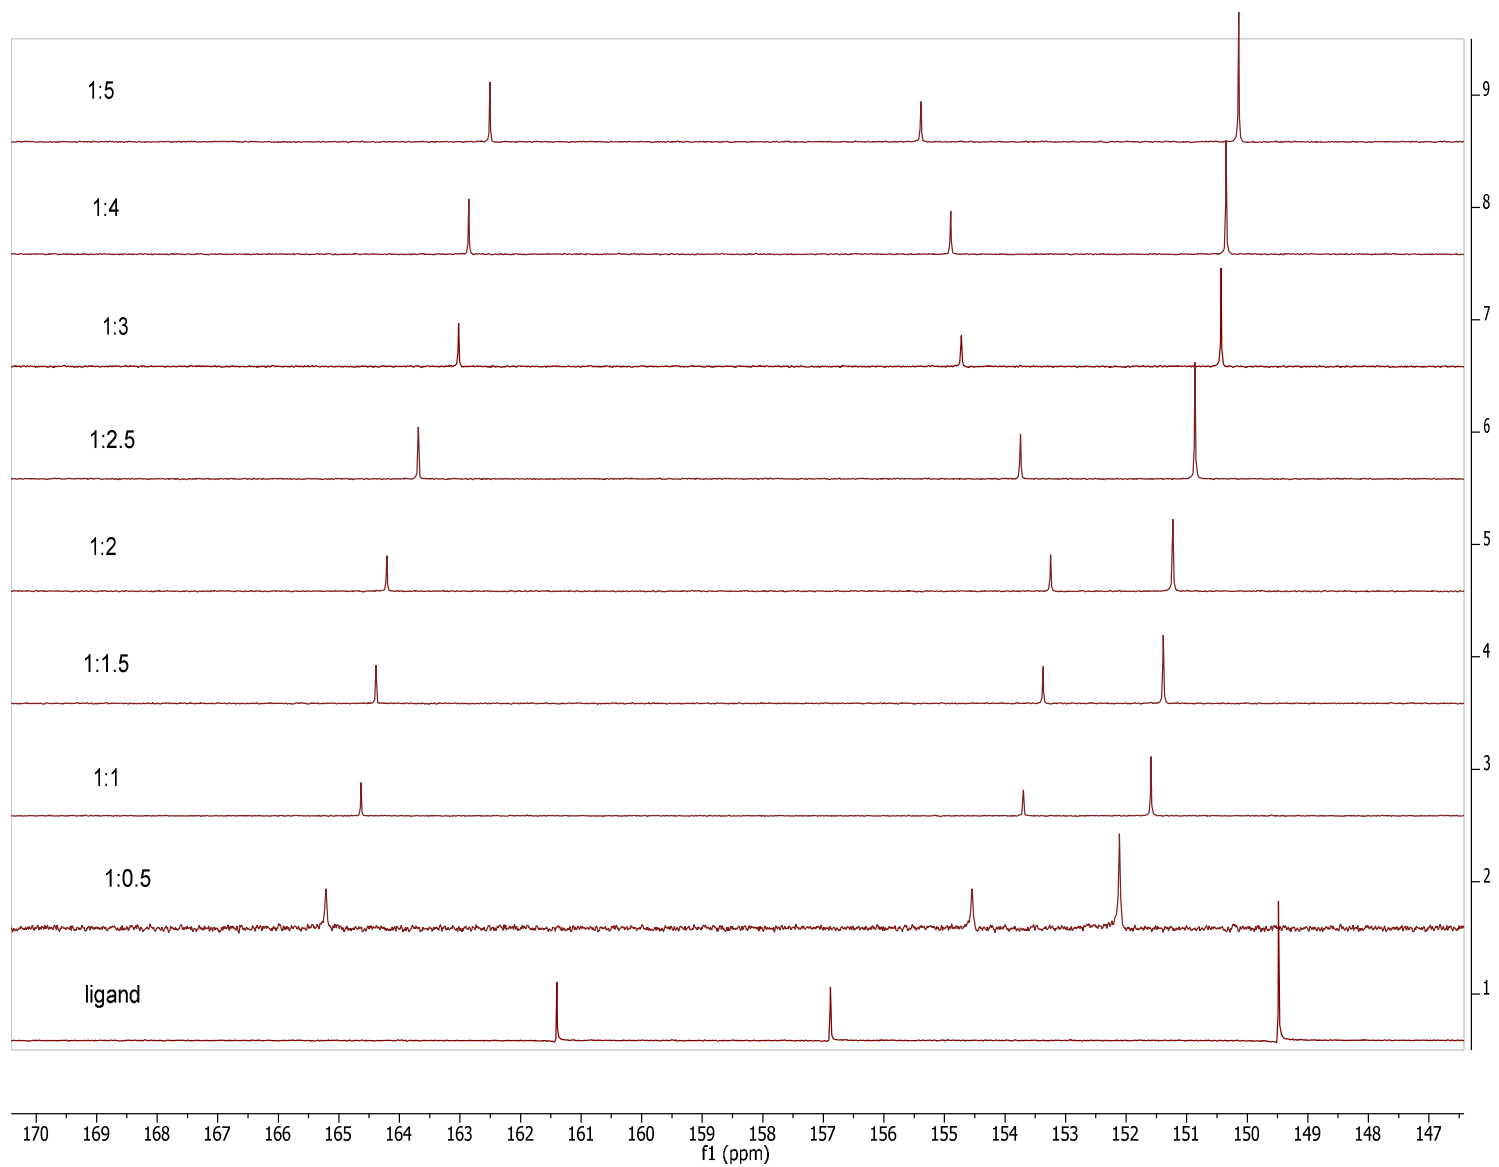

Proton NMR of AgOTf:Ligand Titration experiment.

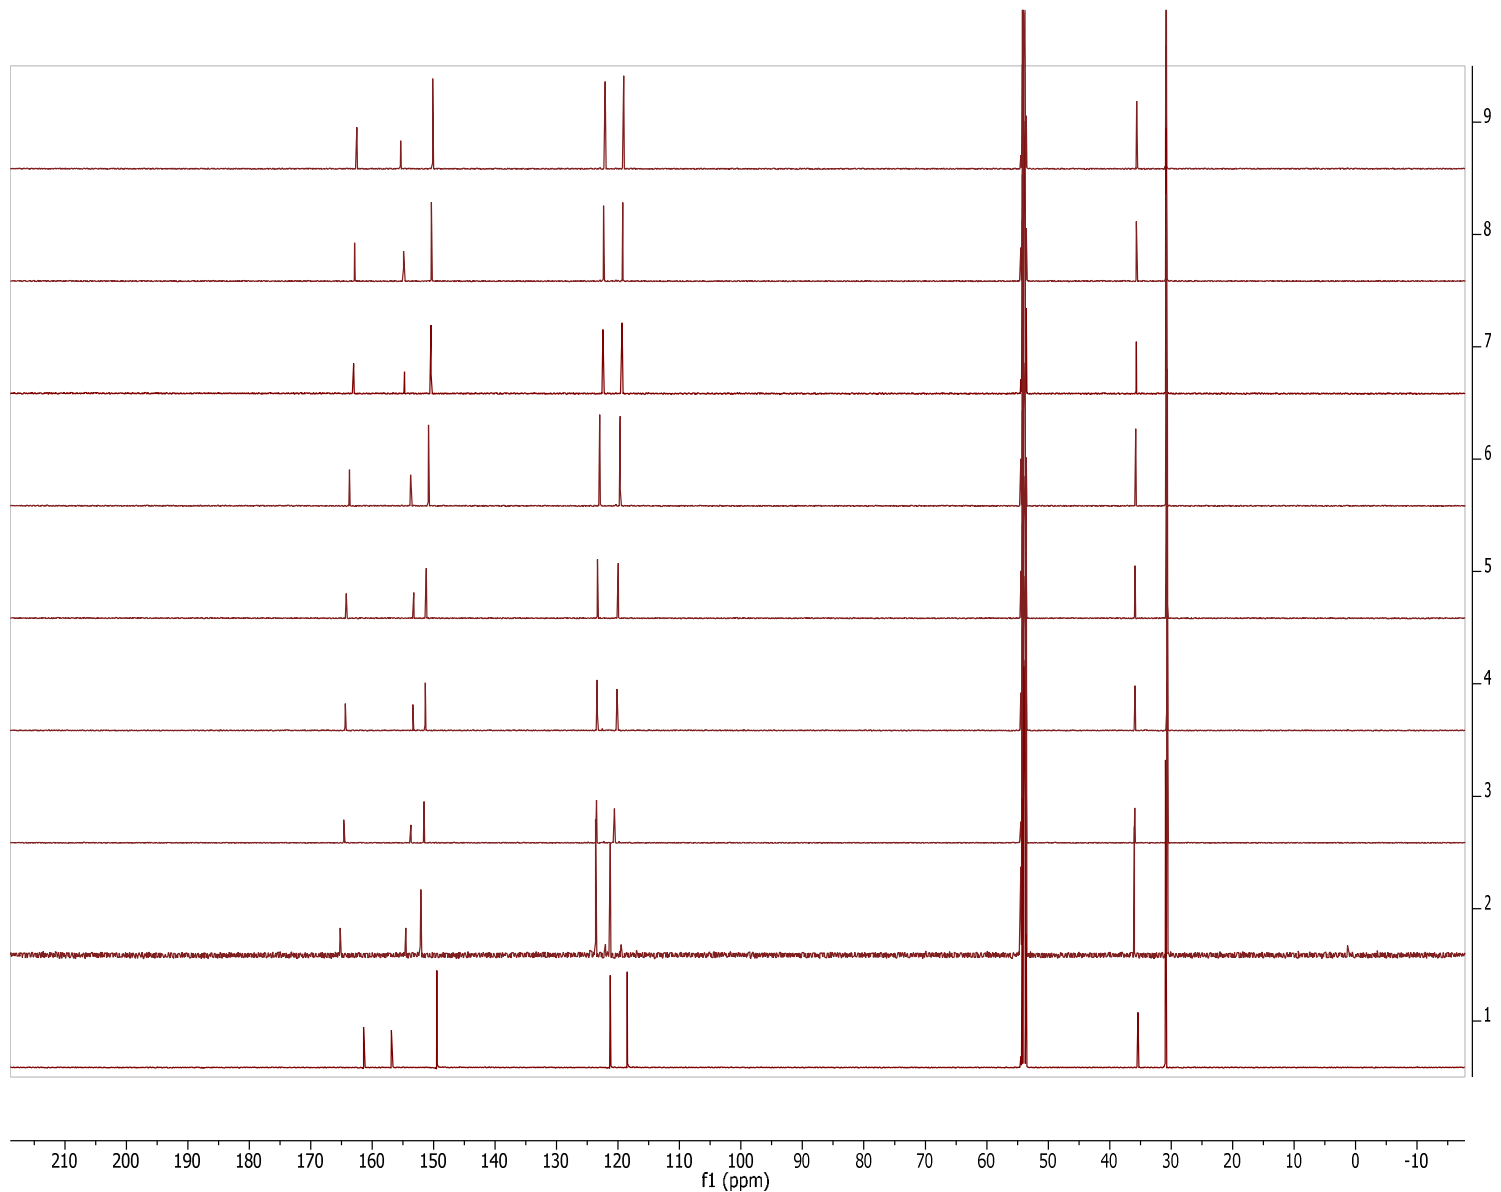

Carbon NMR of AgOTf:Ligand Titration experiment.

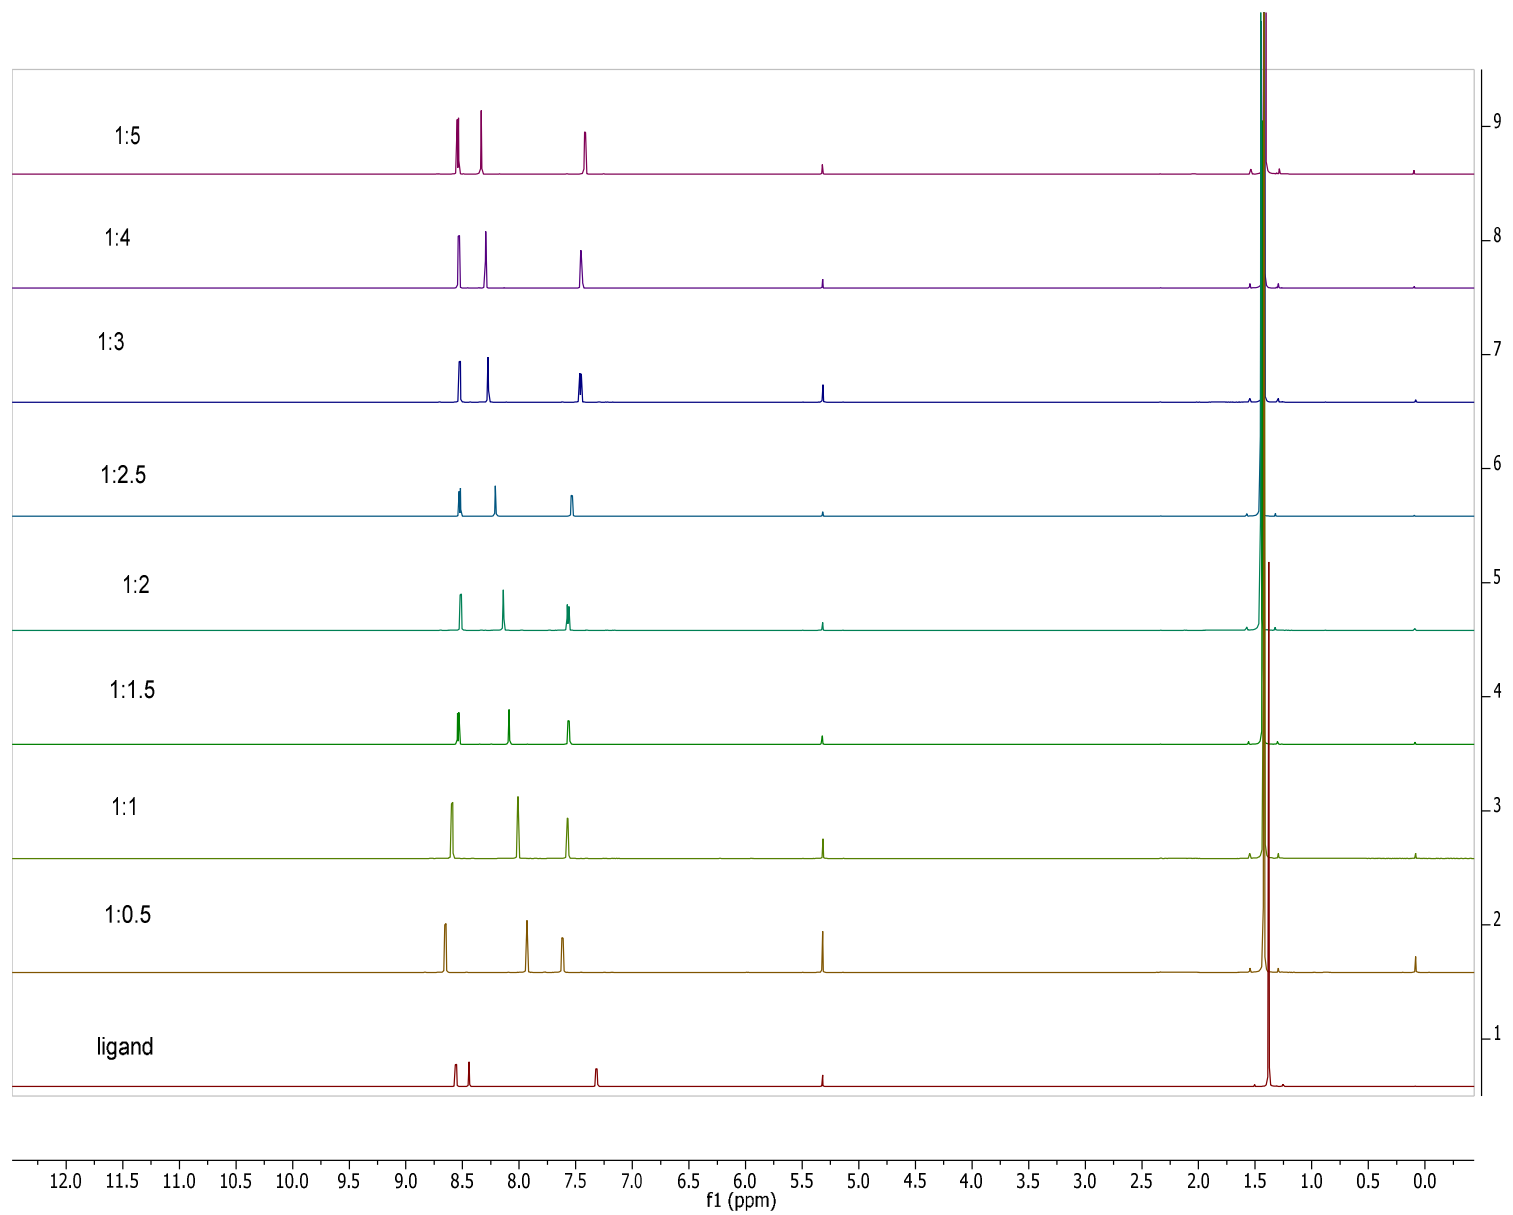

### III. Pulse Gradient Spin Echo Diffusion Experiments.

Ag samples were prepared by dissolving AgOTf (10 mg) with the desired ligand (1 or 2 equiv) in d<sub>2</sub>-dichloromethane (2 mL). The 1:2 bathophen mixture required an additional 2 mL of solvent to prevent precipitation from occurring. Standard DOSY experiments were used to obtain the data on a 500 mhz NMR spectrometer. Diffusion coefficients were obtained using ICON NMR software.

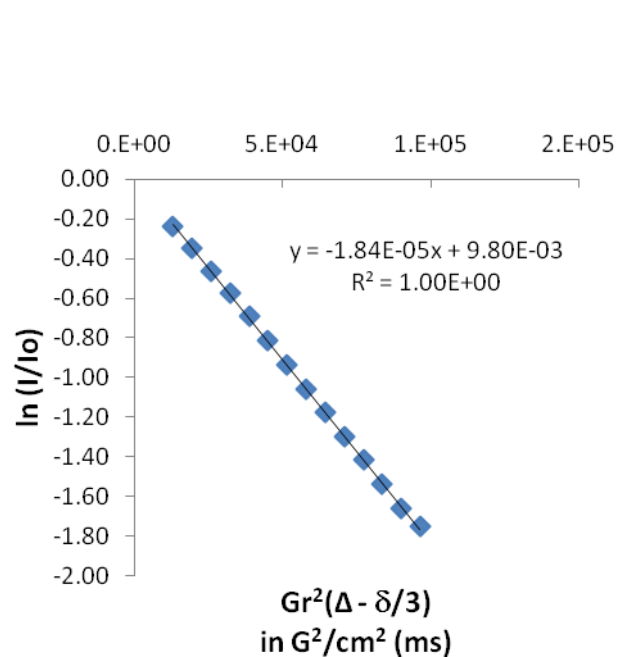

| <b>Rh<sub>2</sub>TPA<sub>4</sub></b> |                           | $\Delta = 46.73$   |  |
|--------------------------------------|---------------------------|--------------------|--|
|                                      |                           | $\delta = 2.00$    |  |
| Gradient                             |                           |                    |  |
| Amplitude (Gr)                       | $Gr^2(\Delta - \delta/3)$ | $\ln(I/I_0)$       |  |
| 16.73                                | 12893.55                  | -0.24              |  |
| 20.48                                | 19321.48                  | -0.35              |  |
| 23.64                                | 25743.97                  | -0.46              |  |
| 26.42                                | 32154.82                  | -0.58              |  |
| 28.94                                | 38581.36                  | -0.69              |  |
| 31.26                                | 45015.12                  | -0.81              |  |
| 33.41                                | 51420.16                  | -0.93              |  |
| 35.44                                | 57858.60                  | -1.06              |  |
| 37.35                                | 64263.11                  | -1.17              |  |
| 39.17                                | 70678.55                  | -1.30              |  |
| 40.92                                | 77135.05                  | -1.41              |  |
| 42.58                                | 83520.26                  | -1.54              |  |
| 44.19                                | 89955.66                  | -1.66              |  |
| 45.74                                | 96376.87                  | -1.75              |  |
|                                      | Average                   | Standard Deviation |  |
| Diffusion Coefficient =              | 6.50E-10                  | 1.05E-11           |  |

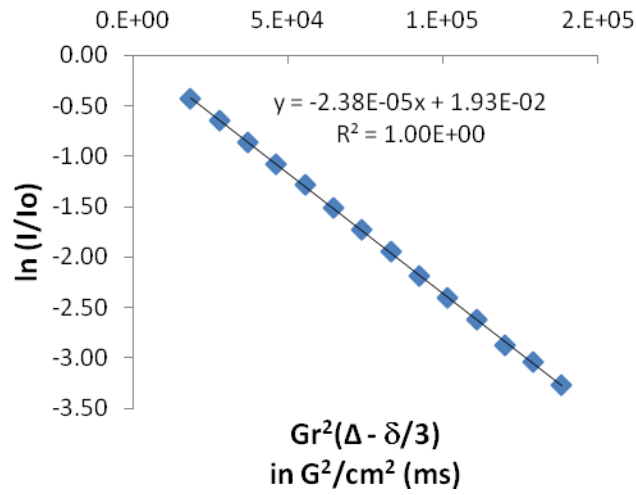

| $Rh_2esp_2$    | $\Delta = 66.73$          |              |
|----------------|---------------------------|--------------|
| Gradient       | $\delta = 2.00$           |              |
| Amplitude (Gr) | $Gr^2(\Delta - \delta/3)$ | $\ln(I/I_0)$ |
| 16.73          | 18491.40                  | -0.43        |
| 20.48          | 27710.09                  | -0.65        |
| 23.64          | 36920.96                  | -0.86        |
| 26.42          | 46115.15                  | -1.08        |
| 28.94          | 55331.83                  | -1.29        |
| 31.26          | 64558.88                  | -1.51        |
| 33.41          | 73744.73                  | -1.73        |
| 35.44          | 82978.47                  | -1.95        |
| 37.35          | 92163.56                  | -2.19        |
| 39.17          | 101364.33                 | -2.41        |
| 40.92          | 110623.98                 | -2.62        |
| 42.58          | 119781.38                 | -2.87        |
| 44.19          | 129010.78                 | -3.04        |
| 45.74          | 138219.82                 | -3.27        |

| Diffusion     | Average    | Standard                |
|---------------|------------|-------------------------|
| Coefficient = | $8.04E-10$ | Deviation<br>$1.00E-11$ |

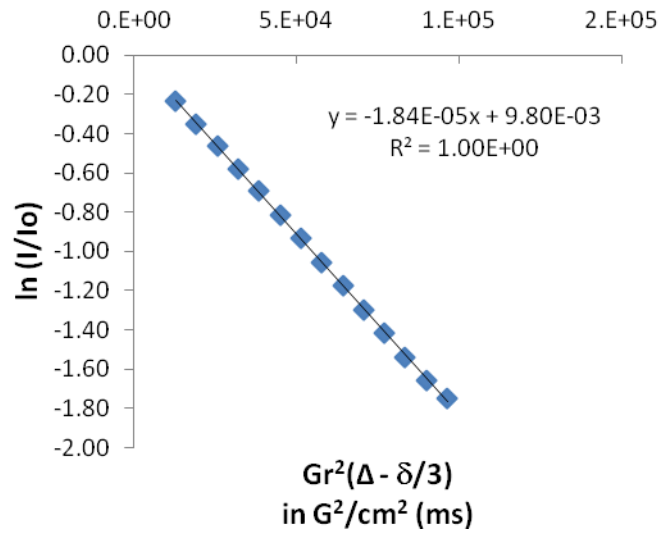

| Amplitude (Gr)          | $Gr^2(\Delta - \delta/3)$ | $\ln(I/I_o)$      |
|-------------------------|---------------------------|-------------------|
| 16.73                   | 18491.40                  | -0.44             |
| 20.48                   | 27710.09                  | -0.68             |
| 23.64                   | 36920.96                  | -0.89             |
| 26.42                   | 46115.15                  | -1.13             |
| 28.94                   | 55331.83                  | -1.35             |
| 31.26                   | 64558.88                  | -1.57             |
| 33.41                   | 73744.73                  | -1.81             |
| 35.44                   | 82978.47                  | -2.01             |
| 37.35                   | 92163.56                  | -2.27             |
| 39.17                   | 101364.33                 | -2.47             |
| 40.92                   | 110623.98                 | -2.71             |
| 42.58                   | 119781.38                 | -2.95             |
| 44.19                   | 129010.78                 | -3.16             |
| 45.74                   | 138219.82                 | -3.40             |
| Diffusion Coefficient = | Average<br>8.55E-10       | Stdev<br>1.59E-11 |

**Ag: Bubby**  
**1:1**  
 $\Delta = 66.73 \delta$   
 $= 2.00$

Gradient

Amplitude (Gr)

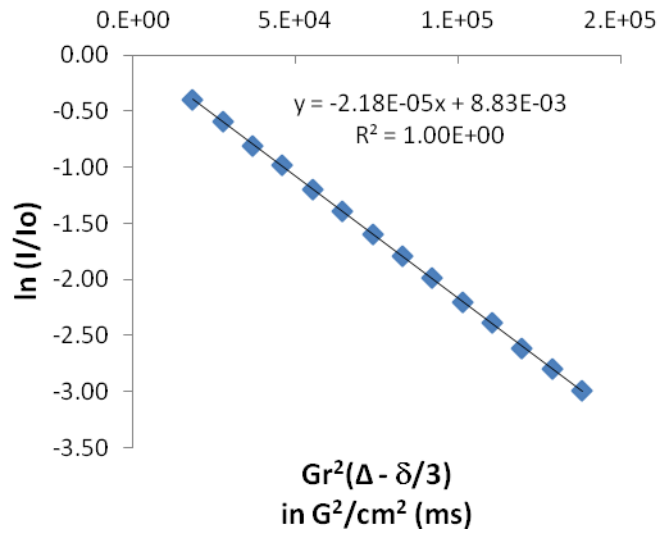

| <b>Ag:tBubpy 1:2</b> |                      | $\Delta = 66.73$ |
|----------------------|----------------------|------------------|
| Gradient             |                      | $d = 2.00$       |
| Amplitude (Gr)       | $Gr^2(\Delta - d/3)$ | $\ln(I/I_o)$     |
| 16.73                | 18491.40             | -0.40            |
| 20.48                | 27710.09             | -0.59            |
| 23.64                | 36920.96             | -0.81            |
| 26.42                | 46115.15             | -0.98            |
| 28.94                | 55331.83             | -1.20            |
| 31.26                | 64558.88             | -1.39            |
| 33.41                | 73744.73             | -1.59            |
| 35.44                | 82978.47             | -1.79            |
| 37.35                | 92163.56             | -1.98            |
| 39.17                | 101364.33            | -2.21            |
| 40.92                | 110623.98            | -2.39            |
| 42.58                | 119781.38            | -2.62            |
| 44.19                | 129010.78            | -2.80            |
| 45.74                | 138219.82            | -2.99            |
| Diffusion            | Average              | Stdev            |
| Coefficient =        | $7.59E-10$           | $7.74E-12$       |

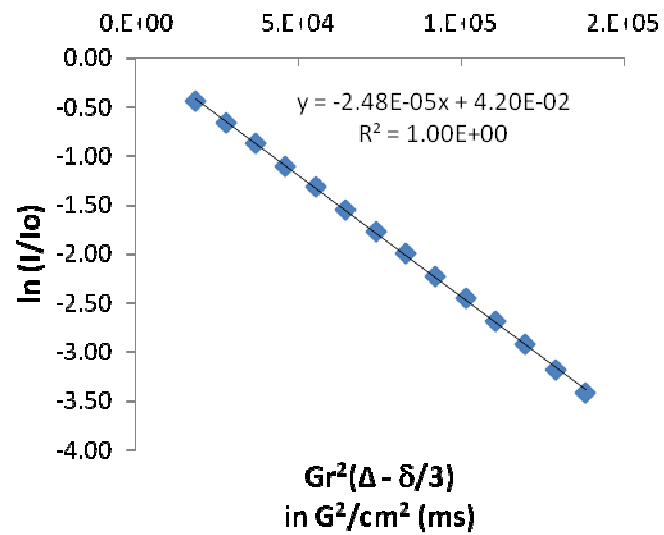

$\Delta = 66.73$   
 $\delta = 2.00$

**Ag:bathoPhen 1:1**

| Gradient Amplitude (Gr) | $Gr^2(\Delta - \delta/3)$ | $\ln(I/I_0)$ |
|-------------------------|---------------------------|--------------|
| 16.73                   | 18491.40                  | -0.44        |
| 20.48                   | 27710.09                  | -0.66        |
| 23.64                   | 36920.96                  | -0.88        |
| 26.42                   | 46115.15                  | -1.11        |
| 28.94                   | 55331.83                  | -1.32        |
| 31.26                   | 64558.88                  | -1.55        |
| 33.41                   | 73744.73                  | -1.77        |
| 35.44                   | 82978.47                  | -2.00        |
| 37.35                   | 92163.56                  | -2.23        |
| 39.17                   | 101364.33                 | -2.46        |
| 40.92                   | 110623.98                 | -2.69        |
| 42.58                   | 119781.38                 | -2.93        |
| 44.19                   | 129010.78                 | -3.19        |
| 45.74                   | 138219.82                 | -3.42        |
| Diffusion Coefficient = | Average                   | Stdev        |
|                         | 8.14E-10                  | 1.85E-11     |



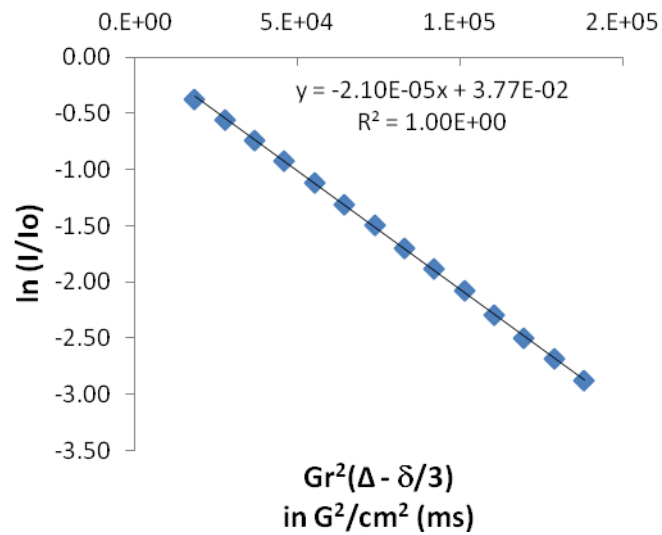

$\Delta = 66.73$   
 $\delta = 2.00$

**Ag:bathoPhen 1:2**  
Gradient

| Amplitude (Gr) | $Gr^2(\Delta - \delta/3)$ | $\ln(I/I_0)$ |
|----------------|---------------------------|--------------|
| 16.73          | 18491.40                  | -0.38        |
| 20.48          | 27710.09                  | -0.56        |
| 23.64          | 36920.96                  | -0.75        |
| 26.42          | 46115.15                  | -0.92        |
| 28.94          | 55331.83                  | -1.12        |
| 31.26          | 64558.88                  | -1.31        |
| 33.41          | 73744.73                  | -1.49        |
| 35.44          | 82978.47                  | -1.70        |
| 37.35          | 92163.56                  | -1.88        |
| 39.17          | 101364.33                 | -2.08        |
| 40.92          | 110623.98                 | -2.29        |
| 42.58          | 119781.38                 | -2.51        |
| 44.19          | 129010.78                 | -2.69        |
| 45.74          | 138219.82                 | -2.88        |
| Diffusion      | Average                   | Stdev        |
| Coefficient =  | 6.88E-10                  | 1.38E-11     |

**Ag:Buterpy 1:1**

$\Delta = 66.73$   
 $\delta = 2.00$

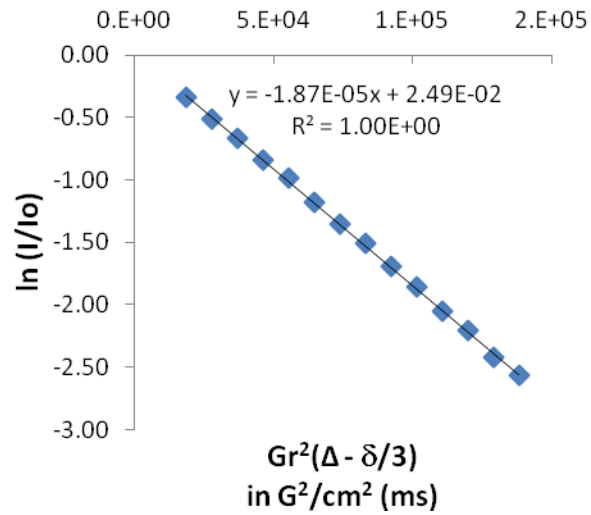

| Gradient Amplitude (Gr) | $Gr^2(\Delta - \delta/3)$ | $\ln(I/I_o)$ |
|-------------------------|---------------------------|--------------|
| 16.73                   | 18491.40                  | -0.34        |
| 20.48                   | 27710.09                  | -0.51        |
| 23.64                   | 36920.96                  | -0.66        |
| 26.42                   | 46115.15                  | -0.84        |
| 28.94                   | 55331.83                  | -0.99        |
| 31.26                   | 64558.88                  | -1.18        |
| 33.41                   | 73744.73                  | -1.35        |
| 35.44                   | 82978.47                  | -1.51        |
| 37.35                   | 92163.56                  | -1.69        |
| 39.17                   | 101364.33                 | -1.85        |
| 40.92                   | 110623.98                 | -2.05        |
| 42.58                   | 119781.38                 | -2.20        |
| 44.19                   | 129010.78                 | -2.42        |
| 45.74                   | 138219.82                 | -2.56        |
| Diffusion Coefficient = | Average                   | Stdev        |
|                         | 6.30E-10                  | 5.60E-12     |

## Summary of Pulsed Gradient Spin Echo NMR experiments using BHT as an additive.

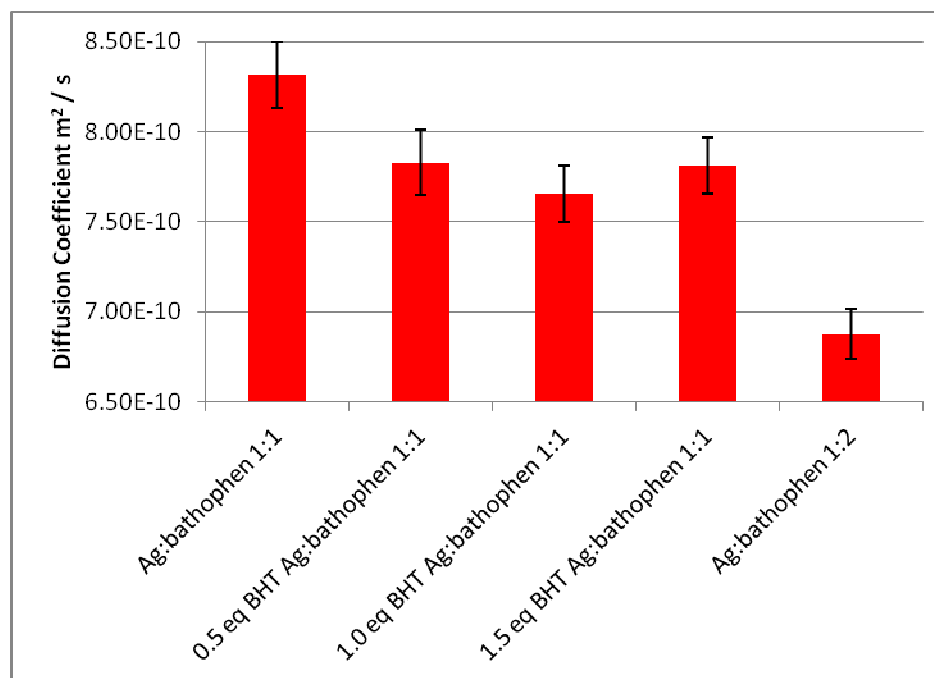

PGSE NMR experiments were carried out on mixtures of the indicated amounts of BHT with 1:1 ratios of AgOTf:bathophenanthroline in deuterated dichloromethane. The addition of 0.5 equiv of BHT relative to the catalyst did perturb the equilibrium from mainly AgphenOTf (the 1:1 complex that is formed when no BHT is present) to other species in solution, accounting for the decreased amount of aziridination in the reaction when BHT is added to the reaction. Increasing the amount of BHT further did not perturb this equilibrium to any great extent. The PGSE data also showed that the BHT did not complex directly to either AgOTf or AgphenOTf and appeared to act only to perturb the equilibrium of the AgphenOTf/Ag(phen)<sub>2</sub>OTf mixture. The fast ligand exchange resulted in an averaged diffusion coefficient between AgphenOTf and Ag(phen)<sub>2</sub>OTf.
